# Supplementary material for: Enantioselective construction of dispirotriheterocycles featuring a 4-aminopyrazolone motif through a cascade Michael/cyclization process
Source: Royal Society of Chemistry journal article supplement (doi:10.1039/d0cc04215c), 2020-01-01

**Enantioselective construction of dispirotriheterocycles featuring a  
4-aminopyrazolone motif through a cascade Michael/cyclization process**

Shiqiang Wei,<sup>a</sup> Xiaoze Bao,<sup>a</sup> Wenyao Wang,<sup>a</sup> Shah Nawaz,<sup>a</sup> Qimin Dai,<sup>b</sup> Jingping Qu<sup>a</sup>  
and Baomin Wang\*<sup>a</sup>

<sup>a</sup> State Key Laboratory of Fine Chemicals, Department of Pharmaceutical Sciences, School of Chemical Engineering, Dalian University of Technology, Dalian 116024, People's Republic of China.

<sup>b</sup> Nenter (Shishou) & Co., Inc., Jingzhou 434000, People's Republic of China

**Content**

|                                                                                              |     |
|----------------------------------------------------------------------------------------------|-----|
| General information .....                                                                    | S1  |
| Experimental procedures and characterization of products <b>3aa-3ag</b> and <b>4-7</b> ..... | S1  |
| References .....                                                                             | S27 |
| NMR spectra for compounds .....                                                              | S27 |

## General information

Unless otherwise noted, materials were purchased from commercial suppliers and used without further purification. Column chromatography was performed on silica gel (200~300 mesh). Enantiomeric excesses (ee) were determined by HPLC using corresponding commercial chiral columns as stated at 30 °C with UV detector at 254 nm. Optical rotations were reported as follows:  $[\alpha]_D^{25}$  (c g/100 mL, solvent). All  $^1\text{H}$  NMR and  $^{19}\text{F}$  NMR spectra were recorded on a Bruker Avance II 400 MHz and Bruker Avance III 471 MHz respectively,  $^{13}\text{C}$  NMR spectra were recorded on a Bruker Avance II 101 MHz or Bruker Avance III 126 MHz with chemical shifts reported as ppm (in  $\text{CDCl}_3$ , TMS as internal standard). Data for  $^1\text{H}$  NMR are recorded as follows: chemical shift ( $\delta$ , ppm), multiplicity (s = singlet, d = doublet, t = triplet, m = multiplet, br = broad singlet, dd = double doublet, coupling constants in Hz, integration). HRMS (ESI) was obtained with a HRMS/MS instrument (LTQ Orbitrap XL TM). The absolute configuration of **5** was assigned by the X-ray analysis.

4-Isothiocyanato pyrazolones<sup>1</sup> and 3-ylideneoxindoles<sup>2</sup> were prepared according to the literature procedures. The racemic products were synthesized using quinine/quinidine = 1:1 as catalyst.

## Experimental procedures and characterization of products 3aa-3ag and 4-7

### General procedure: synthesis of compound 3aa-3ag

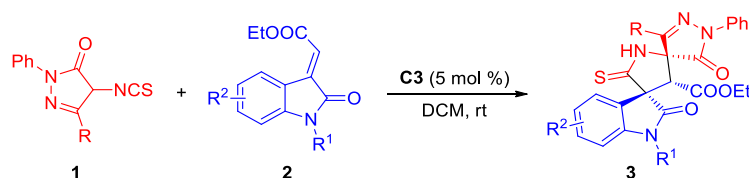

To a Schlenk tube equipped with a magnetic stir bar was charged with compound **1** (0.2 mmol) and **C3** (5 mmol %), followed with DCM (2 mL). Compound **2** (0.24 mmol) was then added in one portion. The reaction mixture was stirred at room temperature. When compound **1** was consumed as checked by TLC, the reaction was stopped and purified by column chromatography on silica gel directly to give the product **3**.

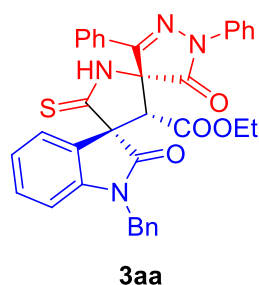

Prepared according to the general procedure within 7 h as white solid (104.4 mg, 89% yield) after silica gel chromatography (EtOAc/petroleum ether = 1/6).  $[\alpha]_D^{25} = 97.7$  (c 0.79,  $\text{CH}_2\text{Cl}_2$ ); Mp 150.1-153 °C;  $^1\text{H}$  NMR (400 MHz, Chloroform-*d*)  $\delta$  9.13 (s, 1H), 8.06 (d,  $J = 7.9$  Hz, 2H), 7.82 (d,  $J = 6.9$  Hz, 2H), 7.63-7.54 (m, 3H), 7.44 (t,  $J = 7.9$  Hz, 2H), 7.41-7.36 (m, 2H), 7.30-7.24 (m, 4H), 7.05 (t,  $J = 7.7$  Hz, 1H), 6.66 (d,  $J = 7.8$  Hz, 1H), 6.47 (t,  $J = 7.6$  Hz, 1H), 5.22 (d,  $J = 7.6$  Hz, 1H), 5.05 (s, 1H), 4.99 (d,  $J = 16.0$  Hz, 1H), 4.92 (d,  $J = 16.0$  Hz, 1H), 3.75-3.67 (m, 1H), 3.57-3.49 (m, 1H),

0.38 (t,  $J = 7.1$  Hz, 3H);  $^{13}\text{C}$  NMR (101 MHz, Chloroform- $d$ )  $\delta$  202.0, 174.6, 168.9, 165.1, 143.8, 137.5, 135.2, 131.3, 130.5, 129.9, 129.3, 129.20, 129.1, 128.6, 127.7, 127.6, 127.5, 125.9, 123.7, 122.7, 119.2, 109.5, 73.9, 68.2, 61.4, 58.4, 44.7, 12.9; HRMS (ESI)  $m/z$  Calcd for  $\text{C}_{35}\text{H}_{29}\text{N}_4\text{O}_4\text{S}^+$  ( $[\text{M}+\text{H}]^+$ ) 601.1904, Found 601.1901; Enantiomeric excess was determined to be 99% (determined by HPLC using chiral AD-H column, hexane/2-propanol = 70/30,  $\lambda = 254$  nm, 30 °C, 0.8 mL/min,  $t_{\text{major}} = 8.4$  min,  $t_{\text{minor}} = 37.5$  min).

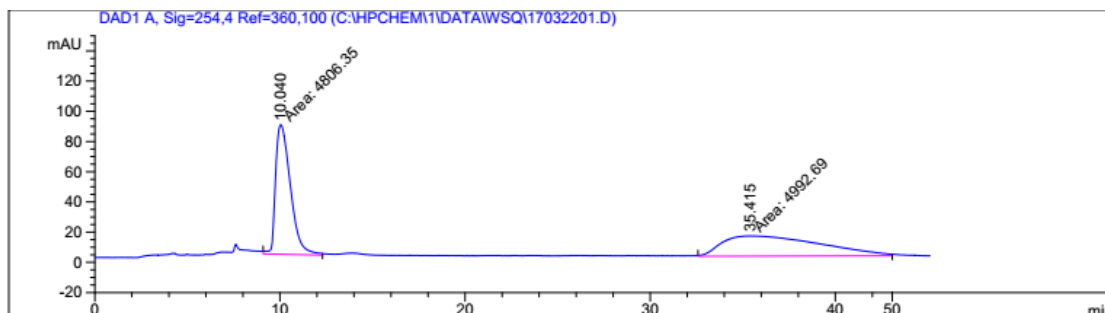

| Peak # | RetTime [min] | Type | Width [min] | Area [mAU*s] | Height [mAU] | Area %  |
|--------|---------------|------|-------------|--------------|--------------|---------|
| 1      | 10.040        | MM   | 0.9337      | 4806.35059   | 85.79714     | 49.0492 |
| 2      | 35.415        | MM   | 6.1768      | 4992.68652   | 13.47171     | 50.9508 |

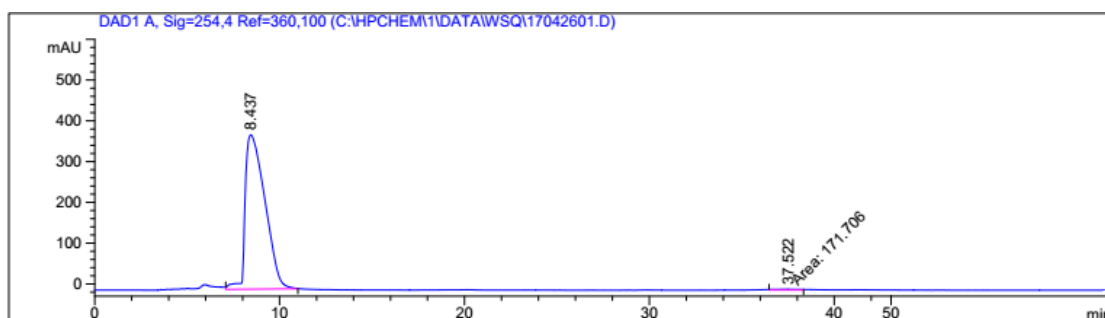

| Peak # | RetTime [min] | Type | Width [min] | Area [mAU*s] | Height [mAU] | Area %  |
|--------|---------------|------|-------------|--------------|--------------|---------|
| 1      | 8.437         | BB   | 0.9987      | 2.81896e4    | 378.57837    | 99.3946 |
| 2      | 37.522        | MM   | 1.6306      | 171.70578    | 1.75504      | 0.6054  |

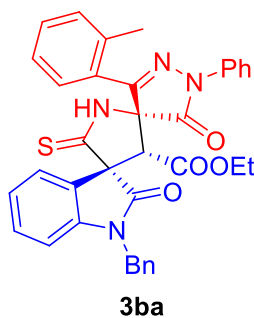

Prepared according to the general procedure within 7 h as white solid (105.6 mg, 86% yield) after silica gel chromatography (EtOAc/petroleum ether = 1/6).  $[\alpha]_{\text{D}}^{19} = 92.6$  ( $c$  0.43,  $\text{CH}_2\text{Cl}_2$ ); Mp 160.1-162.9 °C;  $^1\text{H}$  NMR (400 MHz, Chloroform- $d$ )  $\delta$  8.81 (s, 1H), 8.04 (dd,  $J = 8.7, 1.2$  Hz, 2H), 7.55 (d,  $J = 7.7$  Hz, 1H), 7.50-7.45 (m, 4H), 7.40 (d,  $J = 6.7$  Hz, 2H), 7.30-7.25 (m, 5H), 7.04 (td,  $J = 7.8, 1.1$  Hz, 1H), 6.65 (d,  $J = 7.9$  Hz, 1H), 6.43 (td,  $J = 7.6, 1.0$  Hz, 1H), 5.12 (s, 1H), 5.07 (dd,  $J = 7.7, 1.1$  Hz, 1H), 4.99 (d,  $J = 8.0$  Hz, 1H), 4.96 (d,  $J = 12.0$  Hz, 1H), 3.86-3.78 (m, 1H), 3.60-3.47 (m, 1H), 2.67 (s, 3H), 0.43 (t,  $J = 7.1$  Hz, 3H);  $^{13}\text{C}$  NMR (101 MHz, Chloroform- $d$ )  $\delta$  201.9, 168.3, 143.8, 139.2, 137.5, 135.2, 132.1, 130.7, 130.4, 129.1, 128.6, 127.7, 127.6, 127.5, 126.5, 125.9, 123.6, 122.7, 119.1, 109.4, 67.6, 61.4, 58.4, 44.7, 20.5, 13.0; HRMS (ESI)  $m/z$  Calcd. for  $\text{C}_{36}\text{H}_{31}\text{N}_4\text{O}_4\text{S}^+$  ( $[\text{M}+\text{H}]^+$ ) 615.2061, Found 615.2060; Enantiomeric excess was determined to be 98%

(determined by HPLC using chiral AD-H column, hexane/2-propanol = 70/30,  $\lambda$  = 254 nm, 30 °C, 0.8 mL/min,  $t_{\text{major}}$  = 9.0 min,  $t_{\text{minor}}$  = 40.8 min)

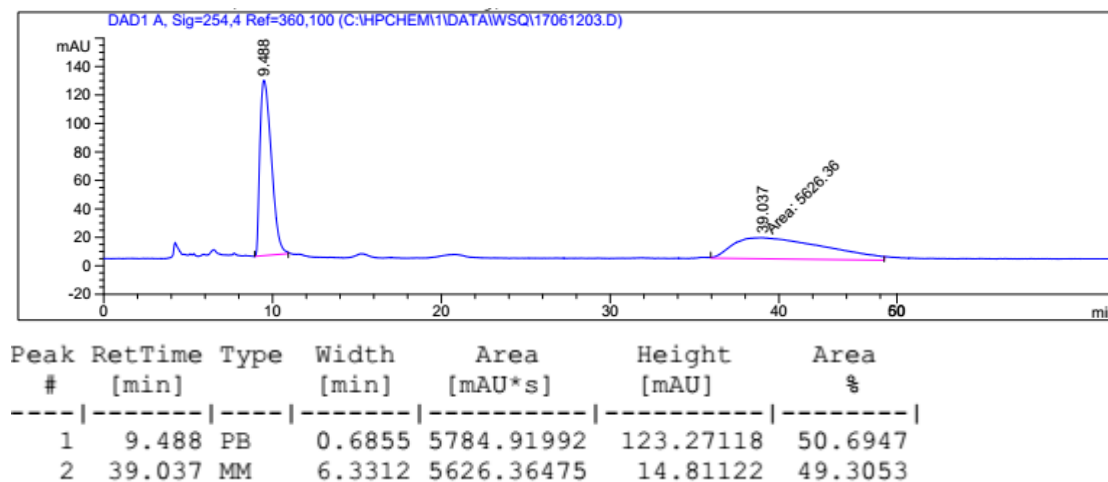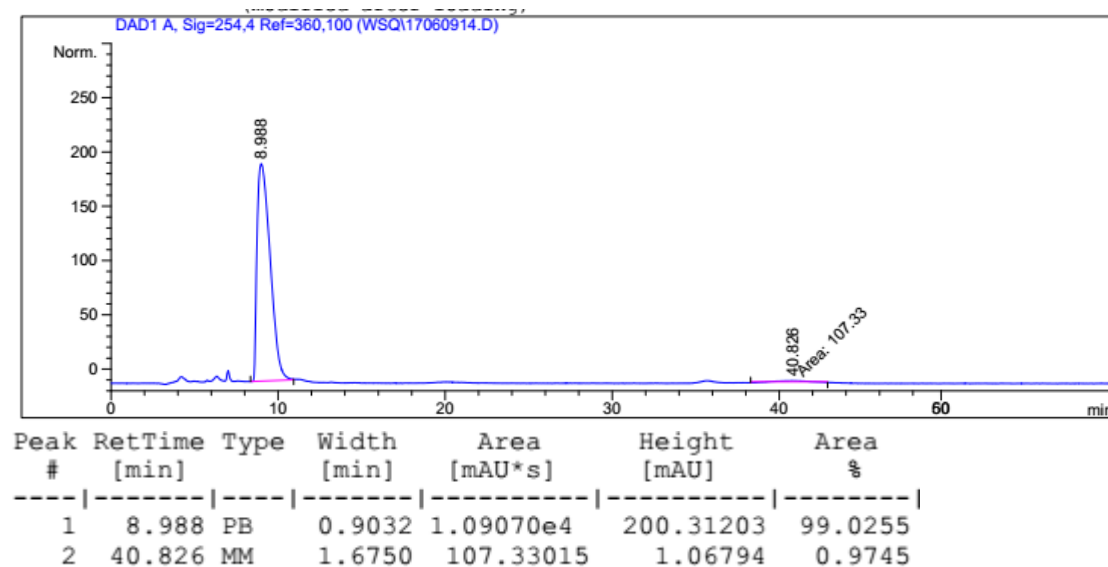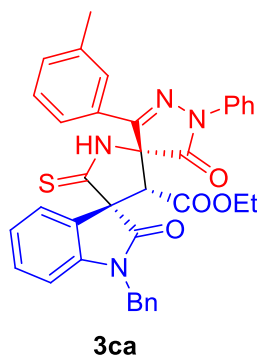

Prepared according to the general procedure within 7 h as white solid (110.5 mg, 90% yield) after silica gel chromatography (EtOAc/petroleum ether = 1/6).  $[\alpha]_{\text{D}}^{19} = 70.2$  ( $c$  0.64,  $\text{CH}_2\text{Cl}_2$ );  $\text{CH}_2\text{Cl}_2$ ; Mp 146.5-148.0 °C;  $^1\text{H}$  NMR (400 MHz,  $\text{CHloroform-}d$ )  $\delta$  8.85 (s, 1H), 8.06 (d,  $J$  = 8.1 Hz, 2H), 7.61 (d,  $J$  = 7.2 Hz, 2H), 7.46-7.38 (m 6H), 7.31-7.24 (m, 4H), 7.06 (t,  $J$  = 7.7 Hz, 1H), 6.66 (d,  $J$  = 7.8 Hz, 1H), 6.48 (t,  $J$  = 7.6 Hz, 1H), 5.29 (d,  $J$  = 7.6 Hz, 1H), 5.05 (s, 1H), 4.96 (s, 2H), 3.77-3.65 (m, 1H), 3.57-3.49 (m, 1H), 2.41 (s, 3H), 0.39 (t,  $J$  = 7.1 Hz, 3H);  $^{13}\text{C}$  NMR (101 MHz,  $\text{CHloroform-}d$ )  $\delta$  202.1, 168.9, 165.1, 158.0, 143.9, 139.0, 137.6, 135.2, 131.2, 131.1, 130.3, 129.2, 129.2, 129.1, 128.6, 127.6, 127.5, 126.9, 125.9, 123.7, 122.6, 119.1, 109.5, 61.4, 58.3, 44.7, 21.5, 13.0; HRMS (ESI)  $m/z$  Calcd. for  $\text{C}_{36}\text{H}_{31}\text{N}_4\text{O}_4\text{S}^+$  ( $[\text{M}+\text{H}]^+$ ) 615.2061, Found 615.2061; Enantiomeric excess was determined to be 99% (determined by

HPLC using chiral AD-H column, hexane/2-propanol = 70/30,  $\lambda$  = 254 nm, 30 °C, 0.8 mL/min,  $t_{\text{major}}$  = 9.4 min,  $t_{\text{minor}}$  = 35.8 min)

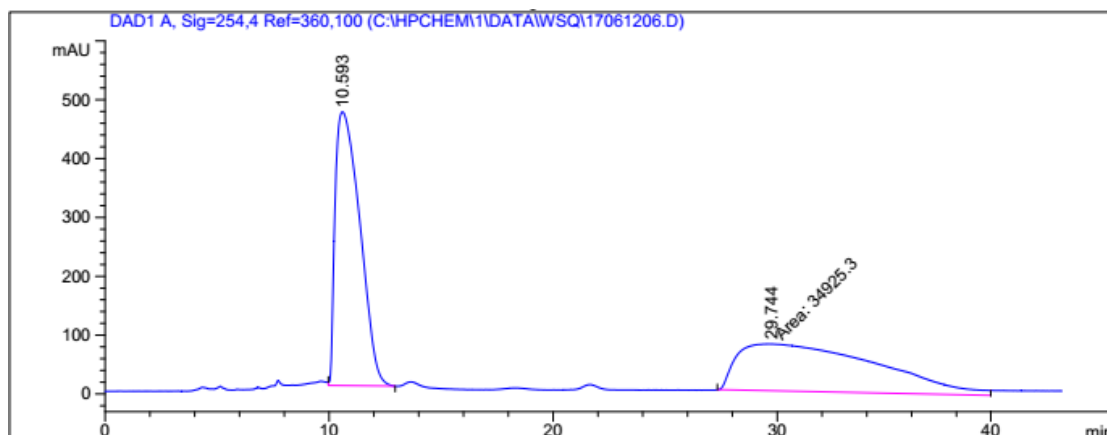

| Peak # | RetTime [min] | Type | Width [min] | Area [mAU*s] | Height [mAU] | Area %  |
|--------|---------------|------|-------------|--------------|--------------|---------|
| 1      | 10.594        | MM   | 1.2711      | 3.53410e4    | 463.37820    | 50.4437 |
| 2      | 29.582        | MM   | 7.0395      | 3.47193e4    | 82.20084     | 49.5563 |

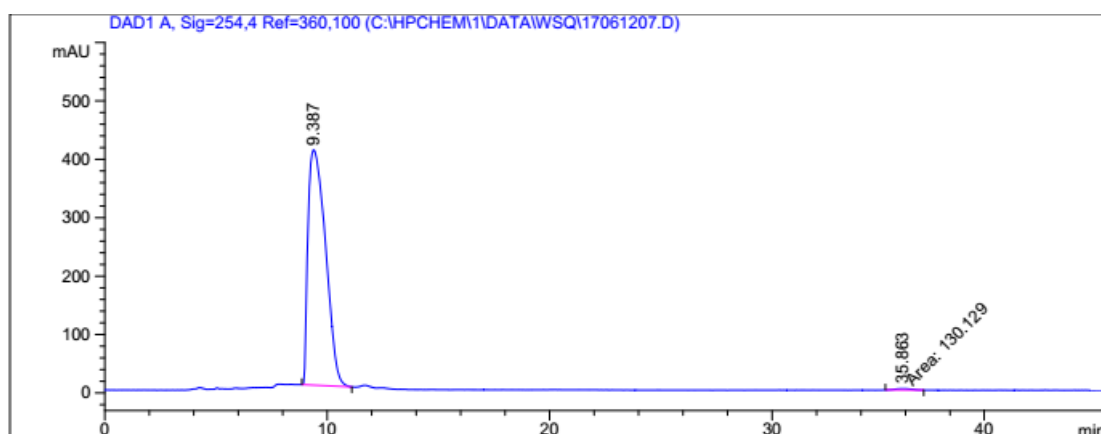

| Peak # | RetTime [min] | Type | Width [min] | Area [mAU*s] | Height [mAU] | Area %  |
|--------|---------------|------|-------------|--------------|--------------|---------|
| 1      | 9.387         | BB   | 0.8639      | 2.20894e4    | 402.76300    | 99.4143 |
| 2      | 35.863        | MM   | 0.8972      | 130.12935    | 2.41743      | 0.5857  |

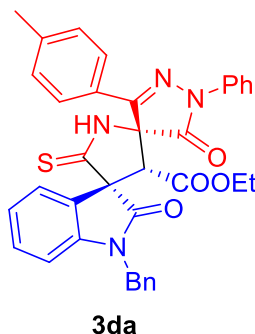

Prepared according to the general procedure within 7 h as white solid (106.8 mg, 87% yield) after silica gel chromatography (EtOAc/petroleum ether = 1/6).  $[\alpha]_{\text{D}}^{19}$  = 70.2 (*c* 0.64, CH<sub>2</sub>Cl<sub>2</sub>); Mp 146.5-148.0 °C; <sup>1</sup>H NMR (400 MHz, Chloroform-*d*)  $\delta$  8.90 (s, 1H), 8.06 (d, *J* = 8.0 Hz, 2H), 7.69 (d, *J* = 8.1 Hz, 2H), 7.47-7.35 (m, 6H), 7.29-7.23 (m, 4H), 7.06 (td, *J* = 7.8, 1.2 Hz, 1H), 6.66 (d, *J* = 7.8 Hz, 1H), 6.47 (td, *J* = 7.6, 1.0 Hz, 1H), 5.23 (dd, *J* = 7.8, 1.1 Hz, 1H), 5.05 (s, 1H), 5.00 (d, *J* = 16.0 Hz, 1H), 4.94 (d, *J* = 16.0 Hz, 1H), 3.75-3.65 (m, 1H), 3.57-3.49 (m, 1H), 2.48 (s, 3H), 0.38 (t, *J* = 7.1 Hz, 3H); <sup>13</sup>C NMR (101 MHz, Chloroform-*d*)  $\delta$  202.0, 168.9, 165.1, 143.9, 140.9, 137.6, 135.2, 129.9, 129.8, 129.2, 129.0, 128.6, 128.3, 127.6, 127.5, 125.8, 123.8, 122.5, 119.1, 109.5, 73.8, 68.1, 61.3, 58.3, 44.7, 21.5, 13.0; HRMS (ESI) *m/z* Calcd. for C<sub>36</sub>H<sub>31</sub>N<sub>4</sub>O<sub>4</sub>S<sup>+</sup> ([M+H]<sup>+</sup>) 615.2061, Found 615.2059; Enantiomeric excess was determined to be

99% (determined by HPLC using chiral AD-H column, hexane/2-propanol = 70/30,  $\lambda$  = 254 nm, 30 °C, 0.8 mL/min,  $t_{\text{major}}$  = 10.8 min,  $t_{\text{minor}}$  = 34.5 min).

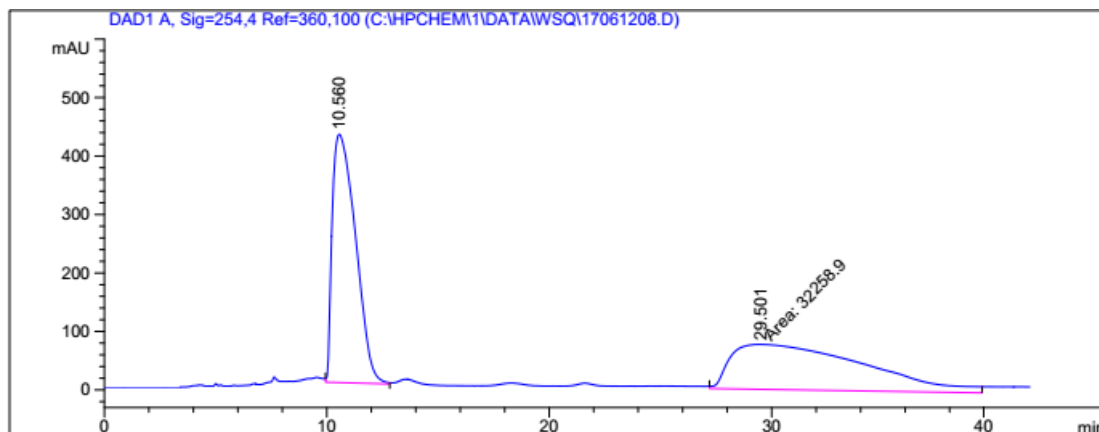

| Peak # | RetTime [min] | Type | Width [min] | Area [mAU*s] | Height [mAU] | Area %  |
|--------|---------------|------|-------------|--------------|--------------|---------|
| 1      | 10.560        | MM   | 1.1970      | 3.01423e4    | 419.70874    | 50.2956 |
| 2      | 29.501        | MM   | 6.8562      | 2.97880e4    | 72.41100     | 49.7044 |

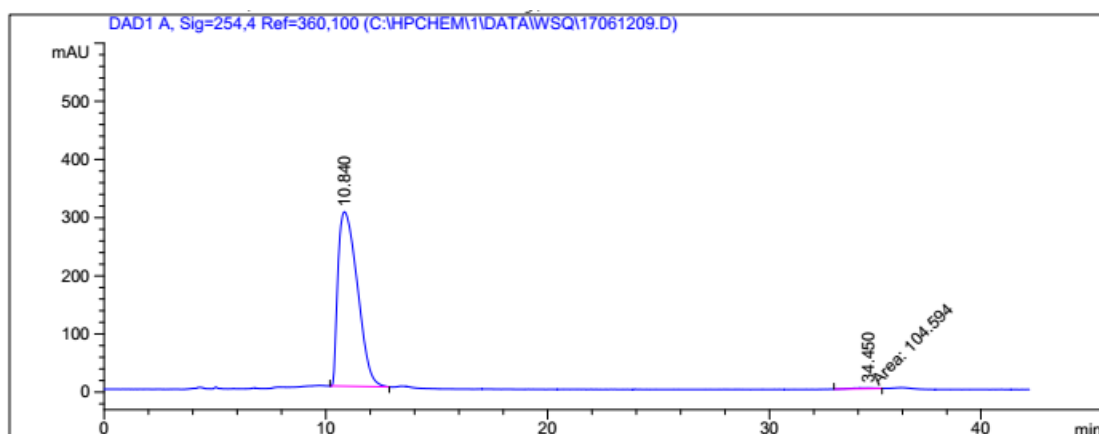

| Peak # | RetTime [min] | Type | Width [min] | Area [mAU*s] | Height [mAU] | Area %  |
|--------|---------------|------|-------------|--------------|--------------|---------|
| 1      | 10.840        | PB   | 0.9270      | 1.82658e4    | 299.72717    | 99.4306 |
| 2      | 34.450        | MM   | 1.3645      | 104.59440    | 1.27757      | 0.5694  |

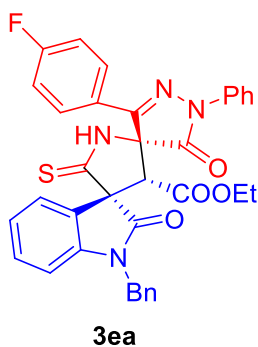

Prepared according to the general procedure within 5 h as white solid (107.5 mg, 87% yield) after silica gel chromatography (EtOAc/petroleum ether = 1/6).  $[\alpha]_{\text{D}}^{19} = 73.4$  ( $c$  1.36, CH<sub>2</sub>Cl<sub>2</sub>); Mp 150.1-153.7 °C; <sup>1</sup>H NMR (400 MHz, Chloroform-*d*)  $\delta$  9.36 (s, 1H), 8.00 (d,  $J$  = 7.8 Hz, 2H), 7.87-7.80 (m, 2H), 7.44-7.35 (m, 4H), 7.30-7.22 (m, 6H), 7.09 (td,  $J$  = 7.8, 1.2 Hz, 1H), 6.68 (d,  $J$  = 7.8 Hz, 1H), 6.56 (d,  $J$  = 7.6 Hz, 1H), 5.35 (dd,  $J$  = 7.8, 1.1 Hz, 1H), 5.05 (s, 1H), 4.98 (d,  $J$  = 16.0 Hz, 1H), 4.91 (d,  $J$  = 16.0 Hz, 1H), 3.72-3.64 (t, 1H), 3.55-3.47 (m, 1H), 0.36 (t,  $J$  = 7.2 Hz, 3H); <sup>19</sup>F NMR (470 MHz, Chloroform-*d*)  $\delta$  -109.09 (m). <sup>13</sup>C NMR (101 MHz, Chloroform-*d*)  $\delta$  201.8, 169.1, 165.2, 164.1 (d,  $J$  = 253.5 Hz), 157.2, 143.9, 135.1, 132.2 (d,  $J$  = 9.0 Hz), 129.4, 129.0, 128.6, 127.8, 127.7, 127.5, 125.9, 123.4, 122.7, 119.2, 116.3 (d,  $J$  = 21.2

(Hz), 109.7, 73.8, 68.3, 61.4, 58.4, 44.7, 13.0; HRMS (ESI)  $m/z$  Calcd. for  $C_{35}H_{28}FN_4O_4S^+$  ( $[M+H]^+$ ) 619.1810, Found 619.1810; Enantiomeric excess was determined to be 96% (determined by HPLC using chiral AD-H column, hexane/2-propanol = 70/30,  $\lambda$  = 254 nm, 30 °C, 0.8 mL/min,  $t_{major}$  = 15.3 min,  $t_{minor}$  = 66.9 min)

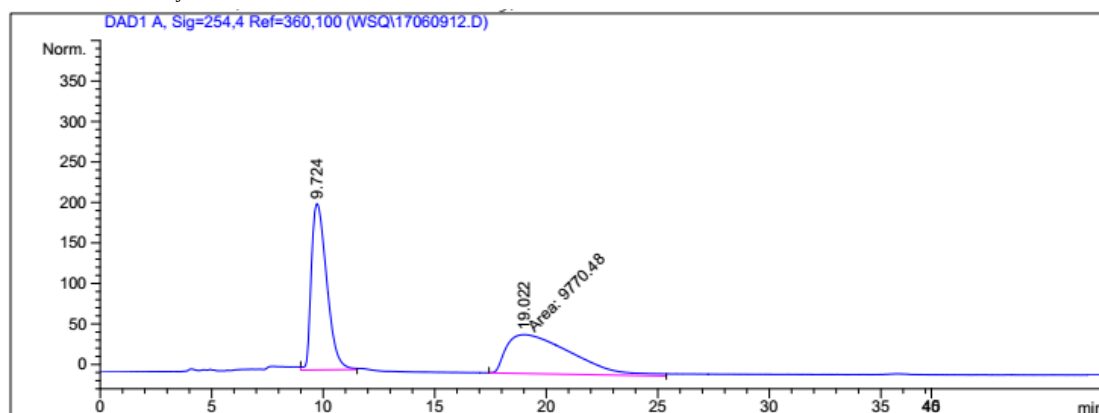

| Peak # | RetTime [min] | Type | Width [min] | Area [mAU*s] | Height [mAU] | Area %  |
|--------|---------------|------|-------------|--------------|--------------|---------|
| 1      | 9.724         | BB   | 0.7600      | 9850.43555   | 205.22461    | 50.2037 |
| 2      | 19.022        | MM   | 3.3859      | 9770.48145   | 48.09373     | 49.7963 |

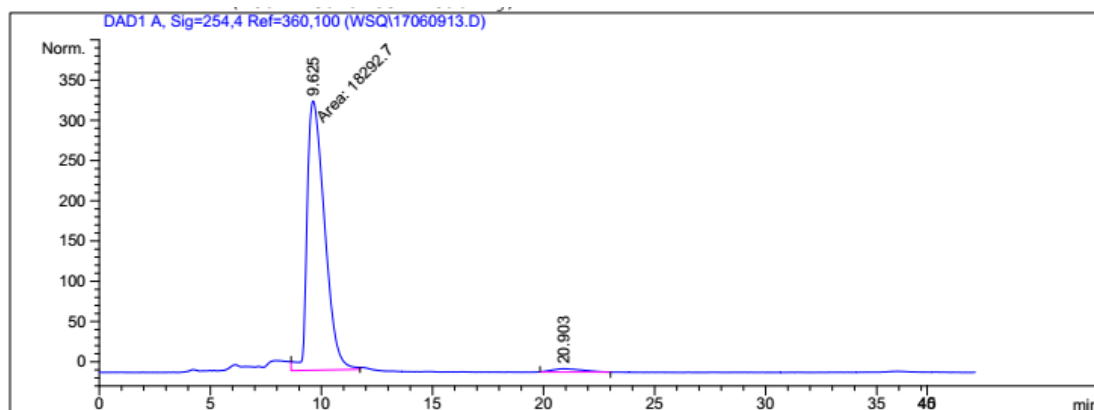

| Peak # | RetTime [min] | Type | Width [min] | Area [mAU*s] | Height [mAU] | Area %  |
|--------|---------------|------|-------------|--------------|--------------|---------|
| 1      | 9.625         | MM   | 0.9115      | 1.82927e4    | 334.47070    | 97.7859 |
| 2      | 20.903        | BB   | 1.1706      | 414.19626    | 4.21462      | 2.2141  |

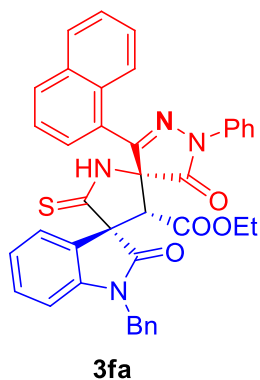

Prepared according to the general procedure within 18 h as white solid (110.5 mg, 85% yield) after silica gel chromatography (EtOAc/petroleum ether = 1/6).  $[\alpha]_D^{19} = 50.6$  ( $c$  0.36,  $CH_2Cl_2$ ); Mp 163.5-164.7 °C;  $^1H$  NMR (400 MHz, Chloroform- $d$ )  $\delta$  8.97 (s, 1H), 8.61 (d,  $J$  = 8.3 Hz, 1H), 8.06 (d,  $J$  = 8.2 Hz, 3H), 7.95 (d,  $J$  = 7.8 Hz, 1H), 7.77 (d,  $J$  = 7.2 Hz, 1H), 7.63-7.50 (m, 3H), 7.44 (t,  $J$  = 7.8 Hz, 2H), 7.34 (d,  $J$  = 7.0 Hz, 2H), 7.28-7.20 (m, 4H), 6.92 (t,  $J$  = 7.7 Hz, 1H), 6.56 (d,  $J$  = 7.8 Hz, 1H), 6.19 (t,  $J$  = 7.7 Hz, 1H), 5.14 (s, 1H), 4.92 (s, 2H), 4.81 (d,  $J$  = 7.7 Hz, 1H), 3.69-3.61 (m, 1H), 3.51-3.40 (m, 1H), 0.26 (t,  $J$  = 7.1 Hz, 3H);  $^{13}C$  NMR (101 MHz, Chloroform- $d$ )  $\delta$  202.2, 168.5, 165.1, 143.7, 137.5, 135.1,

134.2, 131.6, 131.1, 129.1, 128.9, 128.9, 128.6, 128.3, 127.8, 127.7, 127.6, 127.4, 127.3, 126.9, 126.6, 126.0, 125.2, 123.5, 122.4, 119.2, 109.4, 67.6, 61.4, 58.5, 44.7, 12.9; HRMS (ESI)  $m/z$  Calcd. for  $C_{39}H_{31}N_4O_4S^+$  ( $[M+H]^+$ ) 651.2061, Found 651.2060; Enantiomeric excess was determined to be 99% (determined by HPLC using chiral AD-H column, hexane/2-propanol = 70/30,  $\lambda$  = 254 nm, 30 °C, 0.8 mL/min,  $t_{major}$  = 9.9 min,  $t_{minor}$  = 69.9 min).

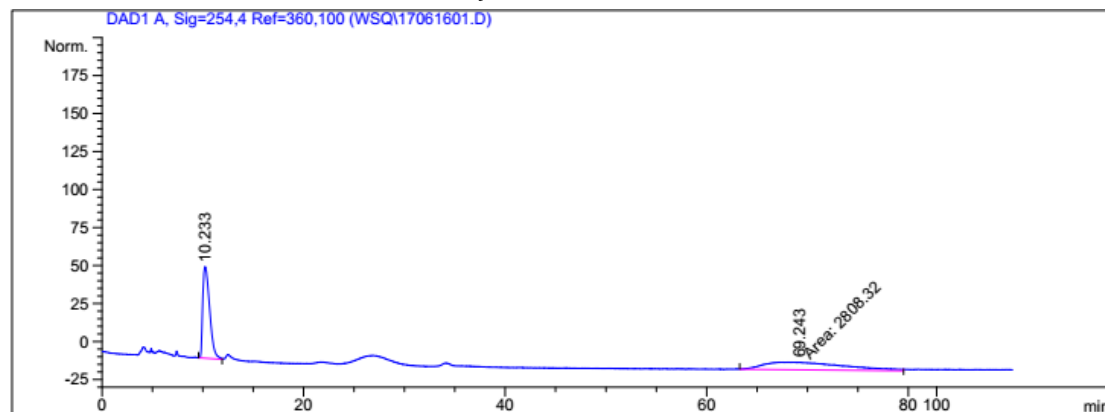

| Peak # | RetTime [min] | Type | Width [min] | Area [mAU*s] | Height [mAU] | Area %  |
|--------|---------------|------|-------------|--------------|--------------|---------|
| 1      | 10.233        | PB   | 0.7628      | 2878.66675   | 60.10473     | 50.6184 |
| 2      | 69.243        | MM   | 9.3852      | 2808.32495   | 4.98717      | 49.3816 |

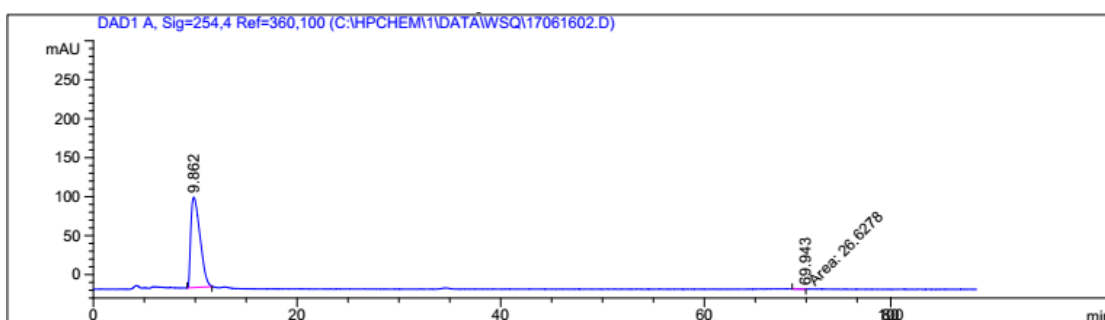

| Peak # | RetTime [min] | Type | Width [min] | Area [mAU*s] | Height [mAU] | Area %  |
|--------|---------------|------|-------------|--------------|--------------|---------|
| 1      | 9.862         | BB   | 0.8759      | 7265.90674   | 115.82347    | 99.6349 |
| 2      | 69.943        | MM   | 0.8497      | 26.62778     | 5.22281e-1   | 0.3651  |

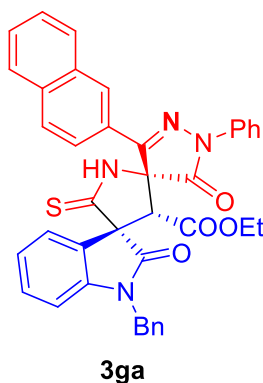

Prepared according to the general procedure within 7 h as white solid (113.1 mg, 87% yield) after silica gel chromatography (EtOAc/petroleum ether = 1/6).  $[\alpha]_D^{19}$  = 61.0 ( $c$  0.73,  $CH_2Cl_2$ ); Mp 150.1-153.1 °C;  $^1H$  NMR (400 MHz, Chloroform- $d$ )  $\delta$  8.98 (s, 1H), 8.26 (s, 1H), 8.12 (d,  $J$  = 8.1 Hz, 2H), 8.01 (q,  $J$  = 8.6 Hz, 2H), 7.90 (dd,  $J$  = 20.0, 8.2 Hz, 2H), 7.60 (t,  $J$  = 7.5 Hz, 1H), 7.50-7.44 (m, 3H), 7.41-7.33 (m, 2H), 7.28-7.21 (m, 4H), 6.91 (t,  $J$  = 7.7 Hz, 1H), 6.60 (d,  $J$  = 7.8 Hz, 1H), 5.98 (t,  $J$  = 7.6 Hz, 1H), 5.35 (d,  $J$  = 7.7 Hz, 1H), 5.10 (s, 1H), 4.94 (s, 2H), 3.69-3.58 (m, 1H), 3.57-3.45 (m, 1H), 0.34 (t,  $J$  = 7.1 Hz, 3H);  $^{13}C$  NMR (101 MHz, Chloroform- $d$ )  $\delta$  202.1, 174.7, 169.0, 165.2, 157.6, 143.8, 137.6, 135.1, 133.9, 129.4, 129.1, 129.1, 129.0, 128.7, 128.6, 127.7, 127.6, 127.6, 127.5, 127.0, 126.2, 125.9, 123.7, 122.4, 119.2, 109.5, 73.8, 68.3, 61.3, 58.5, 44.7, 12.9; HRMS (ESI)

m/z Calcd. for  $C_{39}H_{31}N_4O_4S^+$  ( $[M+H]^+$ ) 651.2061, Found 651.2058; Enantiomeric excess was determined to be 99% (determined by HPLC using chiral AD-H column, hexane/2-propanol = 70/30,  $\lambda$  = 254 nm, 30 °C, 0.8 mL/min,  $t_{major}$  = 11.4 min,  $t_{minor}$  = 72.7 min)

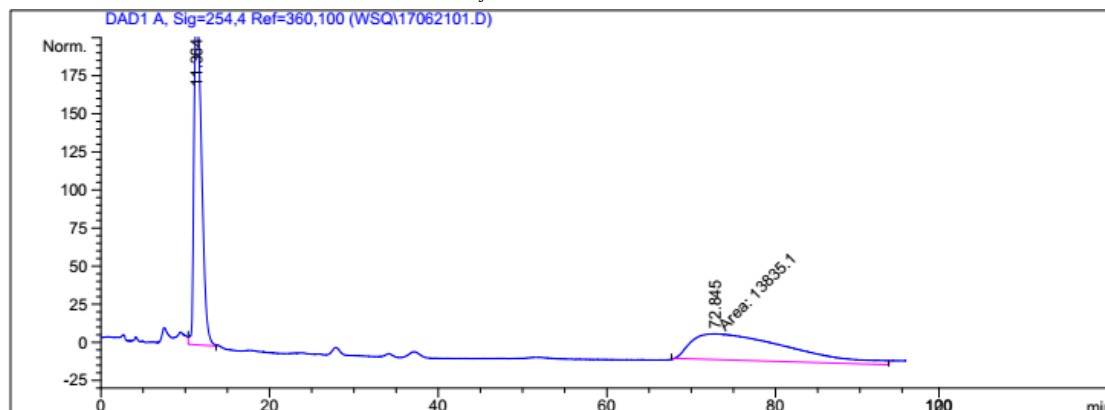

| Peak # | RetTime [min] | Type | Width [min] | Area [mAU*s] | Height [mAU] | Area %  |
|--------|---------------|------|-------------|--------------|--------------|---------|
| 1      | 11.364        | VB   | 0.9819      | 1.38567e4    | 221.49254    | 50.0390 |
| 2      | 72.845        | MM   | 13.5739     | 1.38351e4    | 16.98738     | 49.9610 |

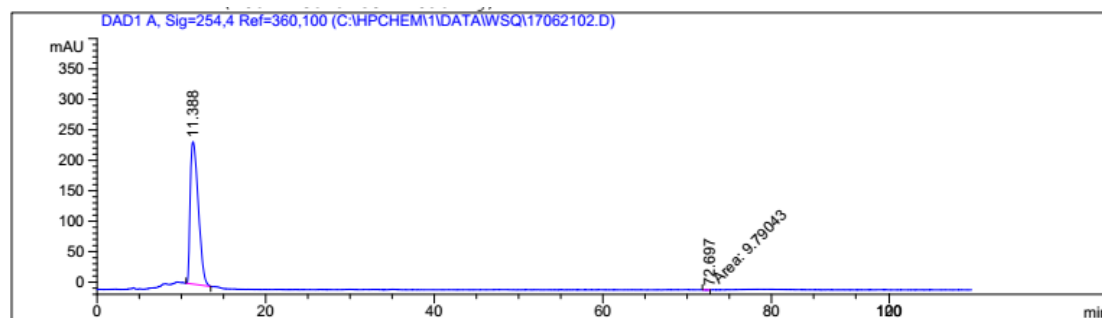

| Peak # | RetTime [min] | Type | Width [min] | Area [mAU*s] | Height [mAU] | Area %  |
|--------|---------------|------|-------------|--------------|--------------|---------|
| 1      | 11.388        | BB   | 0.9503      | 1.56004e4    | 233.84885    | 99.9373 |
| 2      | 72.697        | MM   | 0.3188      | 9.79043      | 5.11898e-1   | 0.0627  |

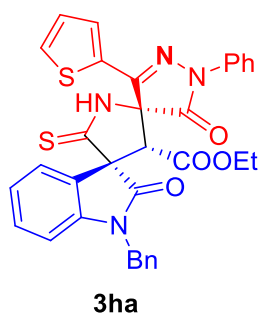

Prepared according to the general procedure within 15 h as white solid (93.2 mg, 77% yield) after silica gel chromatography (EtOAc/petroleum ether = 1/6).  $[\alpha]_D^{19}$  = 68.8 ( $c$  0.32,  $CH_2Cl_2$ ); Mp 146.1-148.7 °C;  $^1H$  NMR (400 MHz, Chloroform- $d$ )  $\delta$  8.74 (s, 1H), 8.03 (d,  $J$  = 8.0 Hz, 2H), 7.62 (d,  $J$  = 5.1 Hz, 1H), 7.55 (d,  $J$  = 3.7 Hz, 1H), 7.46-7.39 (m, 4H), 7.31-7.24 (m, 4H), 7.20 (t,  $J$  = 4.4 Hz, 1H), 7.11 (t,  $J$  = 7.8 Hz, 1H), 6.79-6.57 (m, 2H), 5.80 (d,  $J$  = 7.6 Hz, 1H), 5.02 (d,  $J$  = 12.0 Hz, 1H), 4.99 (s, 1H), 4.95 (d,  $J$  = 12.0 Hz, 1H), 3.73-3.48 (m, 2H), 0.40 (t,  $J$  = 7.1 Hz, 3H);  $^{13}C$  NMR (101 MHz, Chloroform- $d$ )  $\delta$  202.1, 165.0, 153.4, 144.0, 137.4, 135.1, 130.5, 129.5, 129.0, 128.6, 127.89, 127.9, 127.5, 125.9, 124.0, 122.7, 119.1, 109.7, 73.5, 68.3, 61.5, 58.8, 44.7, 13.0; HRMS (ESI)

m/z Calcd. for  $C_{33}H_{27}N_4O_4S^+$  ( $[M+H]^+$ ) 607.1468, Found 607.1464; Enantiomeric excess was determined to be 79% (determined by HPLC using chiral AD-H column, hexane/2-propanol = 70/30,  $\lambda$  = 254 nm, 30 °C, 0.8 mL/min,  $t_{major}$  = 11.7 min,  $t_{minor}$  = 64.4 min)

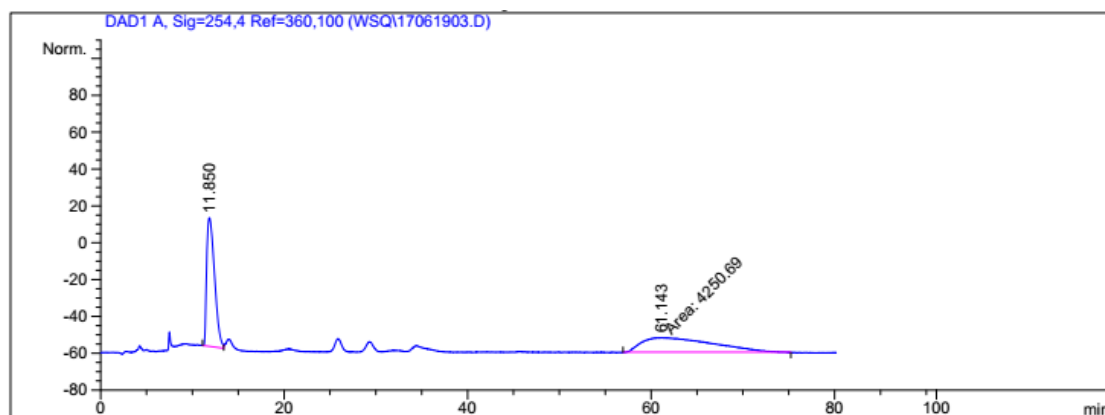

| Peak # | RetTime [min] | Type | Width [min] | Area [mAU*s] | Height [mAU] | Area %  |
|--------|---------------|------|-------------|--------------|--------------|---------|
| 1      | 11.850        | BV   | 0.9290      | 4171.83545   | 69.82580     | 49.5319 |
| 2      | 61.143        | MM   | 8.9578      | 4250.69287   | 7.90870      | 50.4681 |

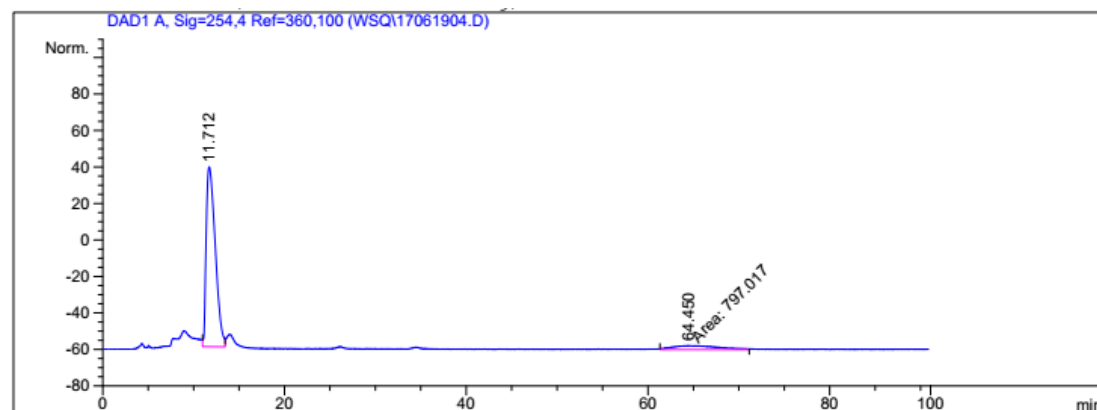

| Peak # | RetTime [min] | Type | Width [min] | Area [mAU*s] | Height [mAU] | Area %  |
|--------|---------------|------|-------------|--------------|--------------|---------|
| 1      | 11.712        | VV   | 1.0677      | 6860.05957   | 98.59518     | 89.5911 |
| 2      | 64.450        | MM   | 5.7894      | 797.01672    | 2.29449      | 10.4089 |

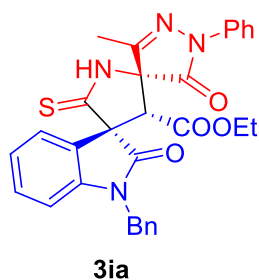

Prepared according to the general procedure within 2 h as white solid (97.9 mg, 91% yield) after silica gel chromatography (EtOAc/petroleum ether = 1/6).  $[\alpha]_D^{19} = 85.3$  (*c* 0.91, CH<sub>2</sub>Cl<sub>2</sub>); Mp 230.1-233.7 °C; <sup>1</sup>H NMR (400 MHz, Chloroform-*d*) δ 8.79 (s, 1H), 7.95 (d, *J* = 7.8 Hz, 2H), 7.46-7.37 (m, 4H), 7.36-7.20 (m, 6H), 7.09-7.00 (m, 1H), 6.80 (d, *J* = 7.8 Hz, 1H), 5.08 (d, *J* = 16.0 Hz, 1H), 4.99 (s, 1H), 4.95 (d, *J* = 16.0 Hz, 1H), 3.79-3.71 (m, 1H), 3.65-3.52 (m, 1H), 2.55 (s, 3H), 0.45 (t, *J* = 7.1 Hz, 3H); <sup>13</sup>C NMR (101 MHz, Chloroform-*d*) δ 201.6, 174.2, 169.0, 165.6, 157.6, 144.1, 137.4, 135.1, 129.8, 129.0, 128.7, 128.5, 127.8, 127.6, 125.7, 123.2, 123.1, 118.9, 110.0, 73.3, 68.4, 61.6, 57.6, 44.7, 16.9, 13.0. HRMS (ESI) *m/z* Calcd. for C<sub>30</sub>H<sub>27</sub>N<sub>4</sub>O<sub>4</sub>S<sup>+</sup> ([M+H]<sup>+</sup>) 539.1748, Found 539.1747; Enantiomeric excess was determined to be 99% (determined by HPLC using chiral AD-H column, hexane/2-propanol = 70/30, λ = 254 nm, 30 °C, 0.8 mL/min, *t*<sub>major</sub> = 15.1 min, *t*<sub>minor</sub> = 32.5 min)

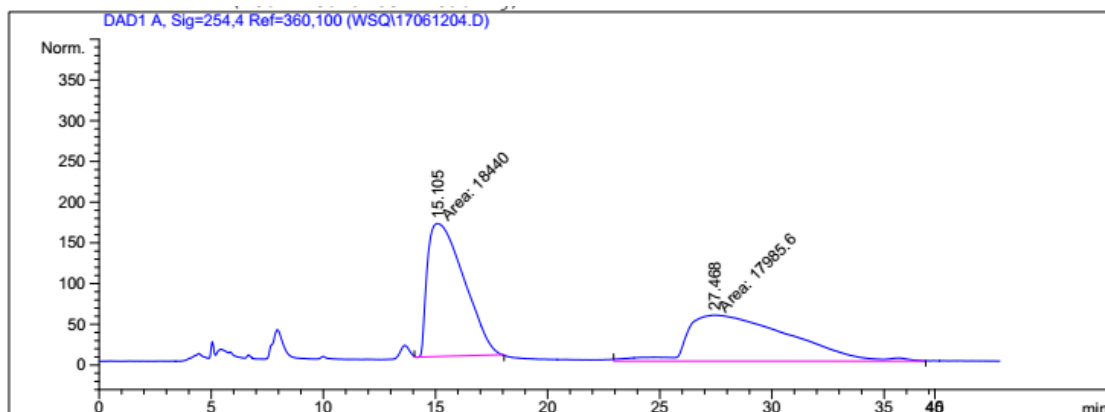

| Peak # | RetTime [min] | Type | Width [min] | Area [mAU*s] | Height [mAU] | Area %  |
|--------|---------------|------|-------------|--------------|--------------|---------|
| 1      | 15.105        | MM   | 1.8828      | 1.84400e4    | 163.23233    | 50.6237 |
| 2      | 27.468        | MM   | 5.3149      | 1.79856e4    | 56.40002     | 49.3763 |

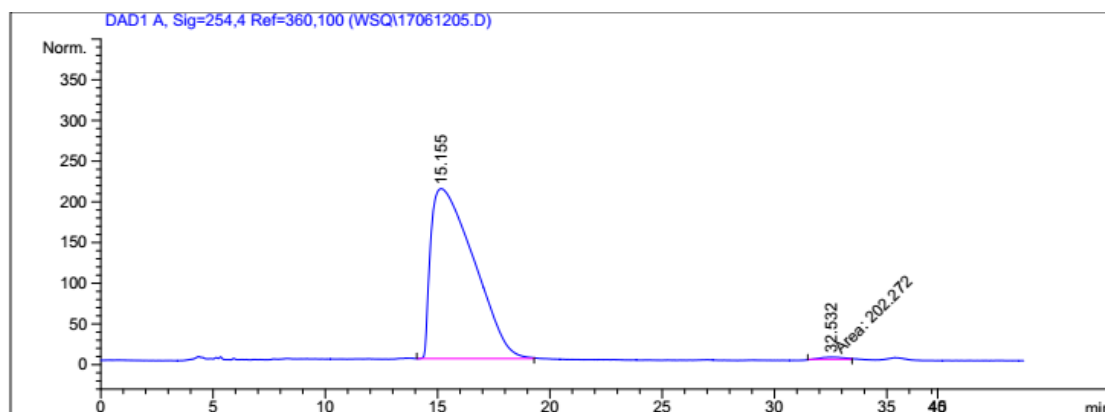

| Peak # | RetTime [min] | Type | Width [min] | Area [mAU*s] | Height [mAU] | Area %  |
|--------|---------------|------|-------------|--------------|--------------|---------|
| 1      | 15.155        | PB   | 1.8259      | 2.77879e4    | 208.63281    | 99.2773 |
| 2      | 32.532        | MM   | 1.2038      | 202.27237    | 2.80043      | 0.7227  |

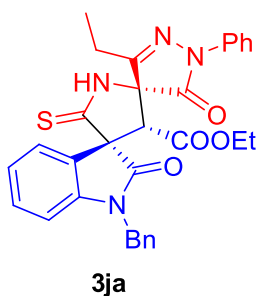

Prepared according to the general procedure within 2 h as white solid (100.5 mg, 91% yield) after silica gel chromatography (EtOAc/petroleum ether = 1/6).  $[\alpha]_D^{19} = 85.5$  (c 0.91,  $\text{CH}_2\text{Cl}_2$ ); Mp 180.1-182.0 °C;  $^1\text{H}$  NMR (400 MHz,  $\text{CHCl}_3$ )  $\delta$  8.98 (s, 1H), 8.00 (d,  $J = 8.2$  Hz, 2H), 7.47-7.18 (m, 11H), 7.07 (t,  $J = 7.6$  Hz, 1H), 6.81 (d,  $J = 7.9$  Hz, 1H), 5.07 (d,  $J = 16.0$  Hz, 2H), 5.01 (s, 1H), 4.95 (d,  $J = 16.0$  Hz, 1H), 3.79-3.71 (m, 1H), 3.62-3.54 (m, 1H), 2.88 (q,  $J = 7.2$  Hz, 2H), 1.48 (t,  $J = 7.1$  Hz, 3H), 0.47 (t,  $J = 7.1$  Hz, 3H);  $^{13}\text{C}$  NMR (101 MHz,  $\text{CHCl}_3$ )  $\delta$  201.5, 165.7, 161.4, 144.1, 137.6, 135.1, 129.8, 128.9, 128.7, 128.7, 127.7, 127.6, 125.6, 123.4, 123.2, 119.0, 110.0, 73.6, 68.6, 61.6, 57.7, 44.7, 24.0, 13.1, 9.40; HRMS (ESI)  $m/z$  Calcd. for  $\text{C}_{31}\text{H}_{29}\text{N}_4\text{O}_4\text{S}^+$  ( $[\text{M}+\text{H}]^+$ ) 553.1904, Found 553.1904; Enantiomeric excess was determined to be 99% (determined by HPLC using chiral AD-H column, hexane/2-propanol = 70/30,  $\lambda = 254$  nm, 30 °C, 0.8 mL/min,  $t_{\text{major}} = 11.5$  min,  $t_{\text{minor}} = 35.3$  min).

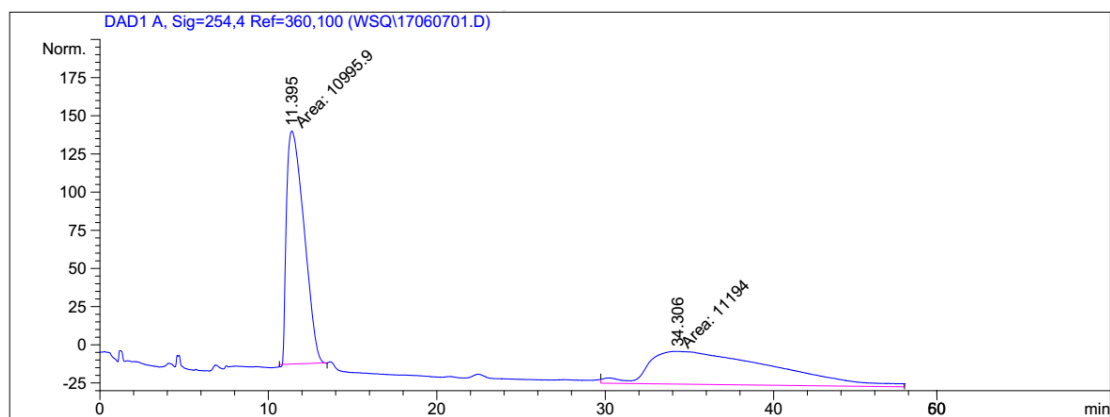

| Peak # | RetTime [min] | Type | Width [min] | Area [mAU*s] | Height [mAU] | Area %  |
|--------|---------------|------|-------------|--------------|--------------|---------|
| 1      | 11.395        | MM   | 1.2003      | 1.09959e4    | 152.68690    | 49.5536 |
| 2      | 34.306        | MM   | 8.6825      | 1.11940e4    | 21.48764     | 50.4464 |

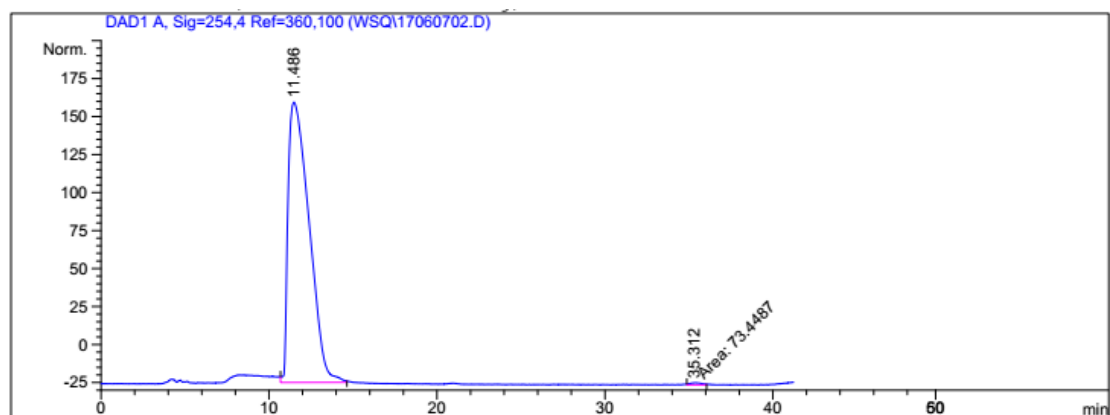

| Peak # | RetTime [min] | Type | Width [min] | Area [mAU*s] | Height [mAU] | Area %  |
|--------|---------------|------|-------------|--------------|--------------|---------|
| 1      | 11.486        | BB   | 1.3098      | 1.60314e4    | 184.47820    | 99.5439 |
| 2      | 35.312        | MM   | 0.8494      | 73.44873     | 1.44117      | 0.4561  |

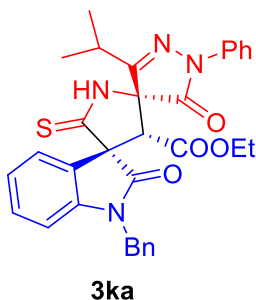

Prepared according to the general procedure within 3 h as white solid (101.9 mg, 90% yield) after silica gel chromatography (EtOAc/petroleum ether = 1/6).  $[\alpha]_D^{25} = 96.1$  ( $c$  1.06,  $\text{CH}_2\text{Cl}_2$ ); Mp 125.1-130.7 °C;  $^1\text{H}$  NMR (400 MHz, Chloroform- $d$ )  $\delta$  8.63 (s, 1H), 8.00 (d,  $J$  = 8.1 Hz, 2H), 7.49-7.37 (m, 4H), 7.35-7.23 (m, 6H), 7.07 (t,  $J$  = 7.6 Hz, 1H), 6.81 (d,  $J$  = 7.9 Hz, 1H), 5.10 (d,  $J$  = 16.0 Hz, 1H), 5.01 (s, 1H), 4.95 (d,  $J$  = 16.0 Hz, 1H), 3.80-3.72 (m, 1H), 3.62-3.54 (m, 1H), 3.16-3.10 (m, 1H), 1.55 (d,  $J$  = 6.6 Hz, 3H), 1.47 (d,  $J$  = 7.0 Hz, 3H), 0.48 (t,  $J$  = 7.1 Hz, 3H);  $^{13}\text{C}$  NMR (101 MHz, Chloroform- $d$ )  $\delta$  201.2, 174.2, 168.8, 165.6, 164.4, 144.2, 137.6, 135.1, 129.8, 128.9, 128.7, 127.7, 127.6, 125.6, 123.1, 123.1, 118.8, 110.0, 73.6, 68.4, 61.54, 57.9, 44.7, 30.4, 22.6, 19.7, 13.0; HRMS (ESI)  $m/z$  Calcd. for  $\text{C}_{32}\text{H}_{31}\text{N}_4\text{O}_4\text{S}^+$  ( $[\text{M}+\text{H}]^+$ ) 567.2061, Found 567.2057; Enantiomeric excess was determined to be 99% (determined by HPLC using chiral AD-H column, hexane/2-propanol = 70/30,  $\lambda$  = 254 nm, 30 °C, 0.8 mL/min,  $t_{\text{major}}$  = 10.2 min,  $t_{\text{minor}}$  = 72.0 min)

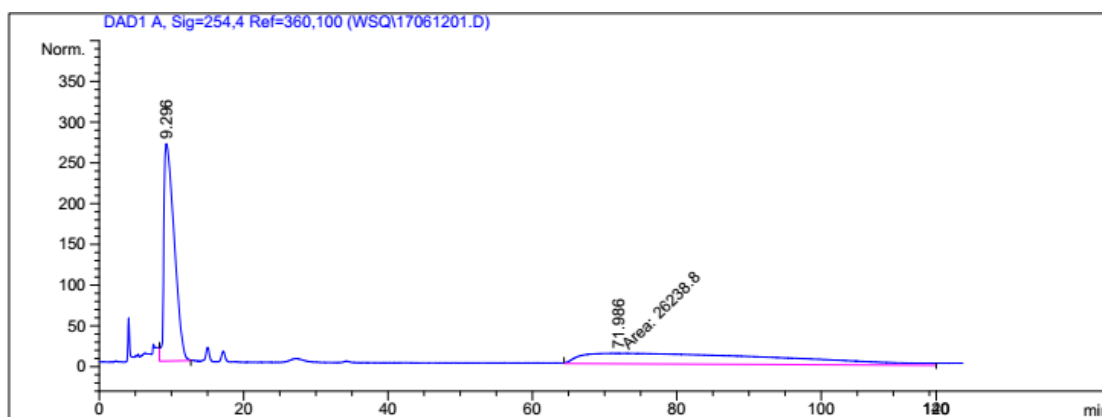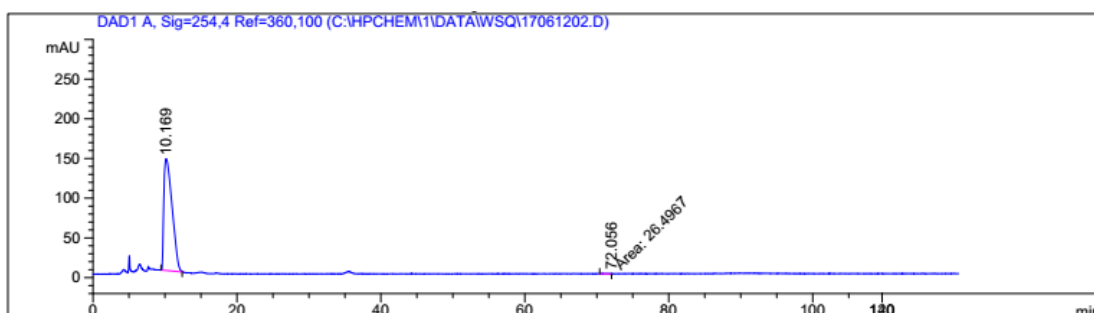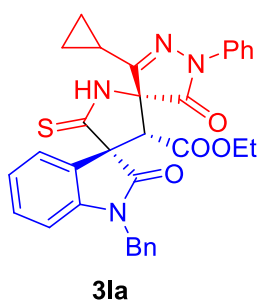

Prepared according to the general procedure within 2 h as white solid (106.0 mg, 94% yield) after silica gel chromatography (EtOAc/petroleum ether = 1/6).  $[\alpha]_D^{19} = 64.2$  ( $c$  0.45,  $\text{CH}_2\text{Cl}_2$ ); Mp 147.1-150.9 °C;  $^1\text{H}$  NMR (400 MHz,  $\text{CHCl}_3$ )  $\delta$  8.52 (s, 1H), 7.94 (d,  $J = 8.0$  Hz), 7.47-7.38 (m, 5H), 7.34-7.19 (m, 5H), 7.02 (t,  $J = 7.6$  Hz, 1H), 6.81 (d,  $J = 7.9$  Hz, 1H), 5.10 (d,  $J = 16.0$  Hz, 1H), 5.02 (s, 1H), 4.98 (d,  $J = 16.0$  Hz, 1H), 3.82-3.76 (m, 1H), 3.64-3.56 (m, 1H), 1.99-1.92 (m, 1H), 1.49-1.38 (m, 1H), 1.34-1.26 (m, 1H), 1.24-1.10 (m, 2H), 0.49 (t,  $J = 7.1$  Hz, 3H);  $^{13}\text{C}$  NMR (101 MHz,  $\text{CHCl}_3$ )  $\delta$  174.3, 169.0, 165.5, 161.8, 144.2, 135.2, 129.7, 128.9, 128.7, 127.7, 127.6, 125.6, 123.3, 122.9, 118.8, 110.0, 73.7, 68.2, 61.5, 57.7, 44.7, 13.1, 11.0, 9.3, 9.2; HRMS (ESI)  $m/z$  Calcd. for  $\text{C}_{32}\text{H}_{29}\text{N}_4\text{O}_4\text{S}^+$  ( $[\text{M}+\text{H}]^+$ ) 565.1904, Found 565.1906; Enantiomeric excess was determined to be 98% (determined by HPLC using chiral AD-H column, hexane/2-propanol = 70/30,  $\lambda = 254$  nm, 30 °C, 0.8 mL/min,  $t_{\text{major}} = 12.1$  min,  $t_{\text{minor}} = 47.1$  min)

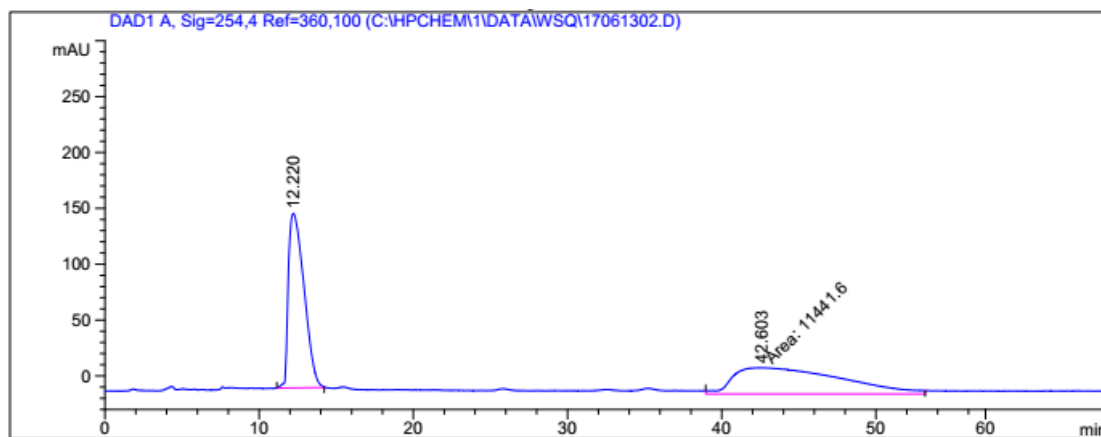

| Peak # | RetTime [min] | Type | Width [min] | Area [mAU*s] | Height [mAU] | Area %  |
|--------|---------------|------|-------------|--------------|--------------|---------|
| 1      | 12.215        | BB   | 1.1112      | 1.10930e4    | 156.45311    | 50.0533 |
| 2      | 42.603        | MM   | 8.3663      | 1.10693e4    | 22.05153     | 49.9467 |

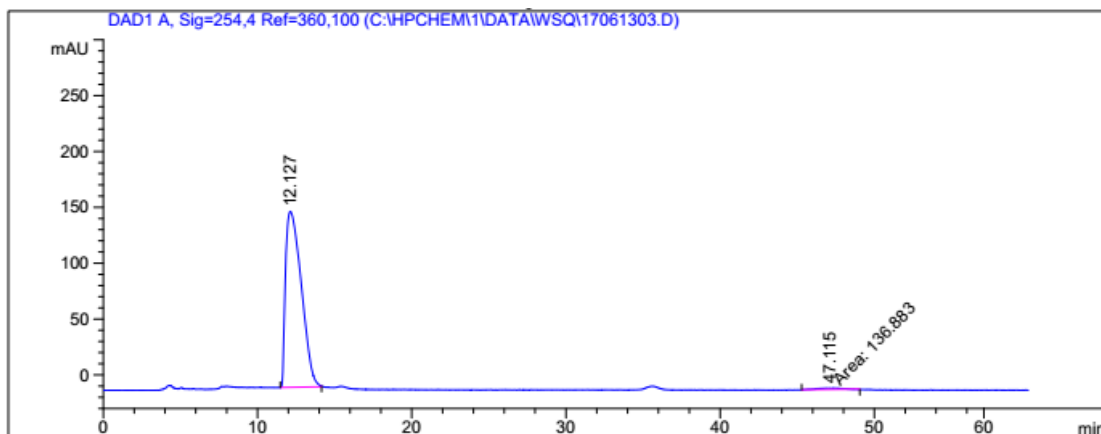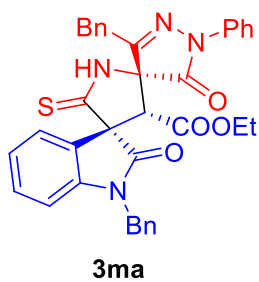

Prepared according to the general procedure within 2 h as white solid (106.0 mg, 94% yield) after silica gel chromatography (EtOAc/petroleum ether = 1/6).  $[\alpha]_D^{19} = 38.3$  (*c* 0.68, CH<sub>2</sub>Cl<sub>2</sub>); Mp 156.1-157.9 °C; <sup>1</sup>H NMR (400 MHz, Chloroform-*d*) δ 8.47 (s, 1H), 7.84 (d, *J* = 8.1 Hz, 2H), 7.46 (t, *J* = 6.9 Hz, 3H), 7.41 (d, *J* = 7.3 Hz, 2H), 7.36 (t, *J* = 7.5 Hz, 2H), 7.33-7.23 (m, 7H), 7.14 (t, *J* = 7.4 Hz, 1H), 7.07 (t, *J* = 7.6 Hz, 1H), 6.81 (d, *J* = 7.9 Hz, 1H), 5.06 (d, *J* = 15.8 Hz, 2H), 4.91 (d, *J* = 15.7 Hz, 1H), 4.33 (d, *J* = 16.4 Hz, 1H), 4.14 (d, *J* = 16.4 Hz, 1H), 3.84-3.70 (m, 1H), 3.67-3.53 (m, 1H), 0.47 (t, *J* = 7.1 Hz, 3H); <sup>13</sup>C NMR (101 MHz, Chloroform-*d*) δ 201.2, 174.4, 169.2, 166.0, 159.9, 144.3, 137.5, 135.1, 134.5, 129.9, 129.9, 128.9, 128.7, 128.7, 127.7, 127.6, 127.2, 125.5, 123.4, 123.2, 118.8, 110.1, 73.6, 68.5, 61.7, 58.3, 44.8, 36.8, 13.1; HRMS (ESI) *m/z* Calcd. for C<sub>36</sub>H<sub>31</sub>N<sub>4</sub>O<sub>4</sub>S<sup>+</sup> ([M+H]<sup>+</sup>) 615.2061, Found 615.2058; Enantiomeric excess was determined to be 99% (determined by HPLC using chiral AD-H column, hexane/2-propanol = 70/30, λ = 254 nm, 30 °C, 0.8 mL/min, *t*<sub>major</sub> = 14.2 min, *t*<sub>minor</sub> = 27.2 min)

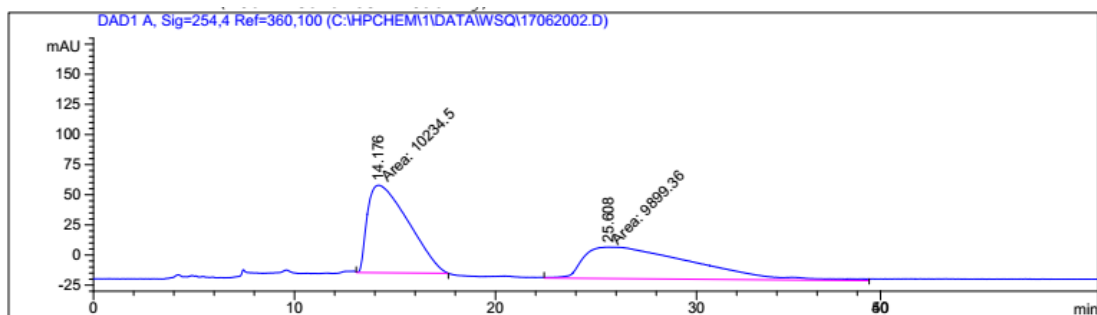

| Peak # | RetTime [min] | Type | Width [min] | Area [mAU*s] | Height [mAU] | Area %  |
|--------|---------------|------|-------------|--------------|--------------|---------|
| 1      | 14.176        | MM   | 2.3496      | 1.02345e4    | 72.59669     | 50.8324 |
| 2      | 25.608        | MM   | 6.3125      | 9899.36230   | 26.13711     | 49.1676 |

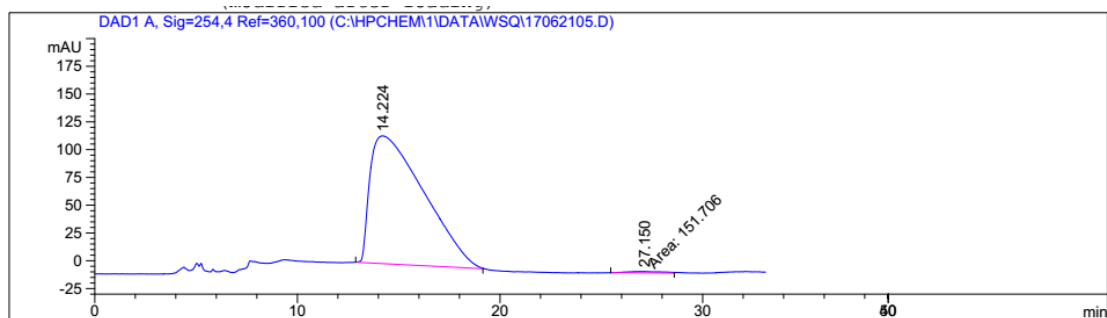

| Peak # | RetTime [min] | Type | Width [min] | Area [mAU*s] | Height [mAU] | Area %  |
|--------|---------------|------|-------------|--------------|--------------|---------|
| 1      | 14.224        | BB   | 2.1593      | 2.12533e4    | 115.04453    | 99.2913 |
| 2      | 27.150        | MM   | 1.9634      | 151.70618    | 1.28780      | 0.7087  |

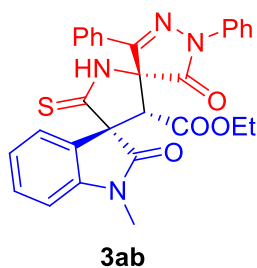

Prepared according to the general procedure within 8 h as white solid (89.08 mg, 85% yield) after silica gel chromatography (EtOAc/petroleum ether = 1/6).  $[\alpha]_D^{19} = 105.1$  ( $c$  0.87,  $\text{CH}_2\text{Cl}_2$ ); Mp 241.3-243.4 °C;  $^1\text{H}$  NMR (400 MHz, Chloroform- $d$ )  $\delta$  8.93 (s, 1H), 8.02 (dd,  $J = 8.7, 1.2$  Hz, 2H), 7.77 (dt,  $J = 6.9, 1.6$  Hz, 2H), 7.63-7.53 (m, 3H), 7.43 (t,  $J = 8.0$  Hz, 2H), 7.29-7.22 (m, 1H), 7.17 (td,  $J = 7.8, 1.2$  Hz, 1H), 6.78 (d,  $J = 7.8$  Hz, 1H), 6.48 (td,  $J = 7.6, 1.1$  Hz, 1H), 5.17 (d,  $J = 7.6$  Hz, 1H), 4.92 (s, 1H), 3.72-3.66 (m, 1H), 3.62-3.54 (m, 1H), 3.23 (s, 3H), 0.52 (t,  $J = 7.1$  Hz, 3H);  $^{13}\text{C}$  NMR (101 MHz, Chloroform- $d$ )  $\delta$  202.1, 174.3, 165.0, 157.9, 144.7, 131.2, 130.5, 129.9, 129.4, 129.2, 129.0, 127.6, 125.9, 123.6, 122.6, 119.1, 108.3, 73.7, 68.1, 61.3, 58.2, 27.3, 13.1; HRMS (ESI)  $m/z$  Calcd. for  $\text{C}_{29}\text{H}_{25}\text{N}_4\text{O}_4\text{S}^+$  ( $[\text{M}+\text{H}]^+$ ) 525.1591, Found 525.1587; Enantiomeric excess was determined to be 99% (determined by HPLC using chiral AD-H column, hexane/2-propanol = 70/30,  $\lambda = 254$  nm, 30 °C, 0.8 mL/min,  $t_{\text{major}} = 10.0$  min,  $t_{\text{minor}} = 16.4$  min).

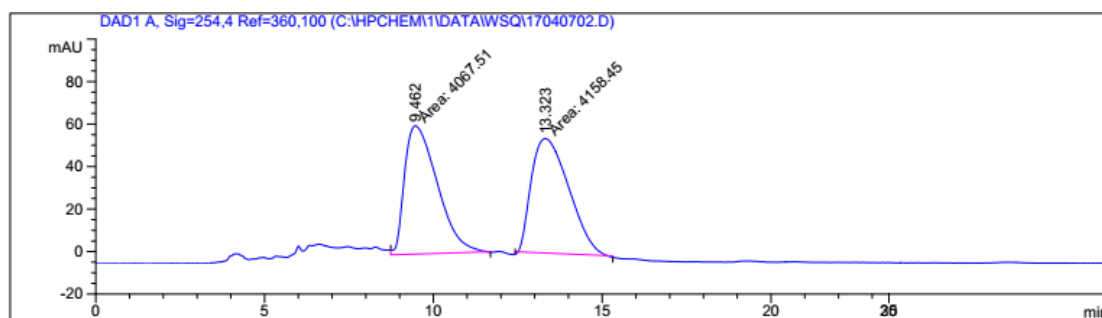

| Peak # | RetTime [min] | Type | Width [min] | Area [mAU*s] | Height [mAU] | Area %  |
|--------|---------------|------|-------------|--------------|--------------|---------|
| 1      | 9.462         | MM   | 1.1233      | 4067.50562   | 60.35198     | 49.4472 |
| 2      | 13.323        | MM   | 1.2866      | 4158.45312   | 53.86988     | 50.5528 |

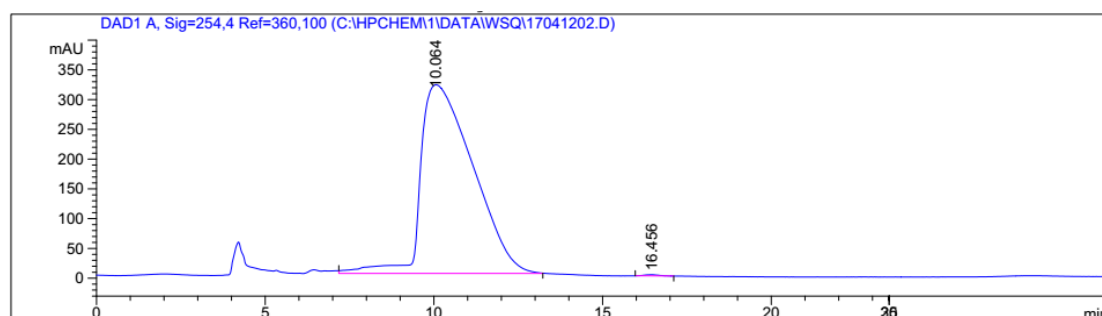

| Peak # | RetTime [min] | Type | Width [min] | Area [mAU*s] | Height [mAU] | Area %  |
|--------|---------------|------|-------------|--------------|--------------|---------|
| 1      | 10.064        | BB   | 1.4284      | 3.43626e4    | 317.07639    | 99.8165 |
| 2      | 16.456        | BB   | 0.3679      | 63.18171     | 2.02546      | 0.1835  |

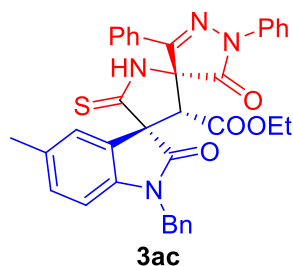

Prepared according to the general procedure within 6 h as white solid (104.4 mg, 85% yield) after silica gel chromatography (EtOAc/petroleum ether = 1/6).  $[\alpha]_D^{19} = 91.5$  ( $c$  1.03,  $\text{CH}_2\text{Cl}_2$ ); Mp 152.5-154.2 °C;  $^1\text{H}$  NMR (400 MHz, Chloroform- $d$ )  $\delta$  9.03 (s, 1H), 8.00 (d,  $J = 7.8$  Hz, 2H), 7.81-7.75 (m, 2H), 7.57-7.49 (m, 3H), 7.38 (dd,  $J = 8.6, 7.4$  Hz, 2H), 7.35-7.30 (m, 2H), 7.25-7.14 (m, 4H), 6.80 (d,  $J = 7.9$  Hz, 1H), 6.48 (d,  $J = 8.0$  Hz, 1H), 5.07 (d,  $J = 1.6$  Hz, 1H), 5.00 (s, 1H), 4.90 (d,  $J = 16.0$  Hz, 1H), 4.85 (d,  $J = 16.0$  Hz, 1H), 3.72-3.64 (m, 1H), 3.50-3.42 (m, 1H), 1.75 (s, 3H), 0.31 (t,  $J = 7.1$  Hz, 3H);  $^{13}\text{C}$  NMR (101 MHz, Chloroform- $d$ )  $\delta$  202.3, 174.6, 169.0, 165.1, 141.4, 137.6, 135.3, 132.1, 130.7, 130.1, 129.5, 129.1, 128.6, 127.7, 127.6, 127.5, 125.9, 124.6, 119.2, 109.3, 73.8, 68.3, 61.3, 58.4, 44.7, 20.9, 12.9. HRMS (ESI)  $m/z$  Calcd. for  $\text{C}_{36}\text{H}_{31}\text{N}_4\text{O}_4\text{S}^+$  ( $[\text{M}+\text{H}]^+$ ) 615.2061, Found 615.2053; Enantiomeric excess was determined to be 99% (determined by HPLC using chiral AD-H column, hexane/2-propanol = 70/30,  $\lambda = 254$  nm, 30 °C, 0.8 mL/min,  $t_{\text{major}} = 11.9$  min,  $t_{\text{minor}} = 28.1$  min)

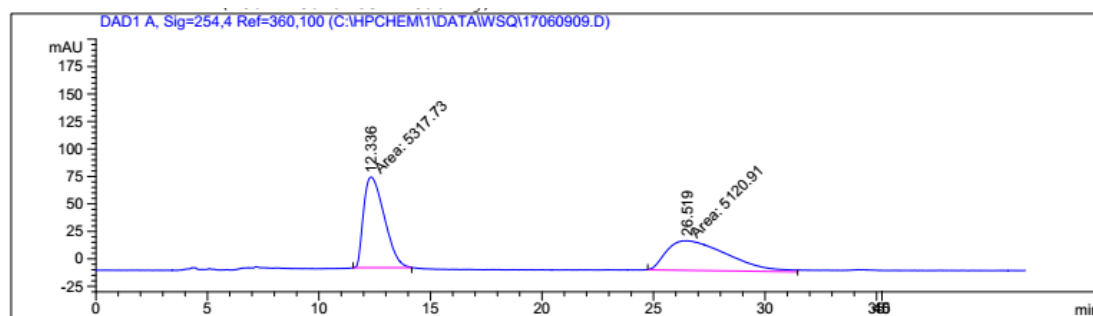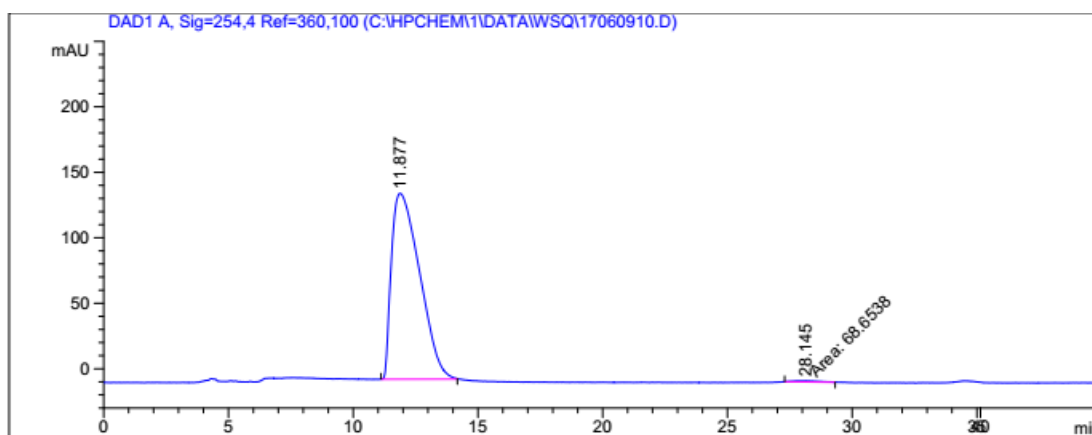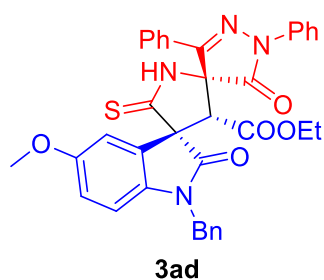

Prepared according to the general procedure within 6 h as white solid (107.1 mg, 87% yield) after silica gel chromatography (EtOAc/petroleum ether = 1/6).  $[\alpha]_D^{19} = 77.8$  (*c* 1.09, CH<sub>2</sub>Cl<sub>2</sub>); Mp 156.7-157.8 °C; <sup>1</sup>H NMR (400 MHz, Chloroform-*d*) δ 9.06 (s, 1H), 7.86 (dd, *J* = 6.5, 2.7 Hz, 2H), 7.59-7.49 (m, 3H), 7.41 (t, *J* = 7.9 Hz, 2H), 7.36 (d, *J* = 6.7 Hz, 2H), 7.29-7.21 (m, 4H), 6.60 (dd, *J* = 8.6, 2.4 Hz, 1H), 6.54 (d, *J* = 8.5 Hz, 1H), 5.31 (d, *J* = 2.4 Hz, 1H), 5.07 (s, 1H), 4.95 (d, *J* = 16.0 Hz, 1H), 4.87 (d, *J* = 16.0 Hz, 1H) 3.69-3.63 (m, 1H), 3.58-3.50 (m, 1H), 3.31 (s, 3H), 0.41 (t, *J* = 7.1 Hz, 3H); <sup>13</sup>C NMR (101 MHz, Chloroform-*d*) δ 201.9, 174.4, 169.2, 165.1, 157.9, 155.9, 137.3, 135.2, 131.6, 130.8, 129.4, 129.2, 129.0, 128.6, 127.6, 127.5, 125.8, 119.1, 114.3, 111.7, 109.9, 73.7, 68.7, 61.4, 58.6, 56.0, 44.8, 13.0; HRMS (ESI) *m/z* Calcd. for C<sub>36</sub>H<sub>31</sub>N<sub>4</sub>O<sub>5</sub>S<sup>+</sup> ([M+H]<sup>+</sup>) 631.2010, Found 631.2003; Enantiomeric excess was determined to be 99% (determined by HPLC using chiral AD-H column, hexane/2-propanol = 70/30, λ = 254 nm, 30 °C, 0.8 mL/min, *t*<sub>major</sub> = 12.6 min, *t*<sub>minor</sub> = 51.5 min)

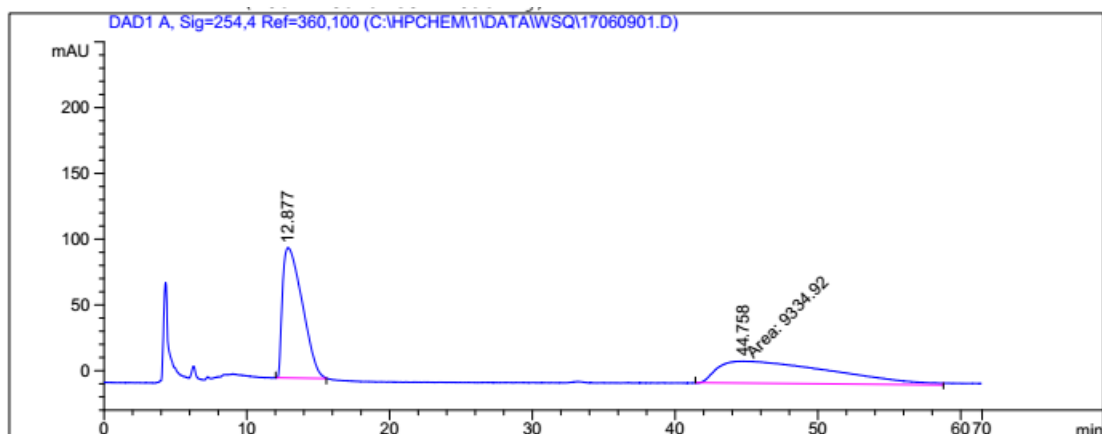

| Peak # | RetTime [min] | Type | Width [min] | Area [mAU*s] | Height [mAU] | Area %  |
|--------|---------------|------|-------------|--------------|--------------|---------|
| 1      | 12.877        | PB   | 1.1415      | 9530.04785   | 99.13946     | 50.5255 |
| 2      | 44.758        | MM   | 9.0985      | 9331.81738   | 17.09408     | 49.4745 |

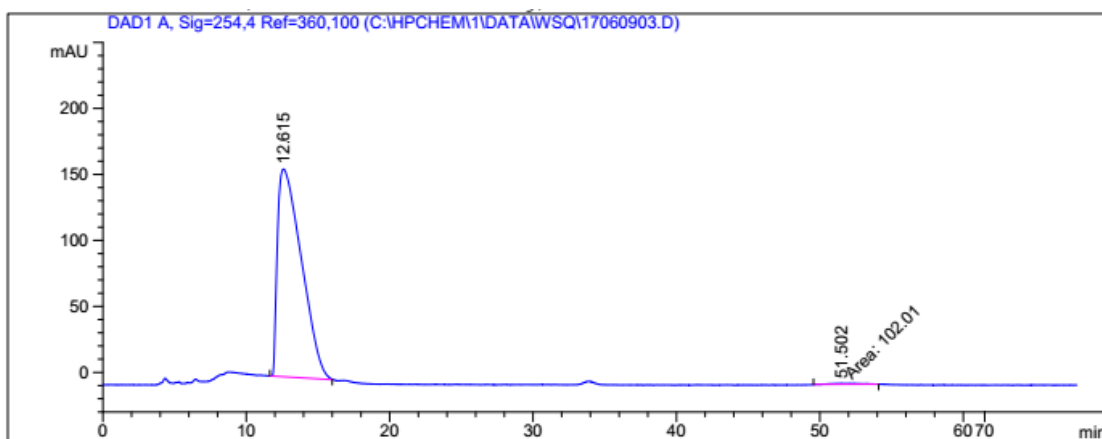

| Peak # | RetTime [min] | Type | Width [min] | Area [mAU*s] | Height [mAU] | Area %  |
|--------|---------------|------|-------------|--------------|--------------|---------|
| 1      | 12.615        | BB   | 1.3756      | 1.82280e4    | 157.34109    | 99.4435 |
| 2      | 51.502        | MM   | 2.1500      | 102.00994    | 7.90771e-1   | 0.5565  |

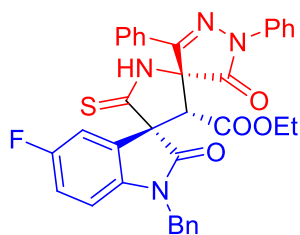

**3ae**

Prepared according to the general procedure within 30 min as white solid (101.1 mg, 82% yield) after silica gel chromatography (EtOAc/petroleum ether = 1/6).  $[\alpha]_D^{20} = 88.8$  ( $c$  1.09,  $\text{CH}_2\text{Cl}_2$ ); Mp 151.9-152.2 °C;  $^1\text{H}$  NMR (400 MHz, Chloroform- $d$ )  $\delta$  8.98 (s, 1H), 8.03-7.97 (m, 2H), 7.79-7.71 (m, 2H), 7.61 (t,  $J$  = 7.4 Hz, 1H), 7.53 (t,  $J$  = 7.4 Hz, 2H), 7.39 (t,  $J$  = 8.0 Hz, 2H), 7.35-7.29 (m, 2H), 7.26-7.20 (m, 4H), 6.72 (td,  $J$  = 8.6, 2.6 Hz, 1H), 6.52 (dd,  $J$  = 8.6, 4.2 Hz, 1H), 5.03 (s, 1H), 4.92 (d,  $J$  = 16.0, 1H), 4.87 (d,  $J$  = 16.0, 1H), 4.79 (dd,  $J$  = 8.7, 2.6 Hz, 1H), 3.80-3.71 (m, 1H), 3.59-3.51 (dq,  $J$  = 10.7, 7.1 Hz, 1H), 0.43 (t,  $J$  = 7.1 Hz, 3H).  $^{19}\text{F}$  NMR (470 MHz, Chloroform- $d$ )  $\delta$  -119.19 (m);  $^{13}\text{C}$  NMR (101 MHz, Chloroform- $d$ )  $\delta$  115.47 (d,  $J$  = 23.5 Hz), 112.10 (d,  $J$  = 26.9 Hz), 109.99 (d,  $J$  = 7.9 Hz).  $^{13}\text{C}$  NMR (101 MHz, Chloroform- $d$ )  $\delta$  201.2, 174.4, 168.7, 164.8, 159.9, 157.80, 157.5, 139.8, 137.5, 134.8, 131.1, 130.8, 129.9, 129.4, 129.1, 128.7, 127.8, 127.5, 125.9, 119.1,  $\delta$  115.5 (d,  $J$  = 23.5 Hz), 112.1 (d,  $J$  = 27.3 Hz), 110.0 (d,  $J$  = 8.1 Hz), 73.9, 68.2, 61.56, 58.0, 44.8, 13.1; HRMS (ESI)  $m/z$  Calcd. for  $\text{C}_{35}\text{H}_{28}\text{FN}_4\text{O}_4\text{S}^+$

([M+H]<sup>+</sup>) 619.1810, Found 619.1807; Enantiomeric excess was determined to be 99% (determined by HPLC using chiral AD-H column, hexane/2-propanol = 70/30,  $\lambda$  = 254 nm, 30 °C, 0.8 mL/min,  $t_{\text{major}}$  = 10.9 min,  $t_{\text{minor}}$  = 31.0 min)

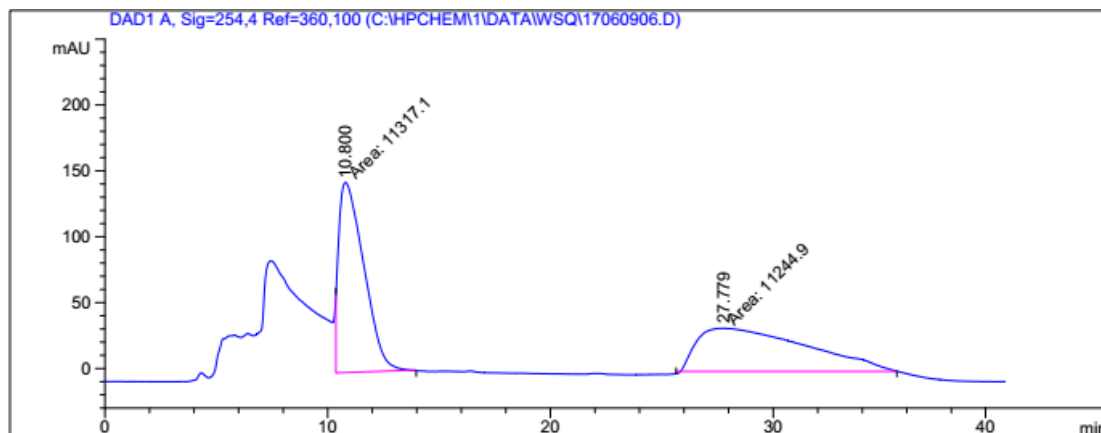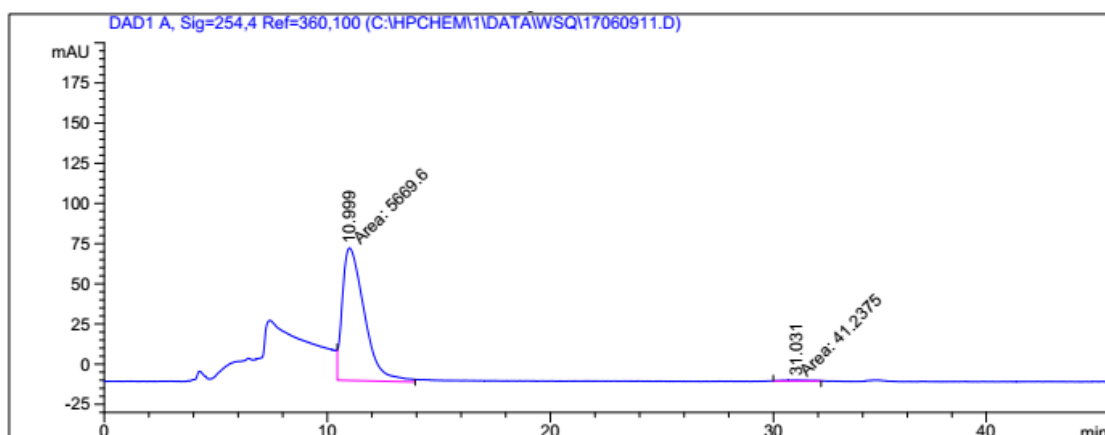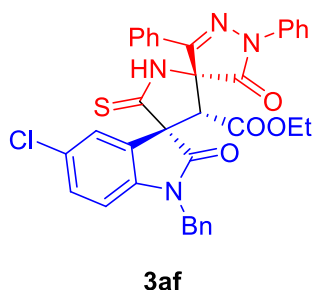

Prepared according to the general procedure within 15 min as white solid (101.4 mg, 80% yield) after silica gel chromatography (EtOAc/petroleum ether = 1/6).  $[\alpha]_{\text{D}}^{19}$  = 92.0 ( $c$  1.09,  $\text{CH}_2\text{Cl}_2$ ); Mp 156.7-157.8 °C;  $^1\text{H}$  NMR (400 MHz,  $\text{CHloroform-}d$ )  $\delta$  9.00 (s, 1H), 7.99 (d,  $J$  = 8.2 Hz, 2H), 7.73 (d,  $J$  = 7.4 Hz, 2H), 7.61 (t,  $J$  = 7.4 Hz, 1H), 7.53 (t,  $J$  = 7.6 Hz, 2H), 7.37 (t,  $J$  = 7.9 Hz, 2H), 7.32-7.28 (m, 2H), 7.26-7.16 (m, 5H), 6.99 (dd,  $J$  = 8.4, 2.0 Hz, 1H), 6.52 (d,  $J$  = 8.4 Hz, 1H), 5.10 (d,  $J$  = 2.0 Hz, 1H), 5.01 (s, 1H), 4.91 (d,  $J$  = 16.0 Hz, 1H), 4.85 (d,  $J$  = 16.0 Hz, 1H), 3.80-3.72 (m, 1H), 3.56-3.48 (m, 1H), 0.40 (t,  $J$  = 7.1 Hz, 3H);  $^{13}\text{C}$  NMR (101 MHz,  $\text{CHloroform-}d$ )  $\delta$  201.0, 174.3, 168.7, 164.8, 157.8, 142.4, 134.7, 131.6, 130.6, 129.8, 129.3, 129.3, 129.3, 129.1, 128.7, 128.0, 127.8, 127.5, 125.9, 124.3, 119.1, 110.5,

73.8, 67.9, 61.6, 58.0, 44.8, 13.1; HRMS (ESI)  $m/z$  Calcd. for  $C_{35}H_{28}ClN_4O_4S^+$  ( $[M+H]^+$ ) 635.1514, Found 635.1514; Enantiomeric excess was determined to be 94% (determined by HPLC using chiral AD-H column, hexane/2-propanol = 70/30,  $\lambda$  = 254 nm, 30 °C, 0.8 mL/min,  $t_{major}$  = 11.8 min,  $t_{minor}$  = 27.3 min)

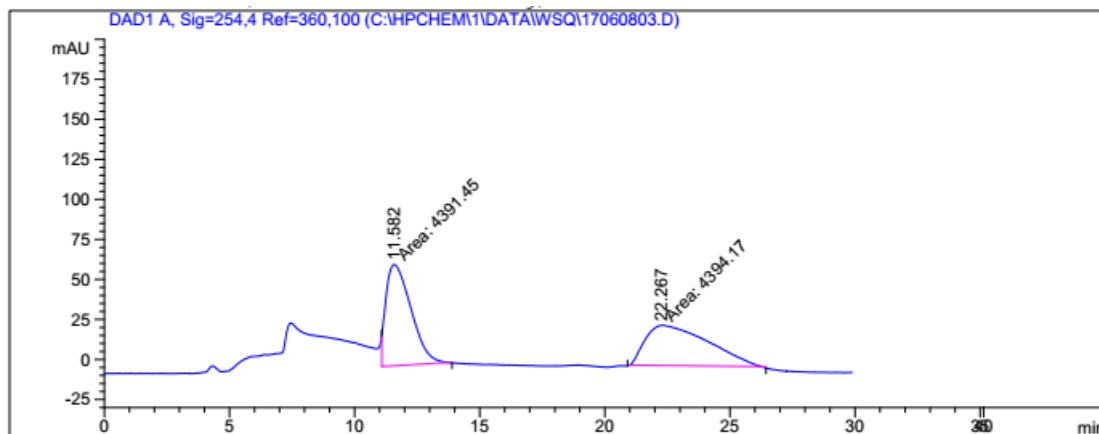

| Peak # | RetTime [min] | Type | Width [min] | Area [mAU*s] | Height [mAU] | Area %  |
|--------|---------------|------|-------------|--------------|--------------|---------|
| 1      | 11.582        | MM   | 1.2463      | 4736.61133   | 63.34438     | 49.9808 |
| 2      | 22.267        | MM   | 2.9861      | 4740.25195   | 26.45710     | 50.0192 |

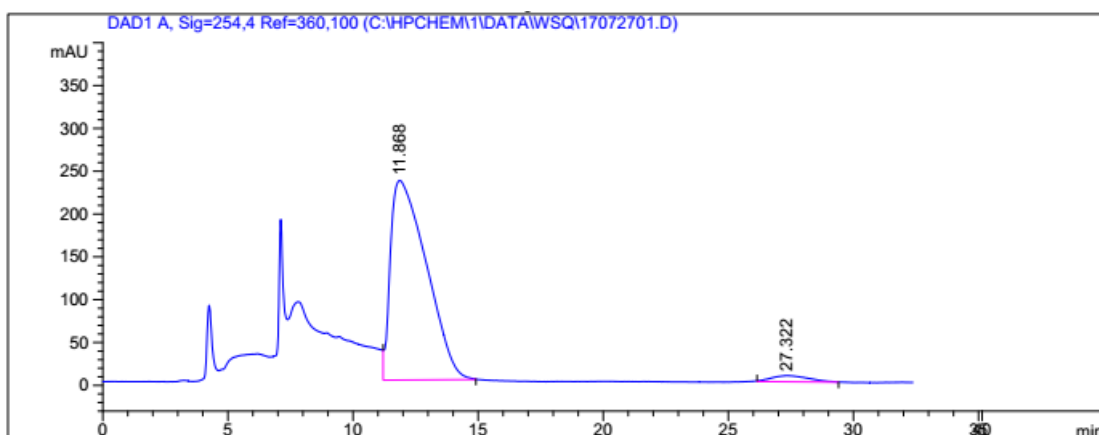

| Peak # | RetTime [min] | Type | Width [min] | Area [mAU*s] | Height [mAU] | Area %  |
|--------|---------------|------|-------------|--------------|--------------|---------|
| 1      | 11.868        | VB   | 1.1958      | 2.32366e4    | 232.94771    | 96.8530 |
| 2      | 27.322        | BV   | 1.2200      | 755.01422    | 7.24384      | 3.1470  |

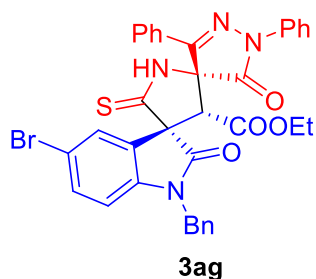

Prepared according to the general procedure within 15 min as white solid (108.5 mg, 79% yield) after silica gel chromatography (EtOAc/petroleum ether = 1/6).  $[\alpha]_D^{19}$  = 86.9 ( $c$  1.27,  $CH_2Cl_2$ ); Mp 154.1-155.9 °C;  $^1H$  NMR (400 MHz, Chloroform- $d$ )  $\delta$  9.06 (s, 1H), 8.04 (d,  $J$  = 8.0 Hz, 2H), 7.79 (d,  $J$  = 7.6 Hz, 2H), 7.67 (t,  $J$  = 7.4 Hz, 1H), 7.58 (t,  $J$  = 7.6 Hz, 2H), 7.42 (t,  $J$  = 7.8 Hz, 2H), 7.35 (d,  $J$  = 6.5 Hz, 2H), 7.30-7.22 (m, 4H), 7.19 (dd,  $J$  = 8.3, 1.8 Hz, 1H), 6.53 (d,  $J$  = 8.3 Hz, 1H), 5.38 (d,  $J$  = 1.9 Hz, 1H), 5.05 (s, 1H), 4.95 (d,  $J$  = 16.0 Hz, 1H), 4.80 (d,  $J$  = 16.0 Hz, 1H), 3.85-3.77 (m, 1H), 3.64-3.51 (m, 1H), 0.45 (t,  $J$  = 7.1 Hz, 3H);  $^{13}C$  NMR (101 MHz,

Chloroform-*d*)  $\delta$  174.2, 168.7, 164.7, 142.9, 137.5, 134.7, 132.3, 131.8, 130.6, 129.7, 129.6, 129.3, 129.1, 128.7, 127.8, 127.5, 126.9, 125.9, 119.1, 115.3, 111.1, 73.8, 67.9, 61.6, 58.1, 44.8, 13.1; HRMS (ESI)  $m/z$  Calcd. for  $C_{35}H_{28}BrN_4O_4S^+$  ( $[M+H]^+$ ) 679.1009, Found 679.1014; Enantiomeric excess was determined to be 99% (determined by HPLC using chiral AD-H column, hexane/2-propanol = 70/30,  $\lambda$  = 254 nm, 30 °C, 0.8 mL/min,  $t_{major}$  = 12.5 min,  $t_{minor}$  = 26.5 min)

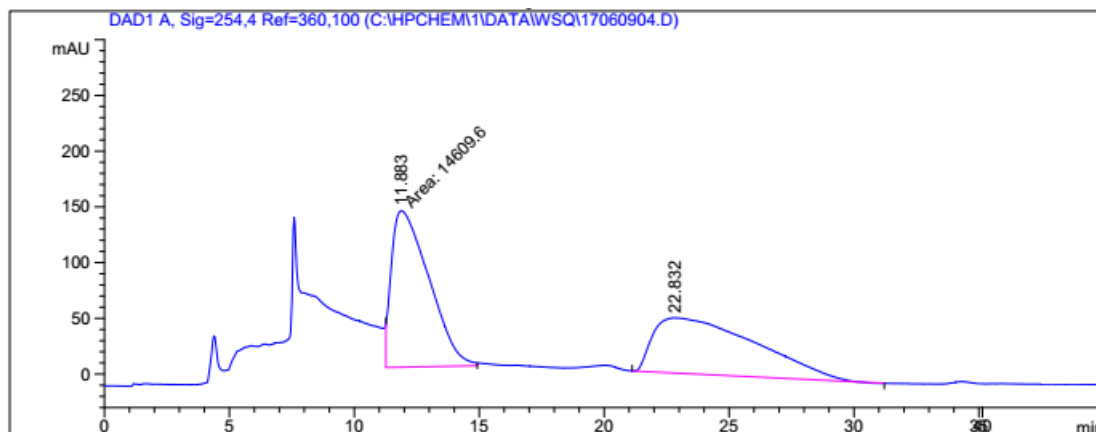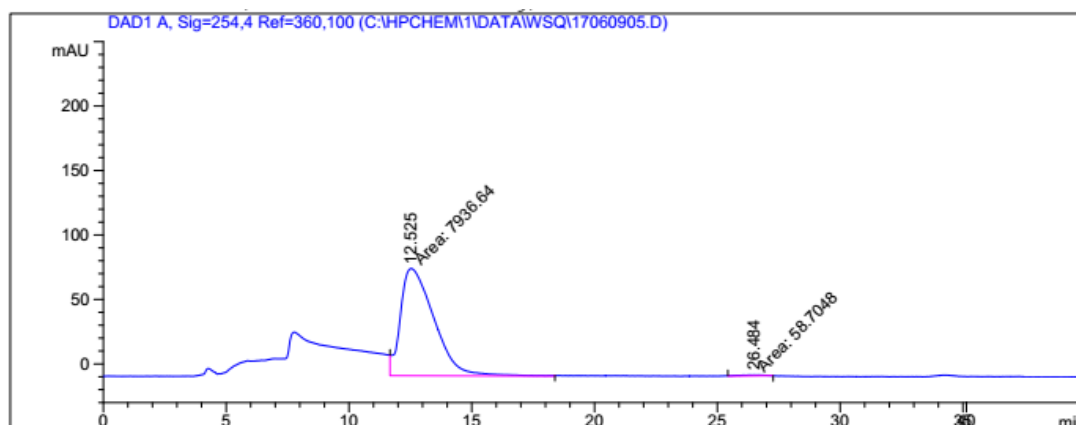

### Synthesis of compound d

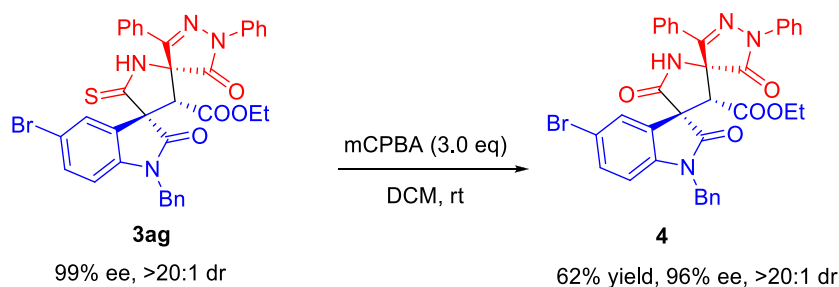

To a Schlenk tube equipped with a magnetic stir bar was charged with compound **3ag** (0.1mmol, 64.3 mg) and DCM (2mL) at 0 °C, mCPBA (0.3 mmol, 54 mg) was added in one portion, then the reaction was stirred at room temperature for 1 h as white solid (93.2 mg, 77% yield) after silica gel chromatography (EtOAc/petroleum ether = 1/3).  $[\alpha]_D^{19} = 60.9$  (c 0.32, CH<sub>2</sub>Cl<sub>2</sub>); Mp 140.1-142.7 °C; <sup>1</sup>H NMR (400 MHz, Chloroform-*d*) δ 8.00 (d, *J* = 7.5 Hz, 2H), 7.79-7.62 (m, 4H), 7.54 (t, *J* = 7.9 Hz, 2H), 7.42 (t, *J* = 7.9 Hz, 2H), 7.26-7.14 (m, 6H), 6.47 (d, *J* = 8.2 Hz, 1H), 5.32 (s, 1H), 5.02 (d, *J* = 15.8 Hz, 1H), 4.88 (s, 1H), 4.77 (d, *J* = 15.9 Hz, 1H), 3.86-3.80 (m, 1H), 3.60-3.56 (m, 1H), 0.44 (t, *J* = 6.9 Hz, 3H); <sup>13</sup>C NMR (101 MHz, Chloroform-*d*) δ 173.4, 171.3, 164.8, 158.4, 142.8, 137.6, 134.5, 133.5, 132.3, 131.8, 129.4, 129.3, 129.0, 128.7, 127.8, 127.2, 126.9, 125.8, 119.0, 111.0, 67.3, 61.6, 59.0, 55.4, 44.6, 13.1; HRMS (ESI) *m/z* Calcd. for C<sub>35</sub>H<sub>28</sub>BrN<sub>4</sub>O<sub>5</sub>S<sup>+</sup> ([M+H]<sup>+</sup>) 663.1251, Found 663.1238; Enantiomeric excess was determined to be 96% (determined by HPLC using chiral AD-H column, hexane/2-propanol = 70/30, λ = 254 nm, 30 °C, 0.8 mL/min, *t*<sub>major</sub> = 37.2 min, *t*<sub>minor</sub> = 68.7min)

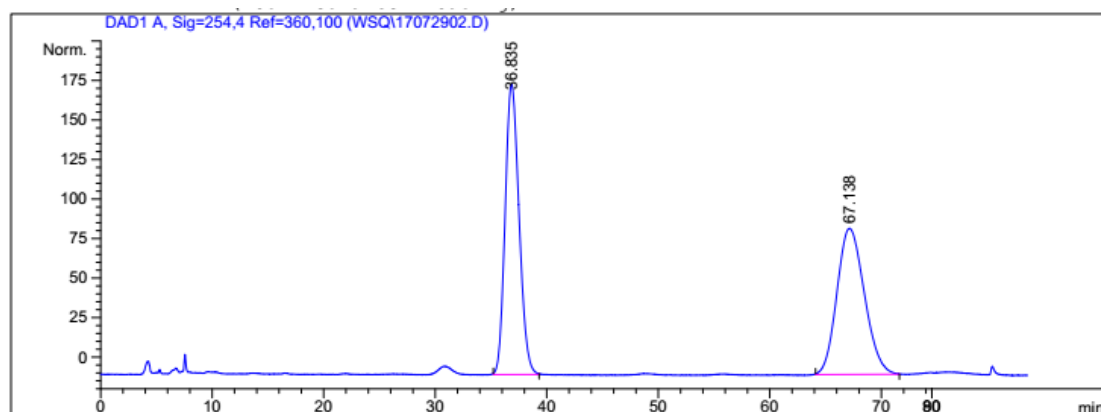

| Peak # | RetTime [min] | Type | Width [min] | Area [mAU*s] | Height [mAU] | Area %  |
|--------|---------------|------|-------------|--------------|--------------|---------|
| 1      | 36.835        | BB   | 1.3262      | 1.58980e4    | 183.59811    | 50.1103 |
| 2      | 67.138        | BB   | 2.2213      | 1.58280e4    | 92.45415     | 49.8897 |

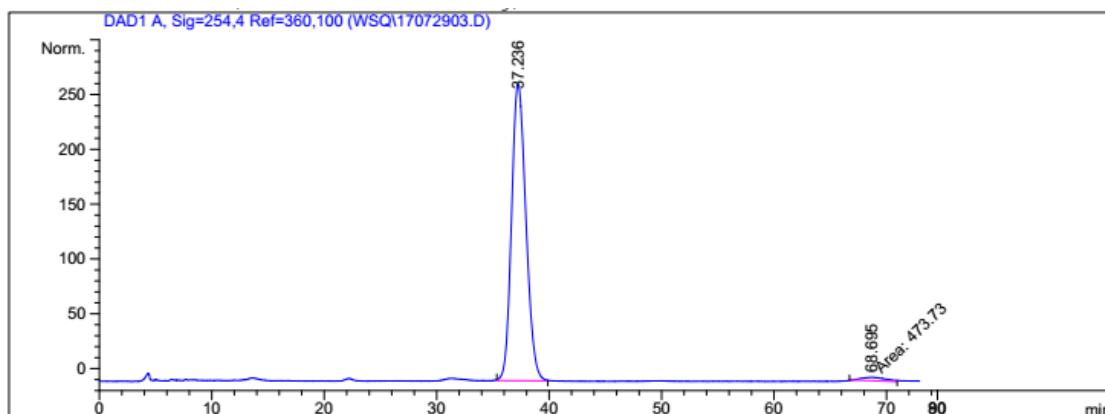

| Peak # | RetTime [min] | Type | Width [min] | Area [mAU*s] | Height [mAU] | Area %  |
|--------|---------------|------|-------------|--------------|--------------|---------|
| 1      | 37.236        | BB   | 1.3729      | 2.40418e4    | 270.50290    | 98.0676 |
| 2      | 68.695        | MM   | 2.4755      | 473.72968    | 3.18944      | 1.9324  |

## Synthesis of compound 5

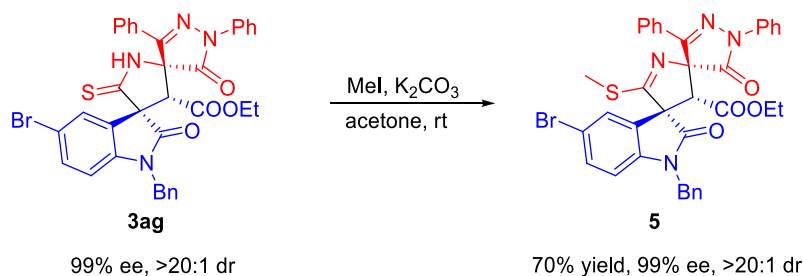

To a Schlenk tube equipped with a magnetic stir bar was charged with compound **3ag** (0.2 mmol, 136.6 mg) and K<sub>2</sub>CO<sub>3</sub> (0.44 mmol, 60.7 mg), followed with acetone (5 mL) at 0 °C. MeI (0.44 mmol, 62.5 mg) was dropwise added into reaction mixture. Then the reaction was stirred at room temperature overnight as white solid (96.9 mg, 70% yield) after silica gel chromatography (EtOAc/petroleum ether = 1/3). [ $\alpha$ ]<sub>D</sub><sup>19</sup> = 36.1 (*c* 0.13, CH<sub>2</sub>Cl<sub>2</sub>); Mp 266.0-270.4 °C; <sup>1</sup>H NMR (400 MHz, Chloroform-*d*)  $\delta$  8.17 (d, *J* = 8.0 Hz 2H), 7.89-7.82 (m, 2H), 7.66-7.57 (m, 3H), 7.48-7.44 (m, 4H), 7.40-7.29 (m, 4H), 7.24 (d, *J* = 7.4 Hz, 1H), 7.15 (d, *J* = 1.9 Hz, 1H), 6.60 (d, *J* = 8.4 Hz, 1H), 5.20 (d, *J* = 15.7 Hz, 1H), 4.78 (d, *J* = 15.7 Hz, 1H), 4.12 (s, 1H), 4.06-3.87 (m, 2H), 2.57 (s, 3H), 0.93 (t, *J* = 7.1 Hz, 3H); <sup>13</sup>C NMR (101 MHz, Chloroform-*d*)  $\delta$  170.2, 168.5, 166.2, 138.3, 135.2, 132.7, 131.1, 130.0, 129.2, 128.8, 128.8, 127.8, 127.6, 127.4, 126.5, 125.0, 118.6, 115.2, 111.1, 84.5, 68.2, 62.2, 60.9, 44.6, 14.3, 13.6; HRMS (ESI) *m/z* Calcd. for C<sub>36</sub>H<sub>30</sub>BrN<sub>4</sub>O<sub>4</sub>S<sup>+</sup> ([M+H]<sup>+</sup>) 693.1166, Found 693.1160; Enantiomeric excess was determined to be 99% (determined by HPLC using chiral AD-H column, hexane/2-propanol = 70/30,  $\lambda$  = 254 nm, 25 °C, 0.8 mL/min, *t*<sub>major</sub> = 7.8 min, *t*<sub>minor</sub> = 12.0 min)

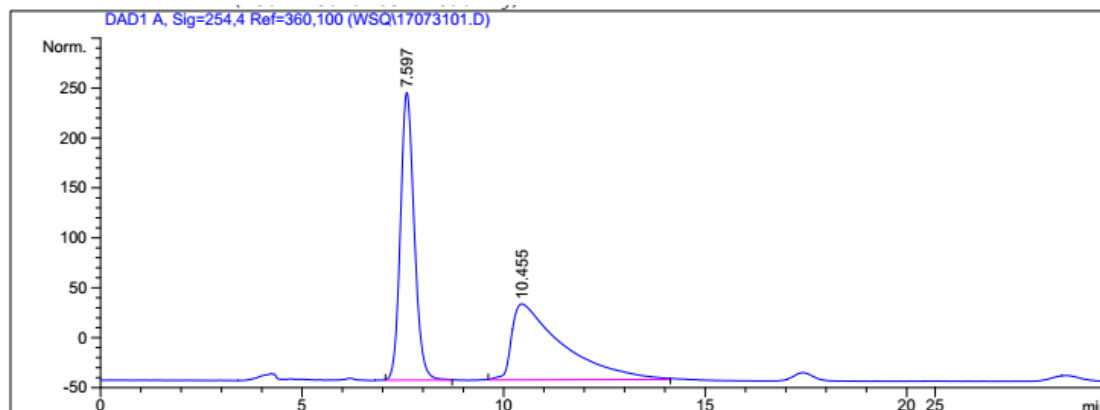

| Peak # | RetTime [min] | Type | Width [min] | Area [mAU*s] | Height [mAU] | Area %  |
|--------|---------------|------|-------------|--------------|--------------|---------|
| 1      | 7.597         | BB   | 0.3658      | 6859.83301   | 288.04718    | 50.7320 |
| 2      | 10.455        | BB   | 1.1656      | 6661.86523   | 76.08209     | 49.2680 |

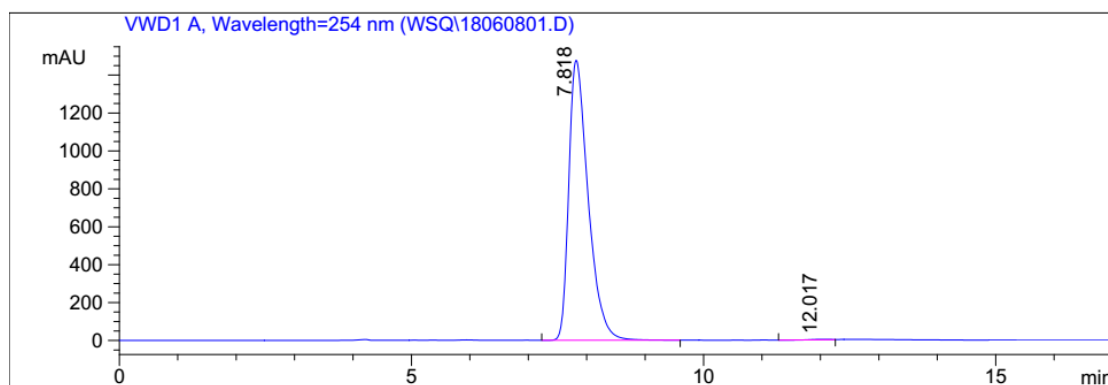

| Peak # | RT [min] | Type | Width [min] | Area      | Area % |
|--------|----------|------|-------------|-----------|--------|
| 1      | 7.818    | VB   | 0.349       | 33998.891 | 99.840 |
| 2      | 12.017   | VV   | 0.349       | 54.639    | 0.160  |

### Synthesis of compound 6

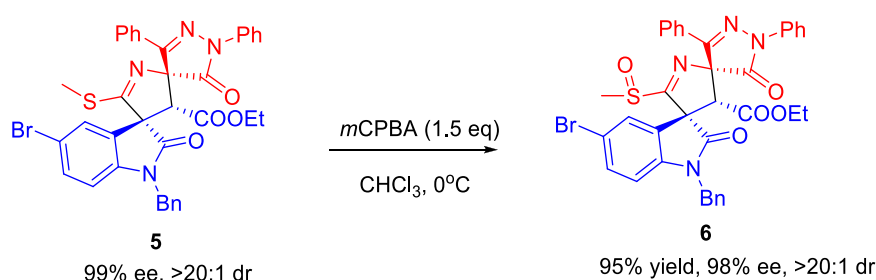

To a Schlenk tube equipped with a magnetic stir bar was charged with compound **5** (0.05 mmol, 34.6 mg) and chloroform (1 mL) at 0 °C, mCPBA (0.05 mmol, 8.6 mg) was added in one portion. Then the reaction was stirred at room temperature for 1 h as white solid (33.7 mg, 95% yield) after silica gel chromatography (EtOAc/petroleum ether = 1/3).  $[\alpha]_D^{19} = 199.1$  (*c* 0.22, CH<sub>2</sub>Cl<sub>2</sub>); <sup>1</sup>H NMR (400 MHz, Chloroform-*d*) δ 8.11 (d, *J* = 7.7 Hz, 2H), 7.77-7.81 (m, 2H), 7.66 (q, *J* = 3.6 Hz, 3H), 7.51-7.42 (m, 4H), 7.41-7.31 (m, 3H), 7.31-7.24 (m, 2H), 7.19 (d, *J* = 1.9 Hz, 1H), 6.63 (d, *J* = 8.3 Hz, 1H), 5.04 (d, *J* = 16.0 Hz, 1H), 4.96 (d, *J* = 16.0 Hz, 1H), 4.13 (s, 1H), 4.08-3.90 (m, 2H), 2.93 (s, 3H), 1.29 (s, 1H), 0.94 (t, *J* = 7.2 Hz, 3H); <sup>13</sup>C NMR (101 MHz, Chloroform-*d*) δ 169.0, 165.4, 155.2, 142.8, 137.8, 134.9, 133.2, 131.5, 130.1, 129.7, 129.4, 129.1, 128.9, 128.8, 127.9, 127.7, 127.5, 126.4, 125.5, 118.7, 115.3, 111.4, 85.0, 67.1, 62.6, 61.1, 45.1, 40.5, 13.6; HRMS (ESI) *m/z* Calcd. for C<sub>36</sub>H<sub>30</sub>BrN<sub>4</sub>O<sub>5</sub>S<sup>+</sup> ([M+H]<sup>+</sup>) 709.1115, Found 709.1132; Enantiomeric excess was determined to be 98% (determined by HPLC using chiral AD-H column, hexane/2-propanol = 70/30, λ = 254 nm, 25 °C, 0.7 mL/min, *t*<sub>major</sub> = 28.8min, *t*<sub>minor</sub> = 33.5min).

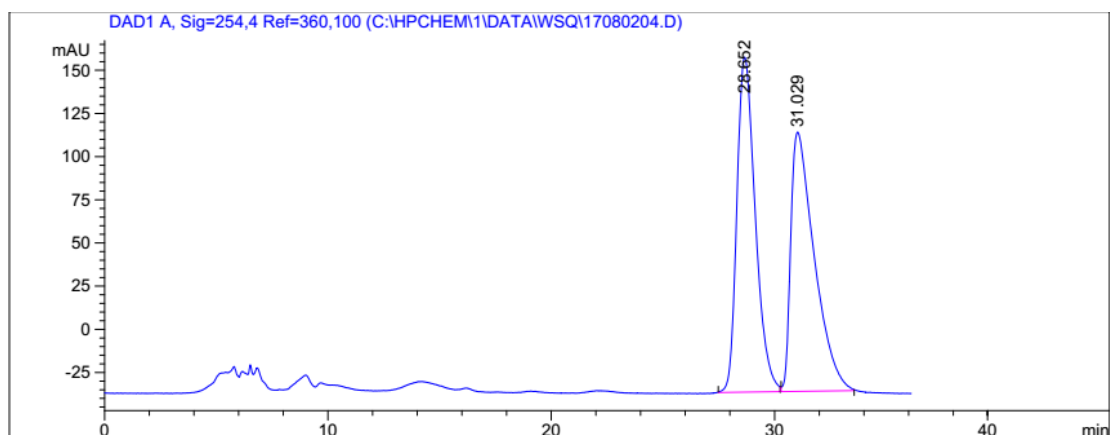

| Peak # | RetTime [min] | Type | Width [min] | Area [mAU*s] | Height [mAU] | Area %  |
|--------|---------------|------|-------------|--------------|--------------|---------|
| 1      | 28.652        | BB   | 0.8057      | 1.11326e4    | 193.93939    | 50.3354 |
| 2      | 31.029        | BB   | 0.9891      | 1.09842e4    | 150.21072    | 49.6646 |

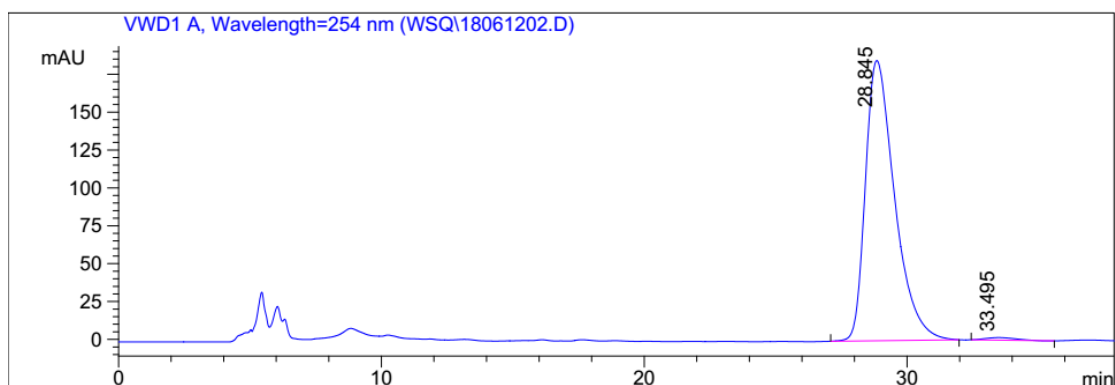

| Peak # | RT [min] | Type | Width [min] | Area      | Area % |
|--------|----------|------|-------------|-----------|--------|
| 1      | 28.845   | BB   | 1.175       | 14314.832 | 99.071 |
| 2      | 33.495   | BP   | 0.932       | 134.175   | 0.929  |

### Synthesis of compound 7

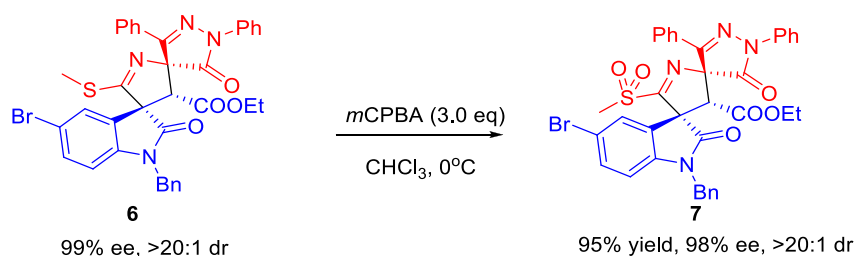

To a Schlenk tube equipped with a magnetic stir bar was charged with compound **6** (0.05 mmol, 34.6 mg) and chloroform (1 mL) at 0 °C, *m*CPBA (0.1 mmol, 17.2 mg) was added in one portion. Then the reaction was stirred at room temperature for 1 h as white solid (33.7 mg, 95% yield) after silica gel chromatography (EtOAc/petroleum ether = 1/3).  $[\alpha]_D^{19} = 108.5$  (c 0.54,

CH<sub>2</sub>Cl<sub>2</sub>); <sup>1</sup>H NMR (400 MHz, Chloroform-d) δ 8.11 – 8.06 (m, 2H), 7.76 (dd, *J* = 6.7, 2.9 Hz, 2H), 7.66 – 7.63 (m, 2H), 7.51 – 7.40 (m, 5H), 7.26 (s, 5H), 7.18 (d, *J* = 1.9 Hz, 1H), 6.54 (d, *J* = 8.4 Hz, 1H), 5.03 (d, *J* = 16.0 Hz, 1H), 4.94 (d, *J* = 16.0 Hz, 1H), 4.09 (s, 1H), 4.06-3.98(m, 1H), 3.95-3.87 (m, 1H), 3.28 (s, 3H), 1.26 (s, 1H), 0.91 (t, *J* = 7.2 Hz, 3H); <sup>13</sup>C NMR (101 MHz, Chloroform-d) δ 169.0, 165.4, 155.2, 142.8, 137.78, 134.9, 133.2, 131.5, 130.1, 129.78, 129.4, 129.1, 128.9, 128.9, 127.9, 127.7, 127.5, 126.4, 125.5, 118.7, 115.3, 111.4, 85.1, 67.10, 62.7, 61.1, 45.2, 40.5, 13.6. Enantiomeric excess was determined to be 98% (determined by HPLC using chiral AD-H column, hexane/2-propanol = 70/30, λ = 254 nm, 25 °C, 0.6 mL/min, *t*<sub>major</sub> = 16.0min, *t*<sub>minor</sub> = 22.5min.

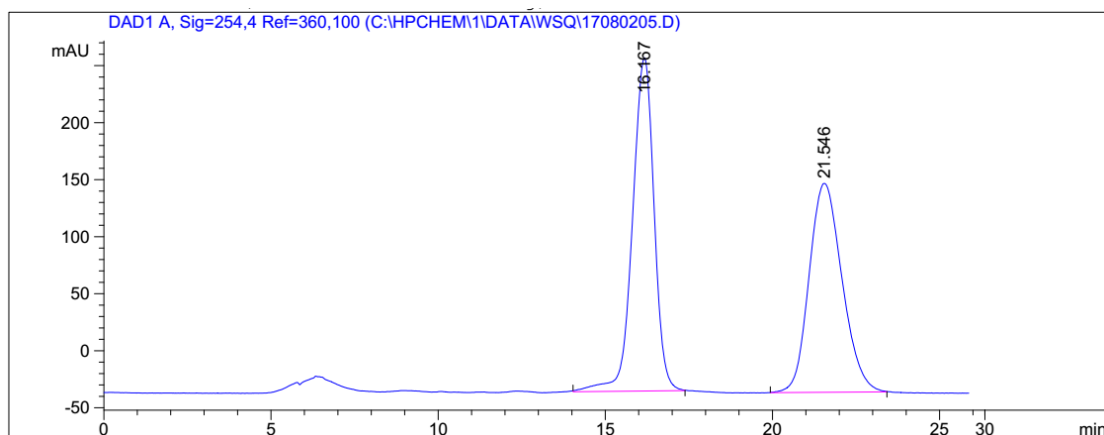

| Peak # | RetTime [min] | Type | Width [min] | Area [mAU*s] | Height [mAU] | Area %  |
|--------|---------------|------|-------------|--------------|--------------|---------|
| 1      | 16.167        | BB   | 0.6569      | 1.31524e4    | 292.31348    | 51.1929 |
| 2      | 21.546        | BB   | 0.9010      | 1.25395e4    | 183.09987    | 48.8071 |

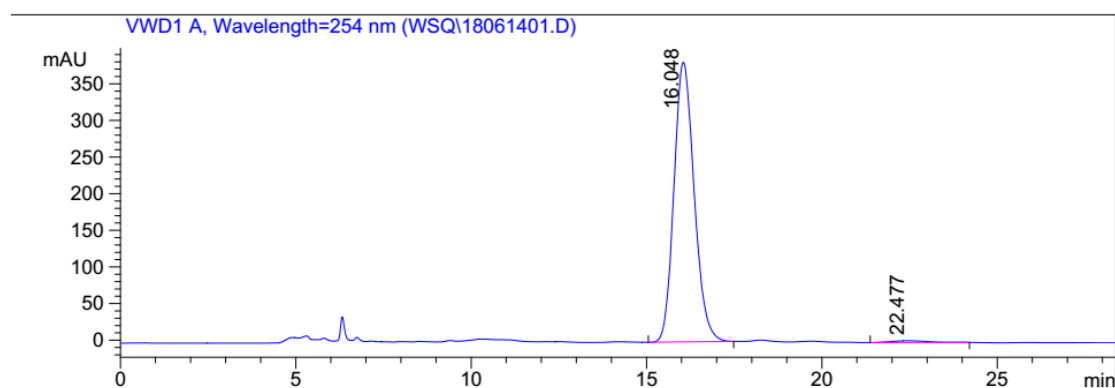

| Peak # | RT [min] | Type | Width [min] | Area      | Area % |
|--------|----------|------|-------------|-----------|--------|
| 1      | 16.048   | VB   | 0.623       | 15305.246 | 98.893 |
| 2      | 22.477   | BB   | 0.853       | 171.303   | 1.107  |

### Gram scale synthesis of compound 3ag

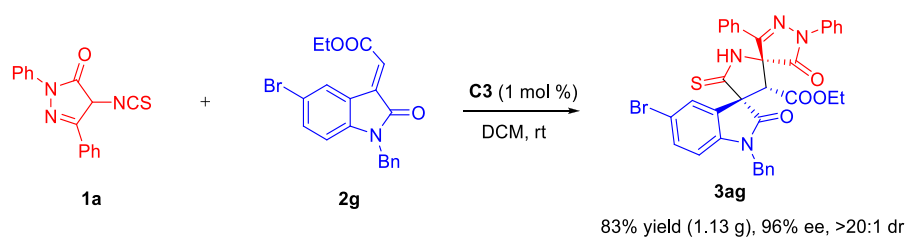

To a Schlenk tube equipped with a magnetic stir bar was charged with compound **1a** (2 mmol, 594 mg) and **C3** (1% mmol, 6.3 mg), followed with DCM (10 ml). Compound **2g** (2.4 mmol, 926 mg) was added in one portion. The reaction was checked by TLC. When the compound **1a** was consumed up, the reaction was stopped and purified by column chromatography on silica gel directly to give the product **3ag**

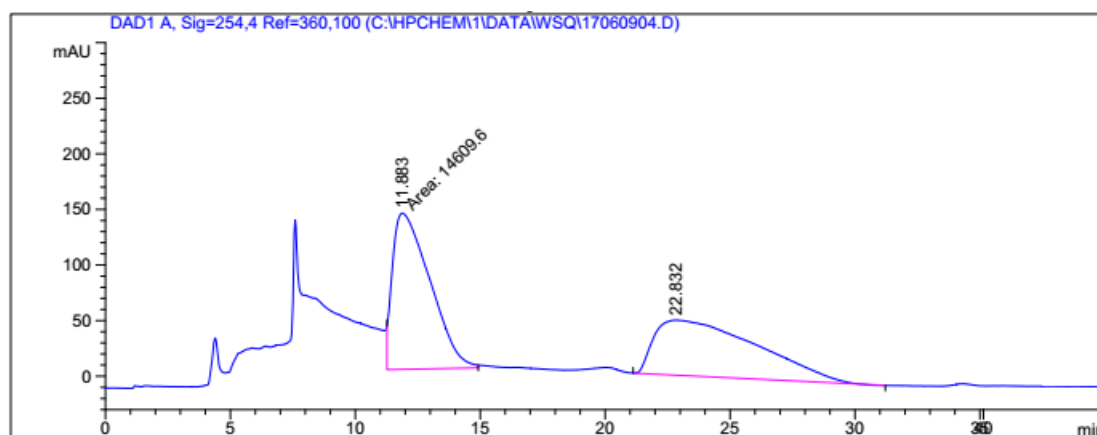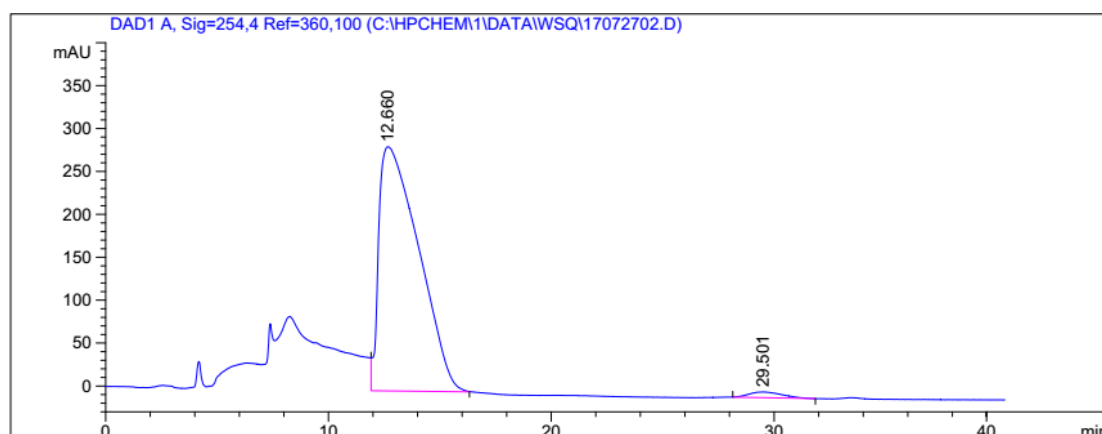

## References

1. X. Bao, S. Wei, X. Qian, J. Qu, B. Wang, L. Zou, G. Ge, *Org. Lett.*, 2018, **20**, 3394–3398.
2. X. Zhu, S. Chiba, *Chem. Commun.*, 2016, **52**, 2473–2476.

## NMR spectra for compounds

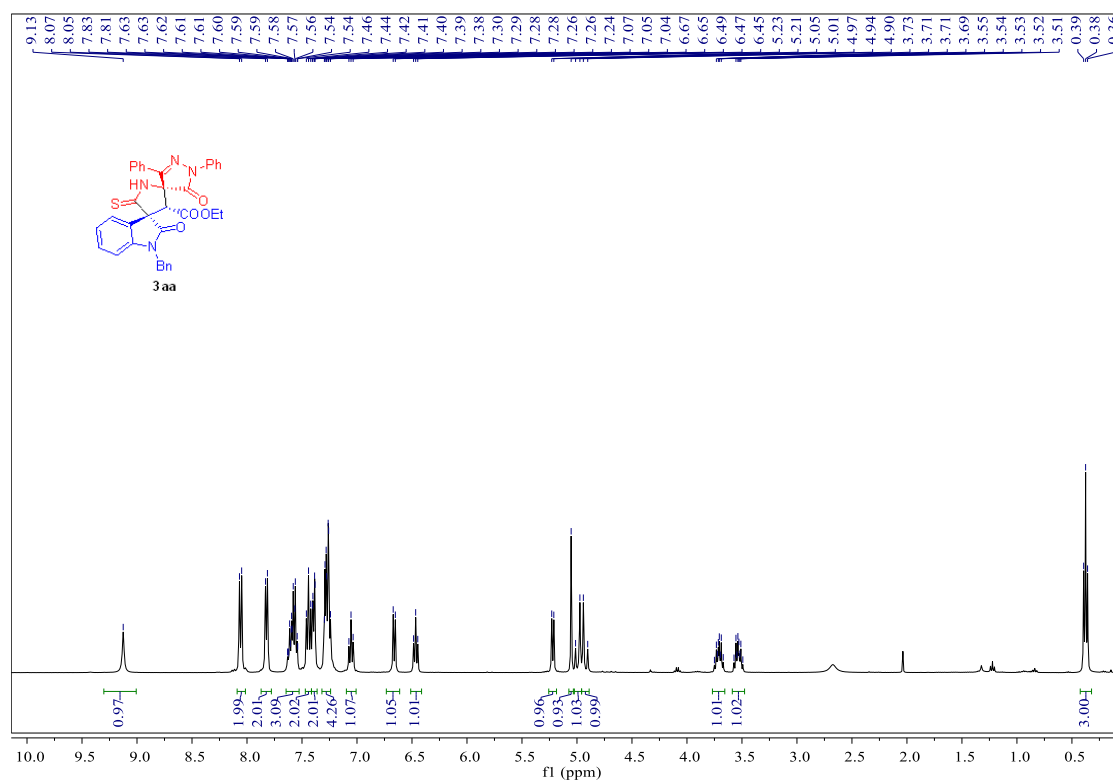

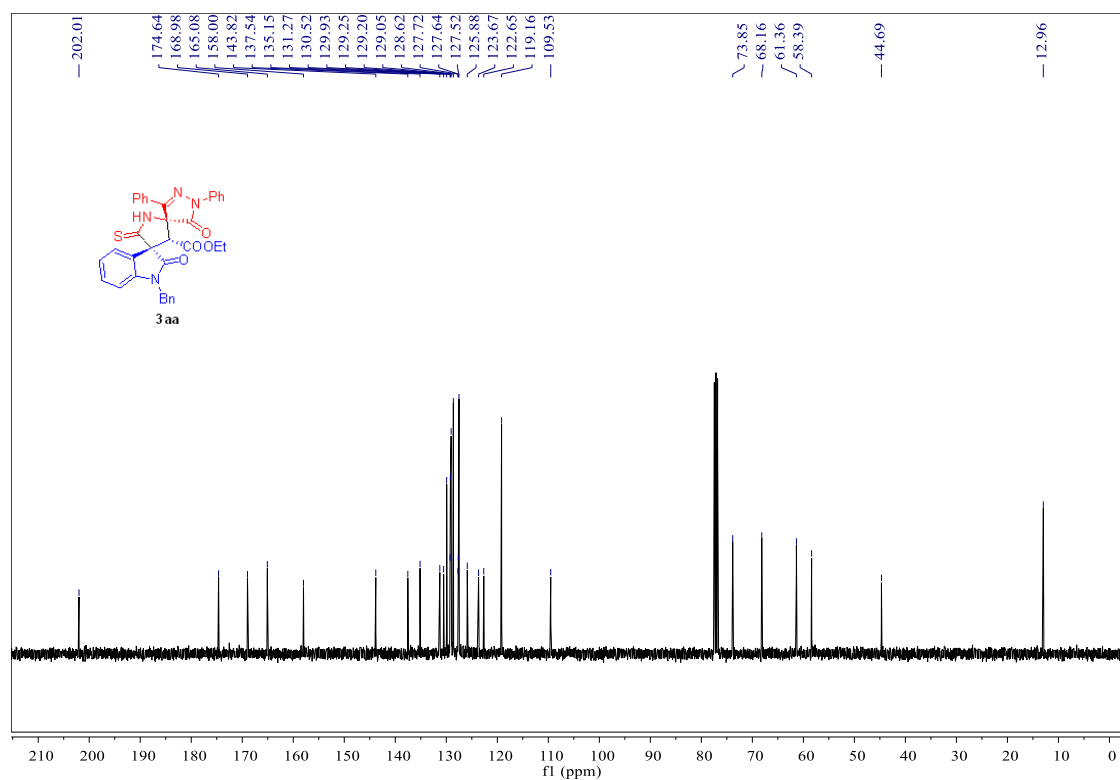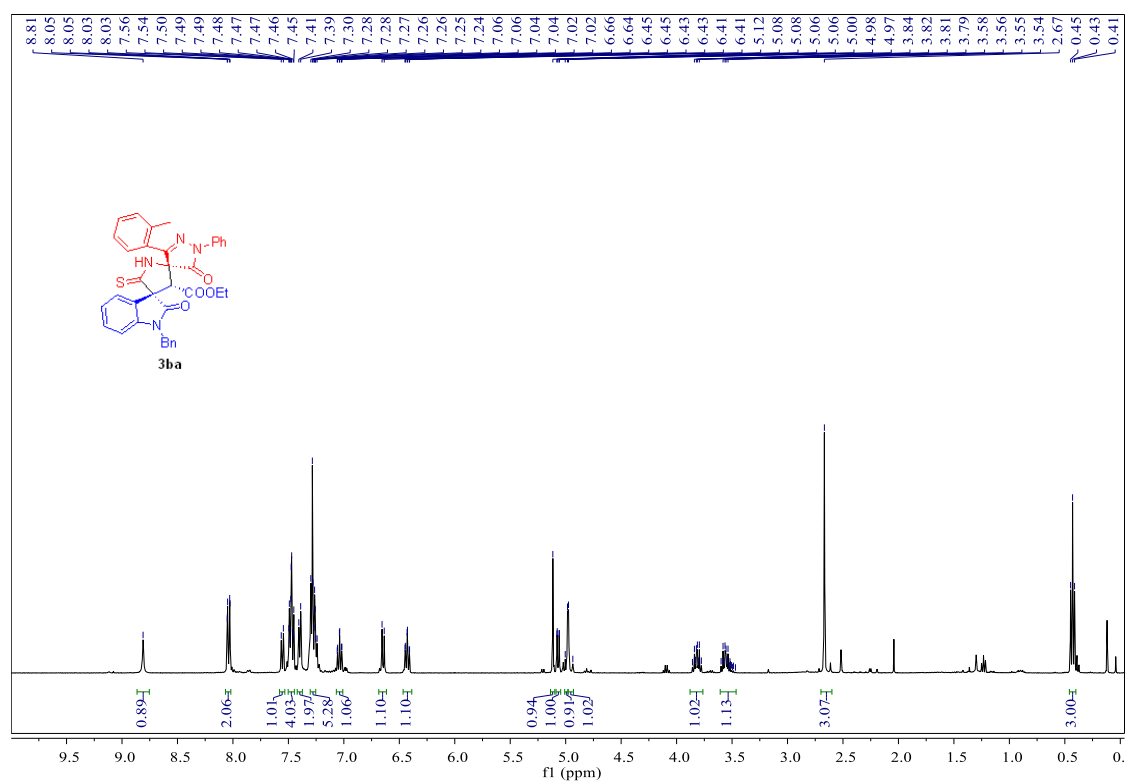

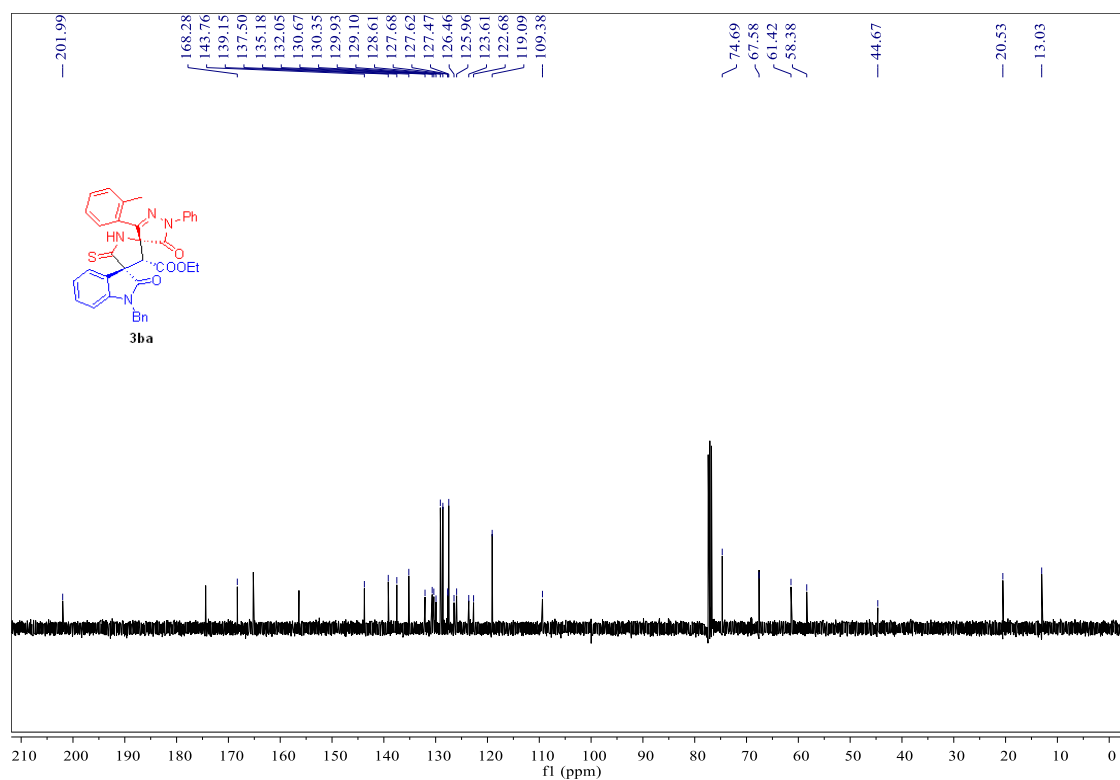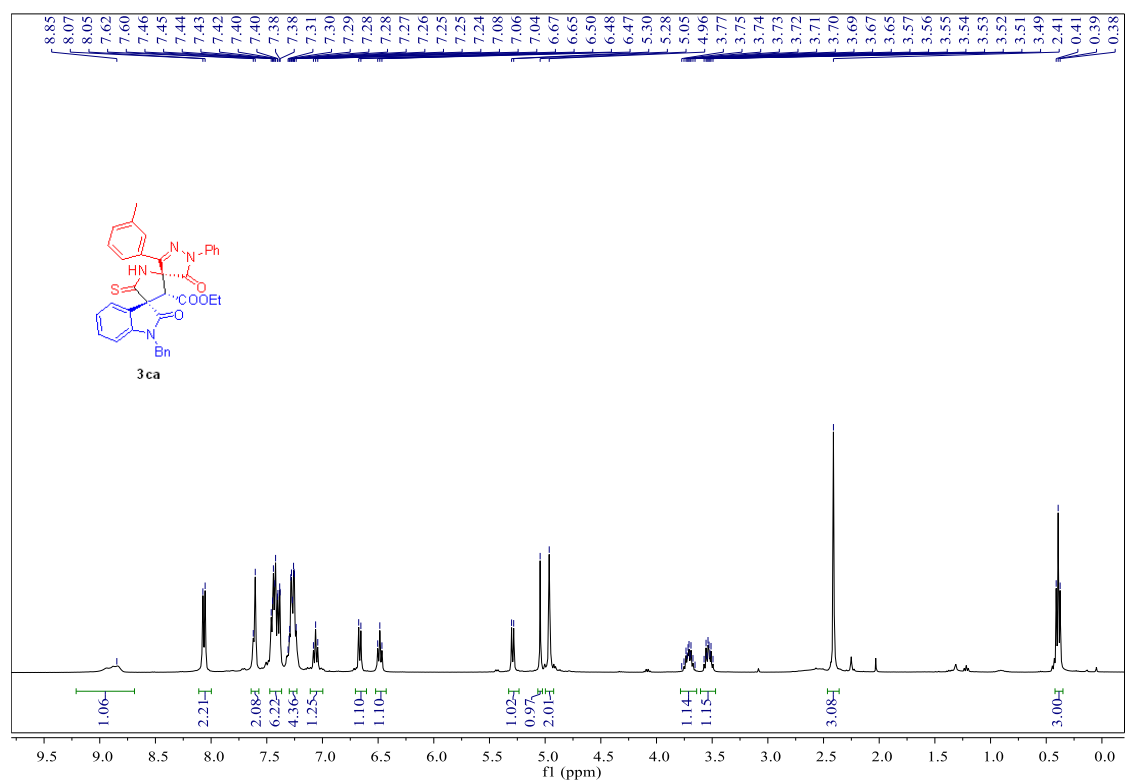

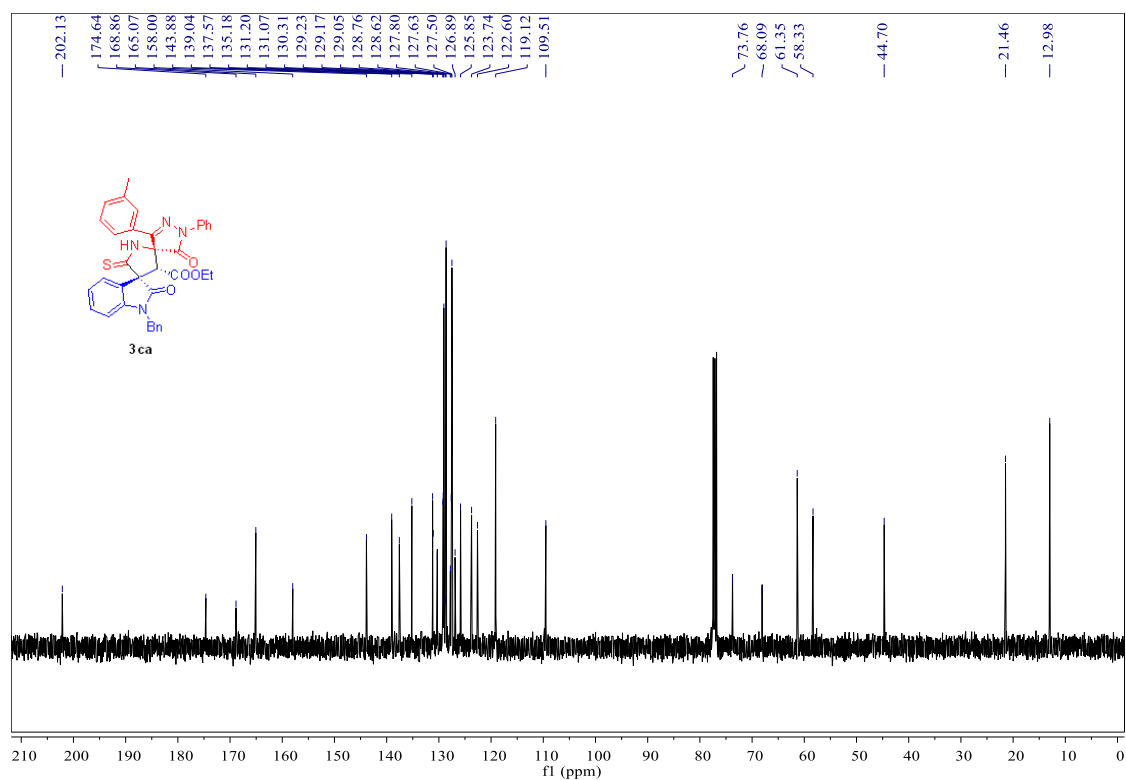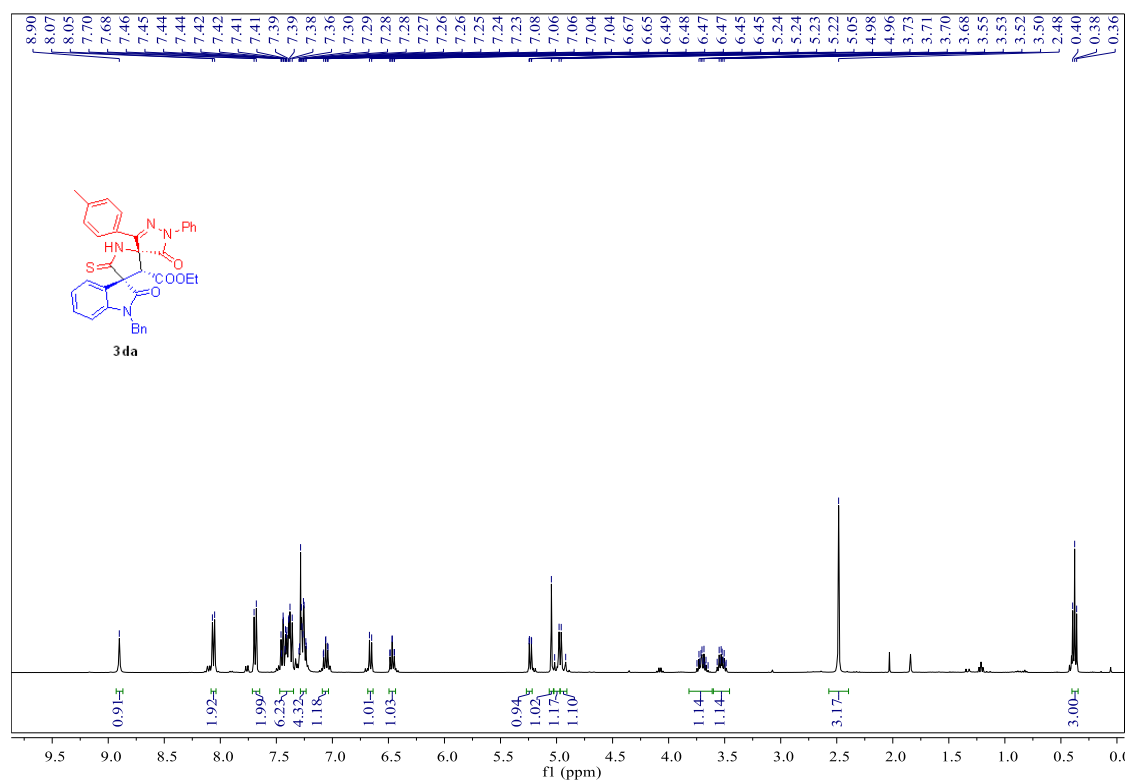

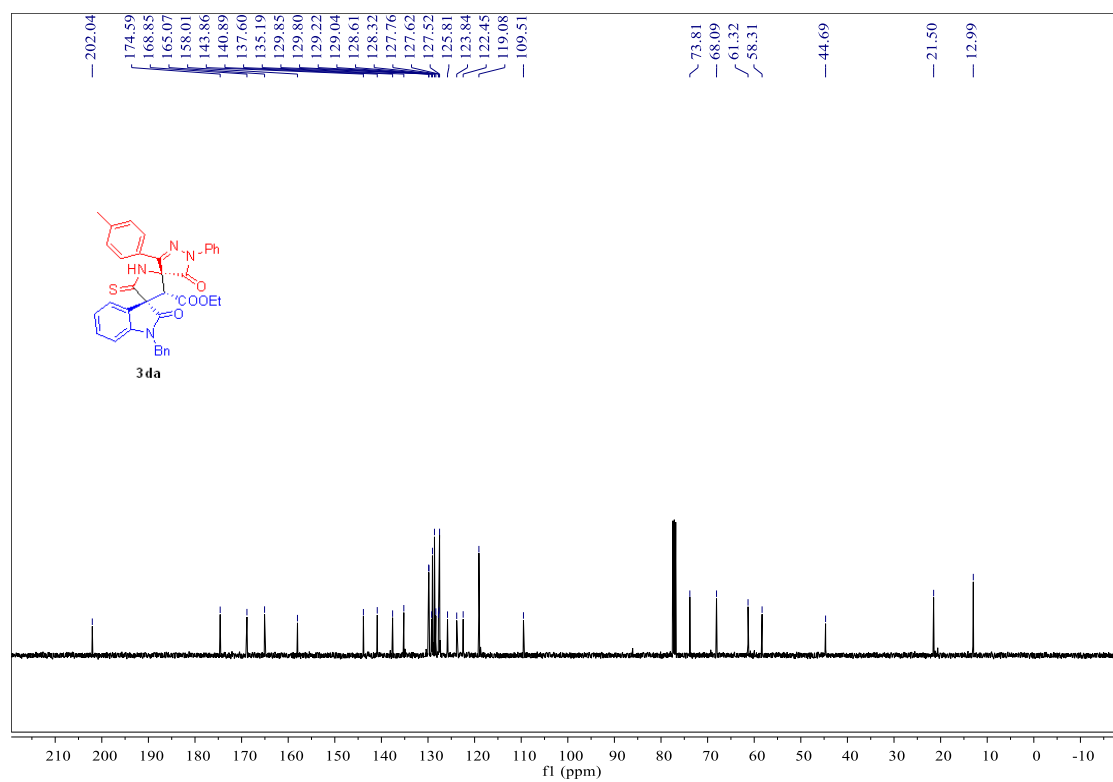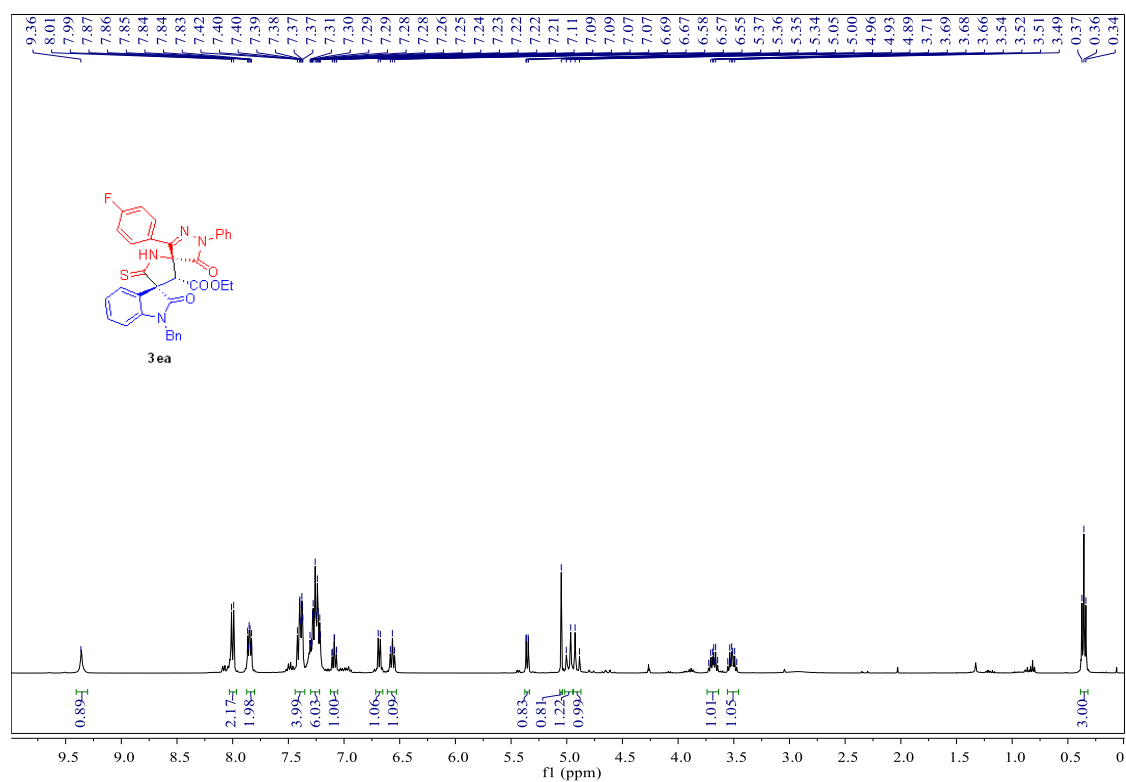

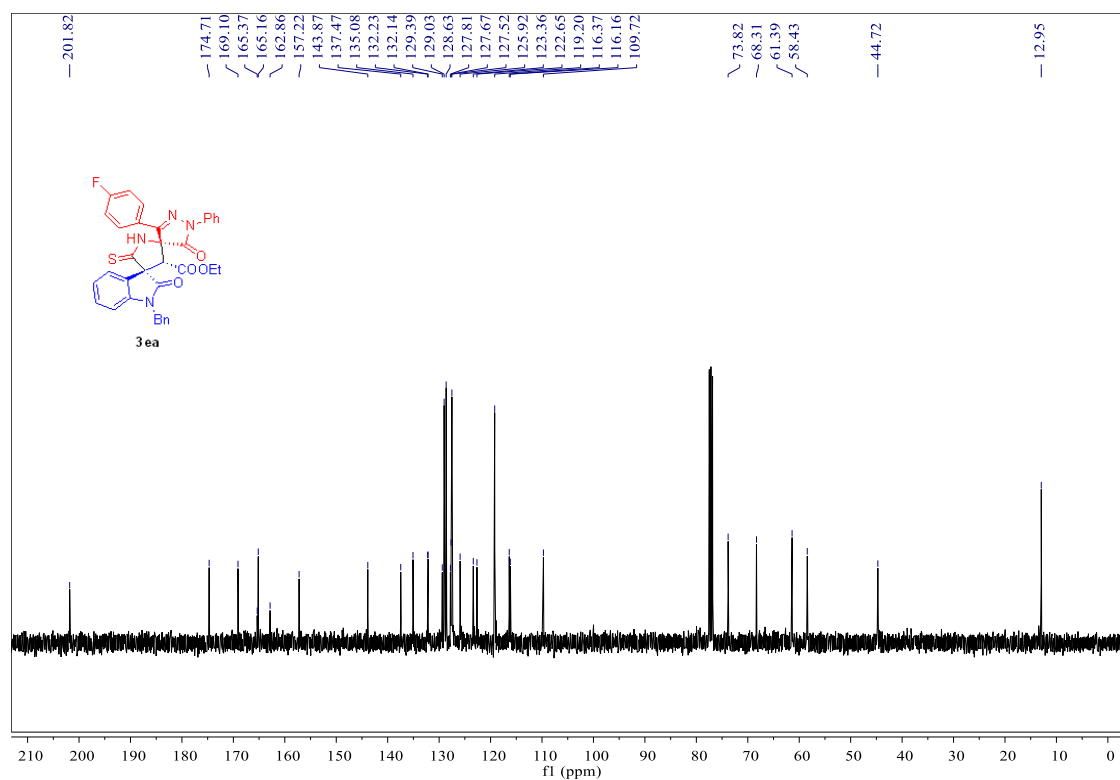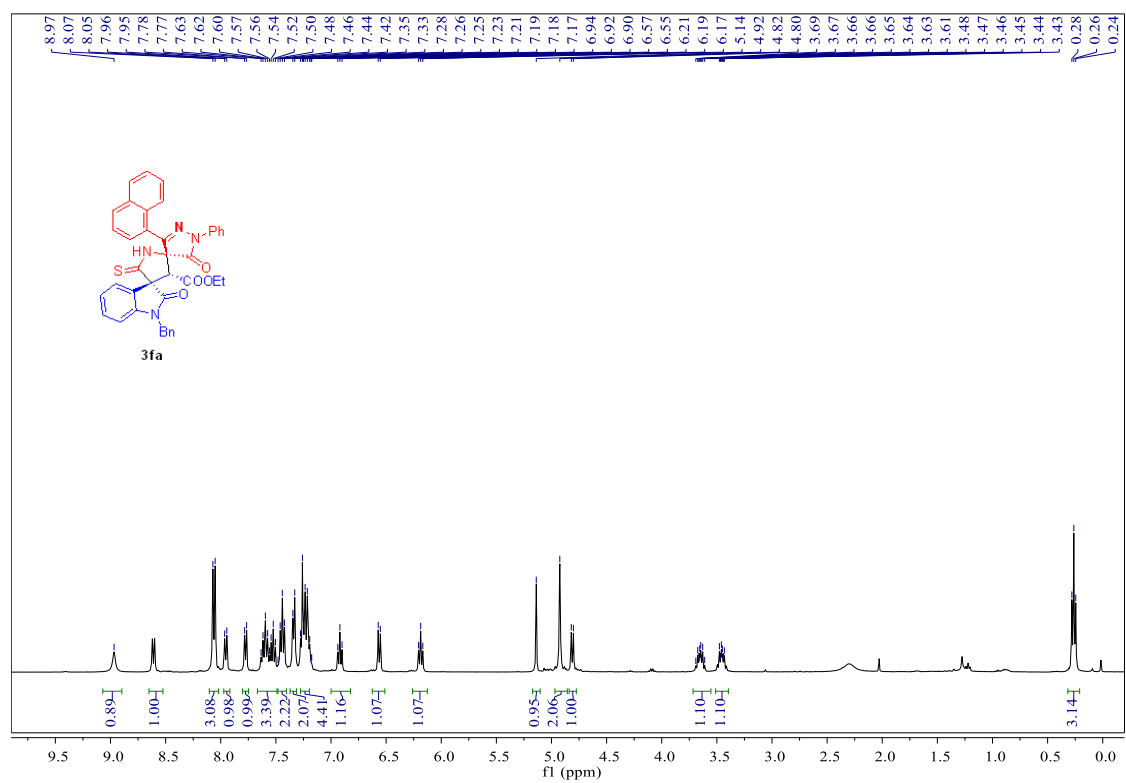

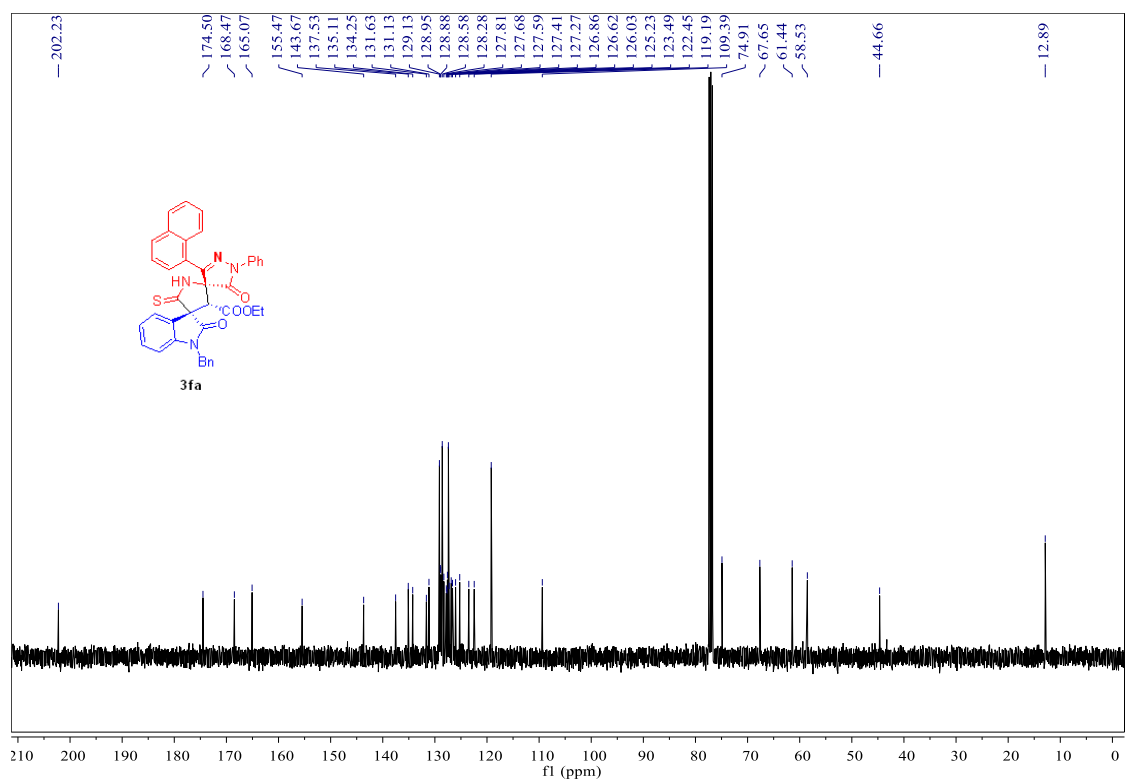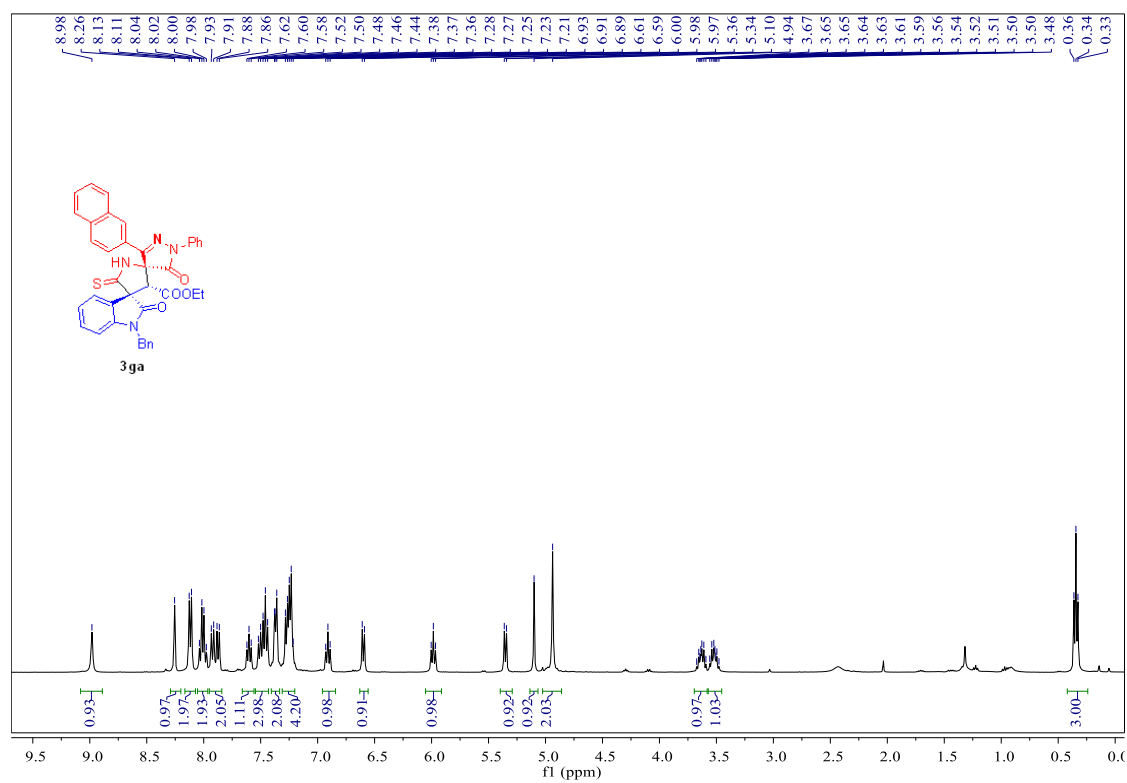

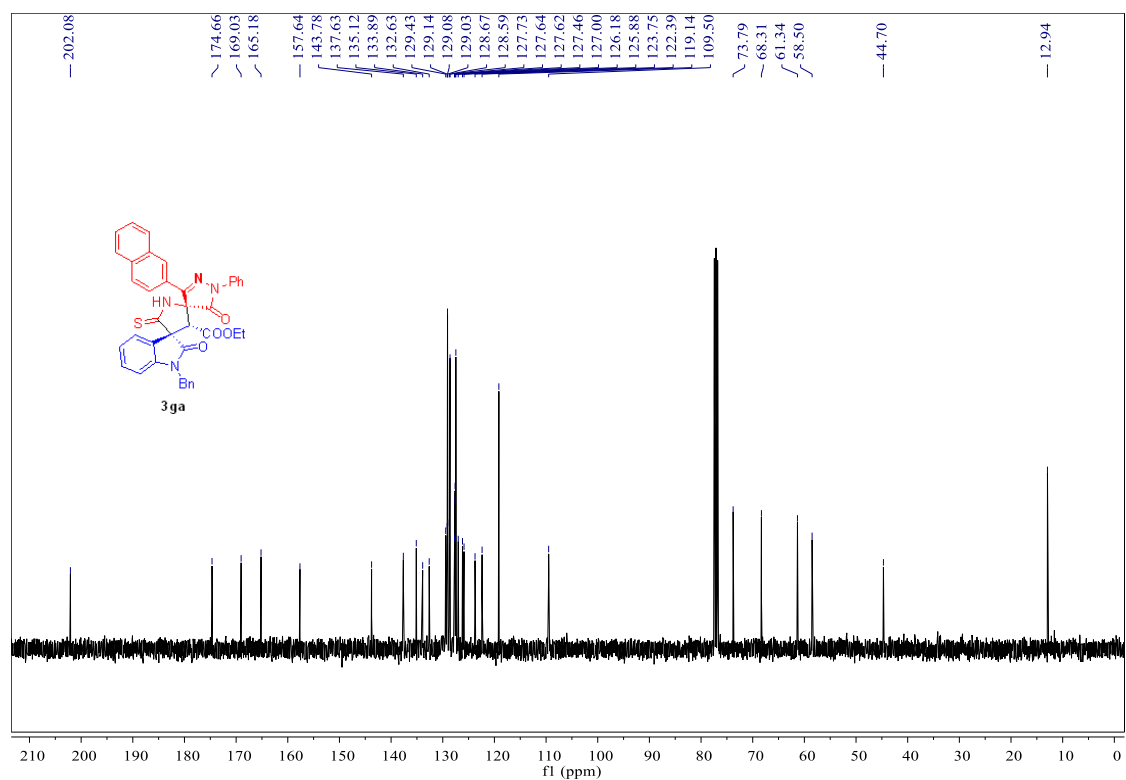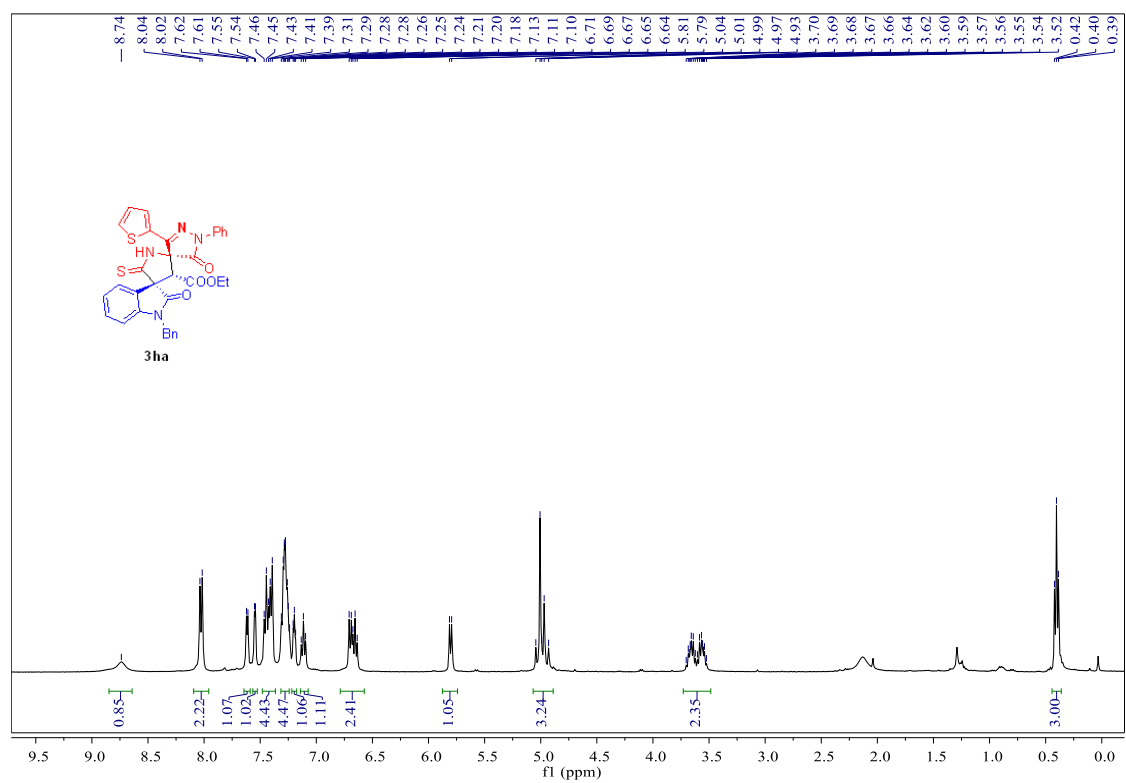

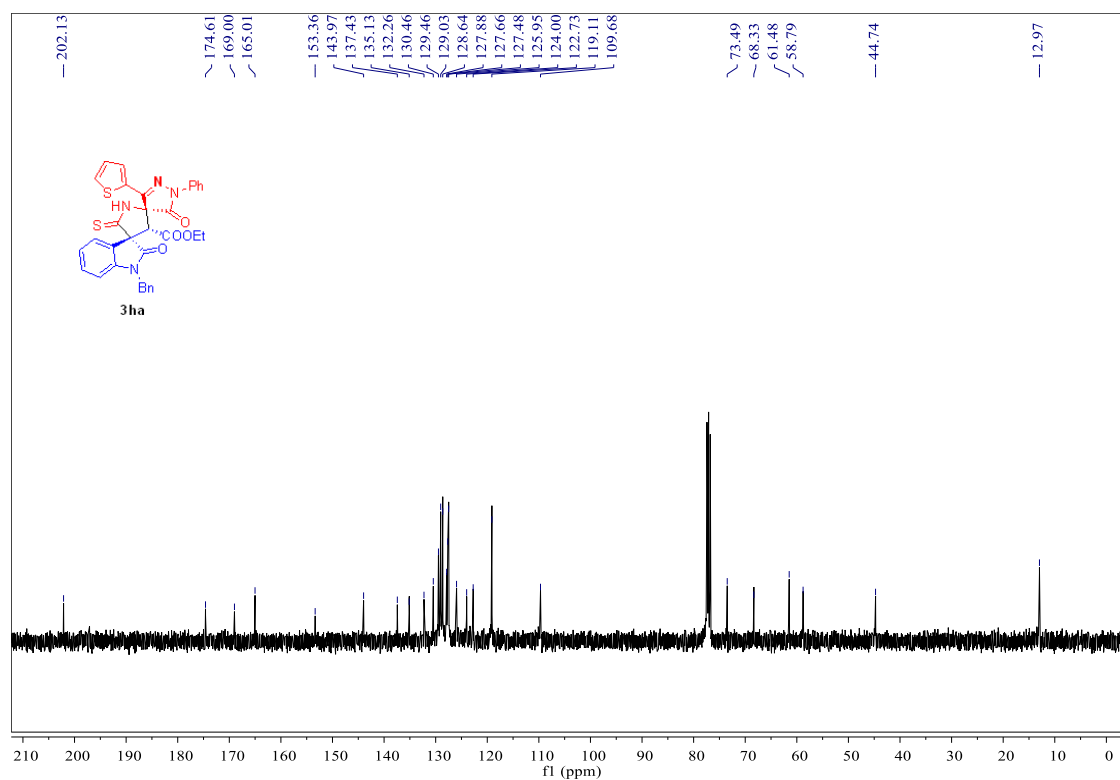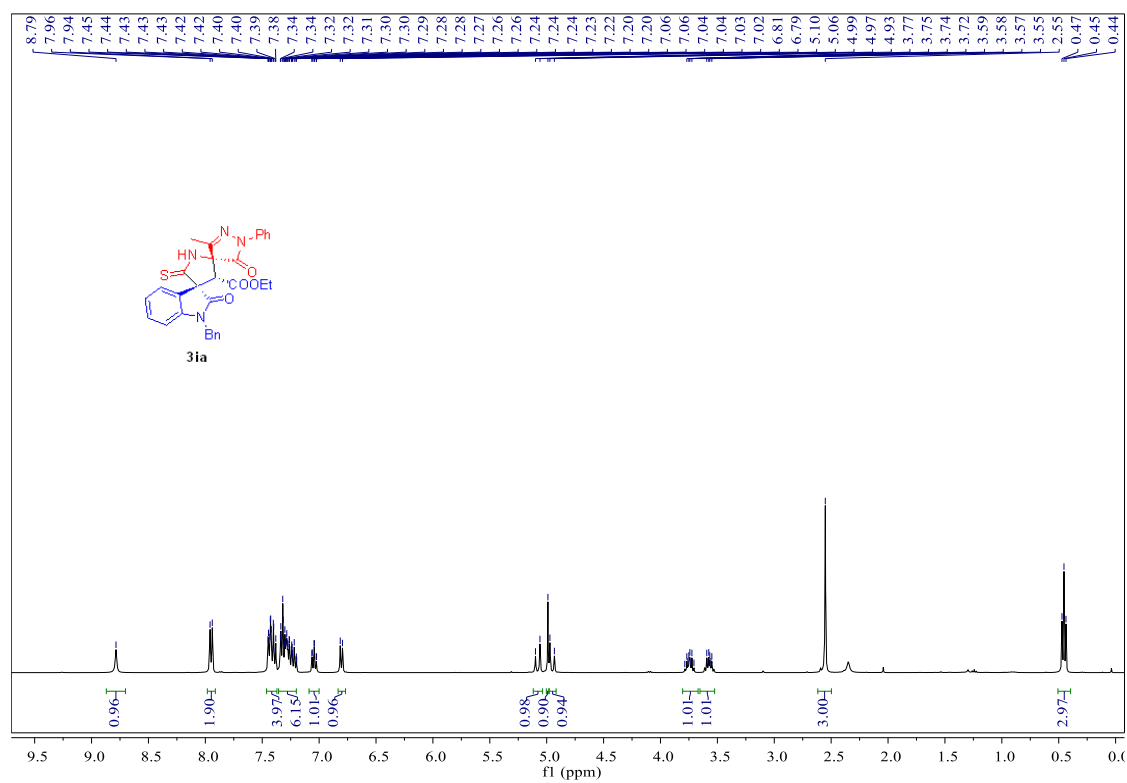

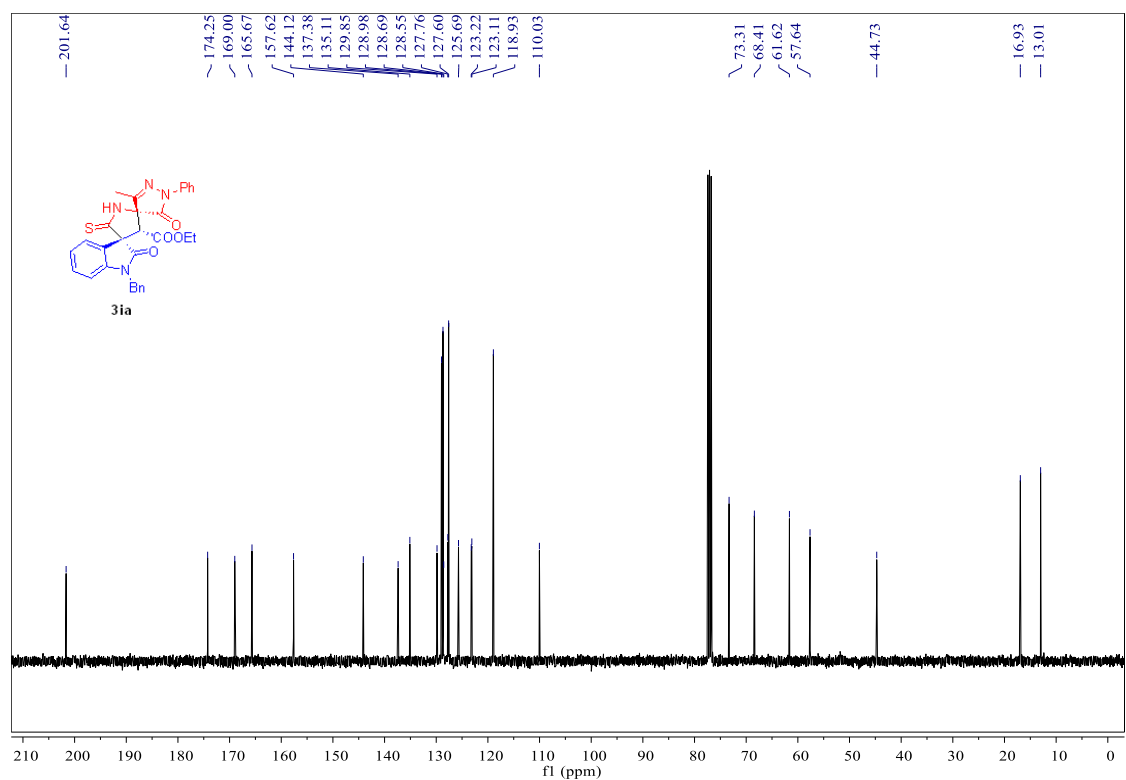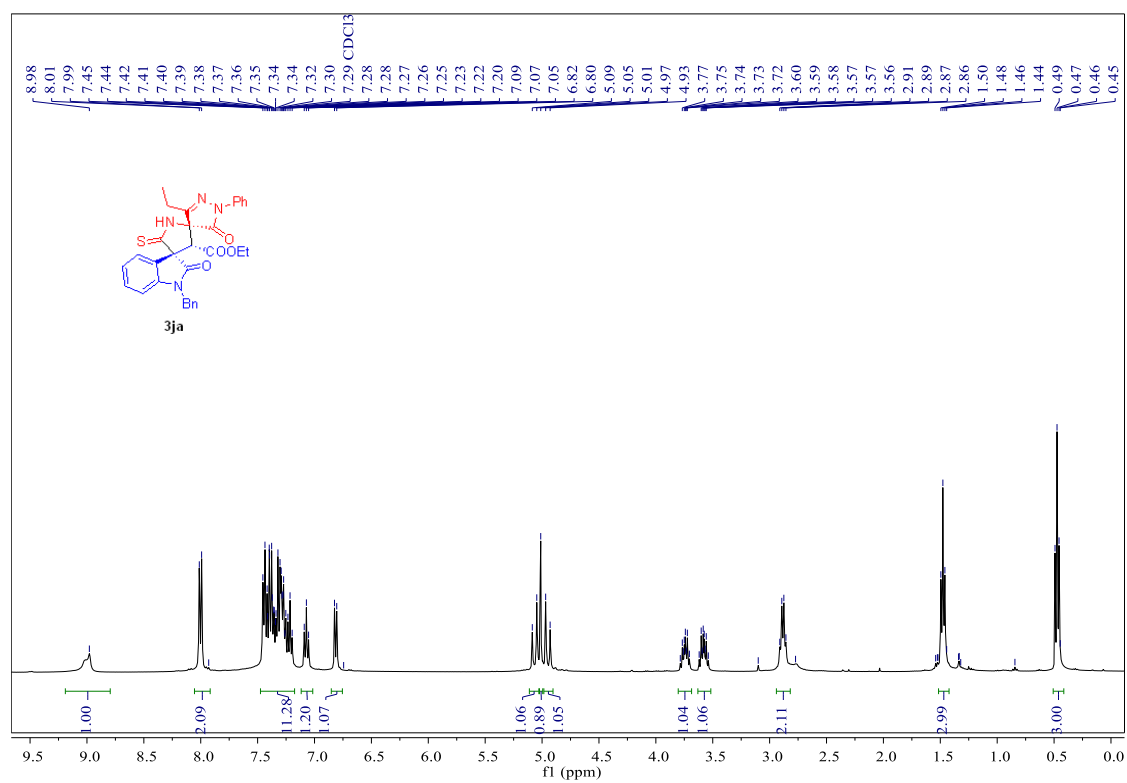

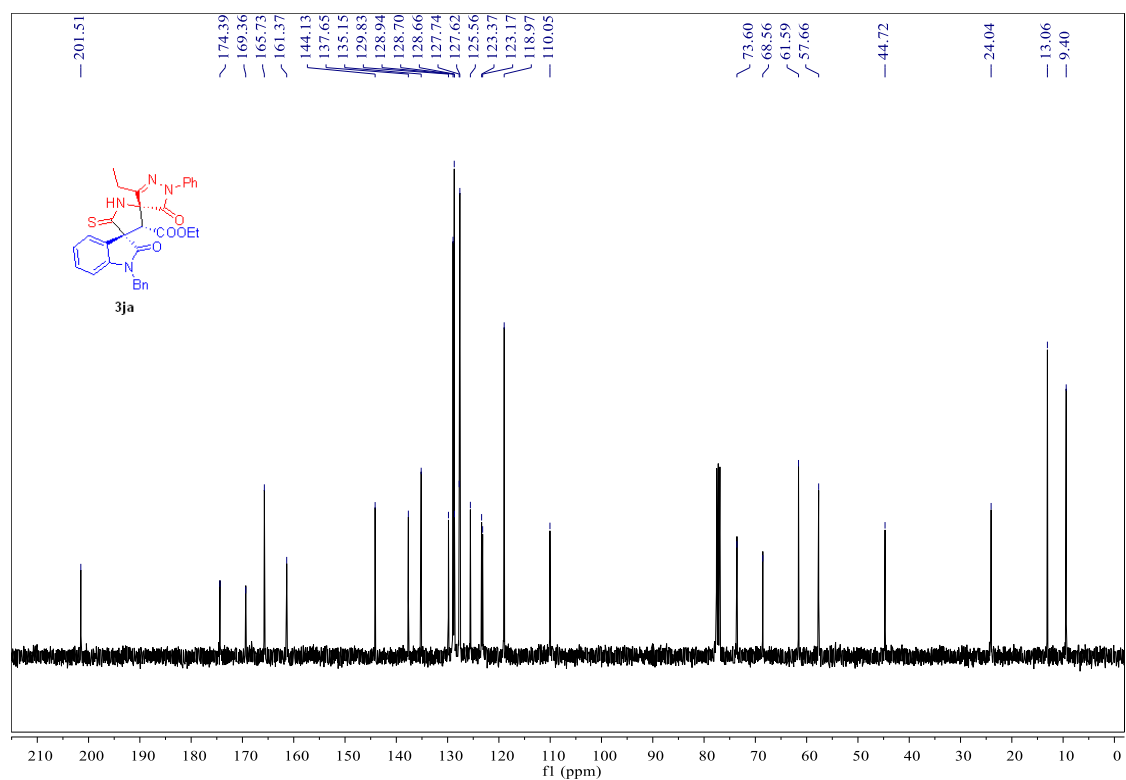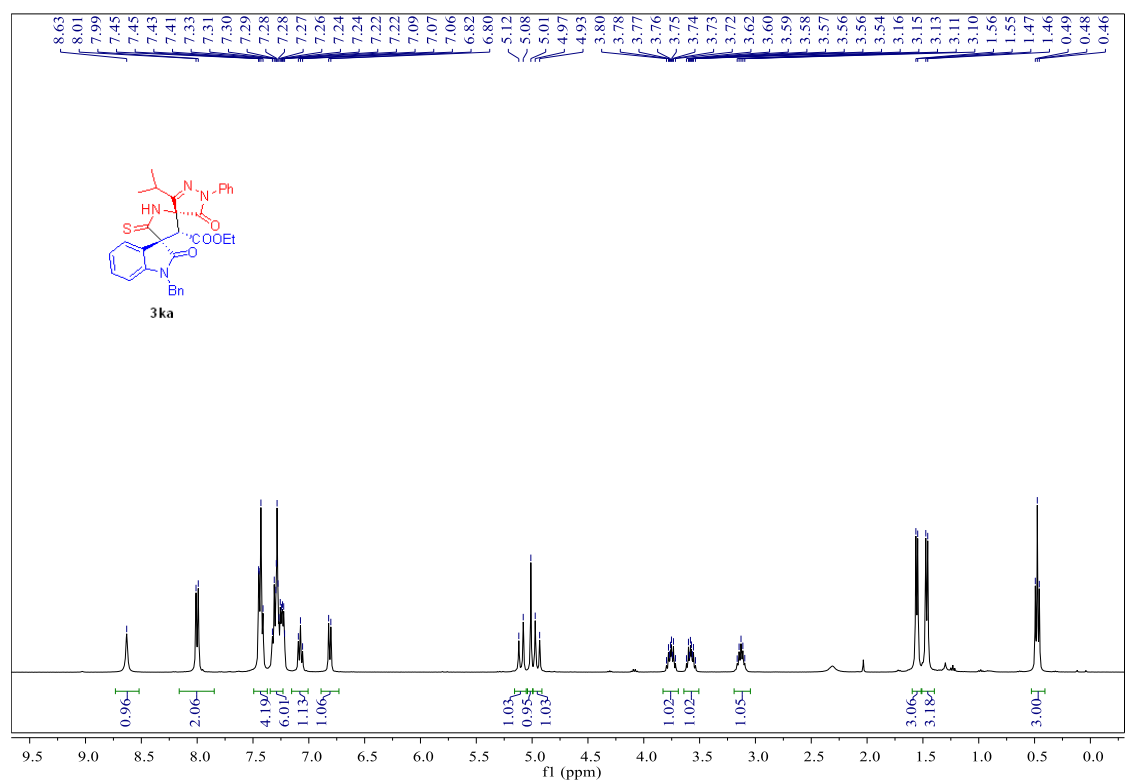

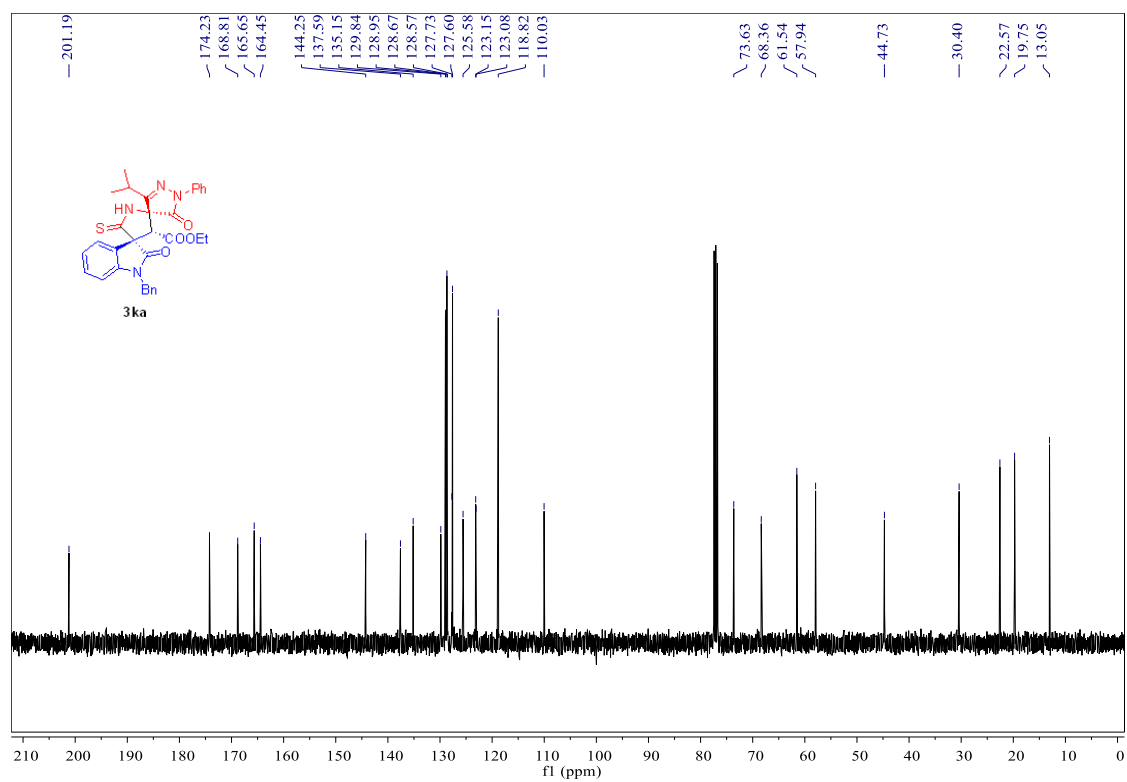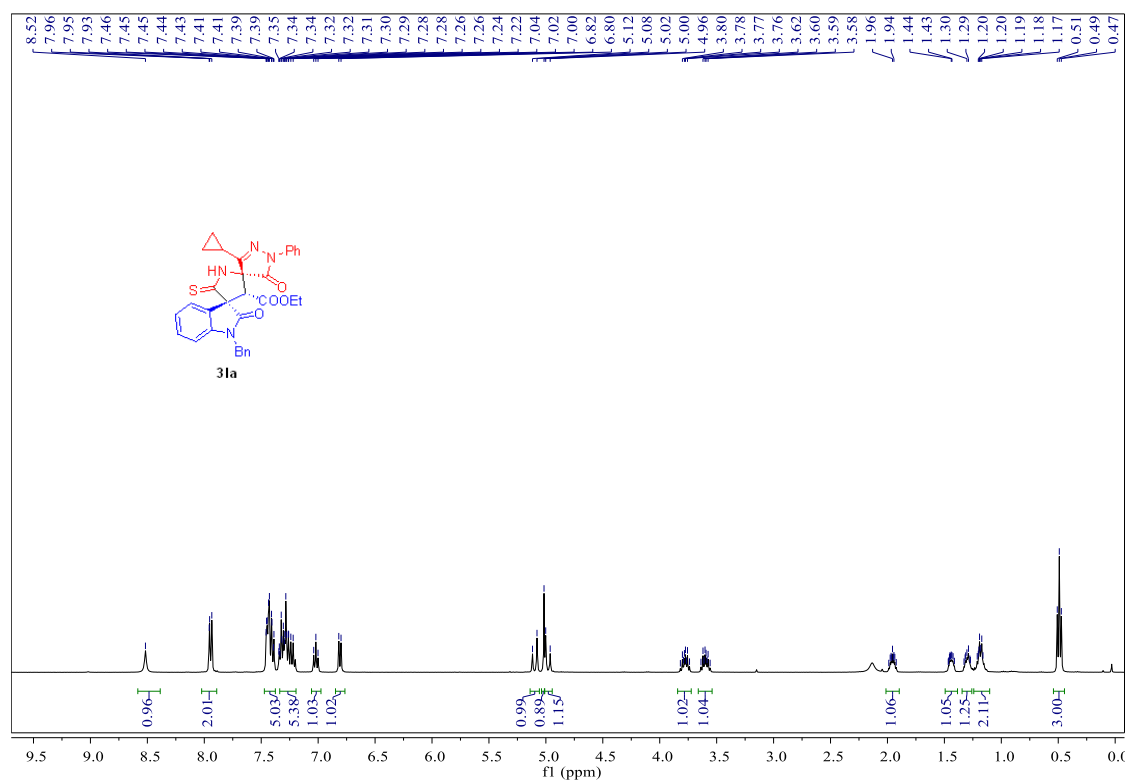

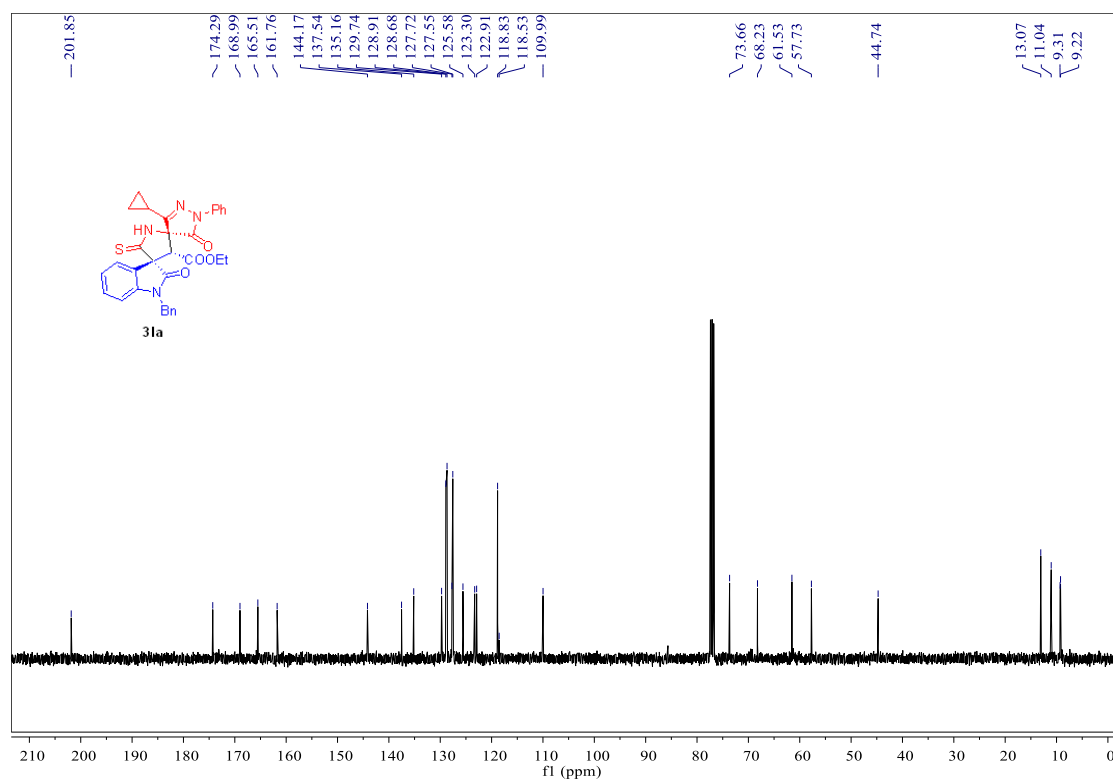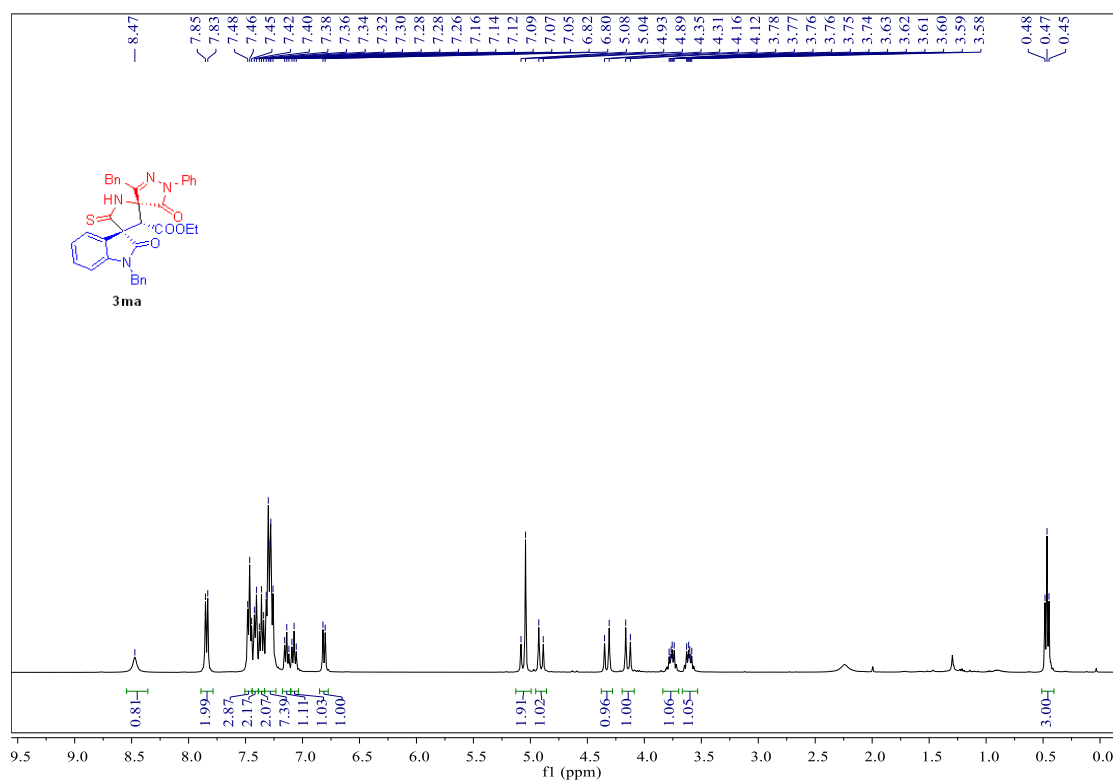

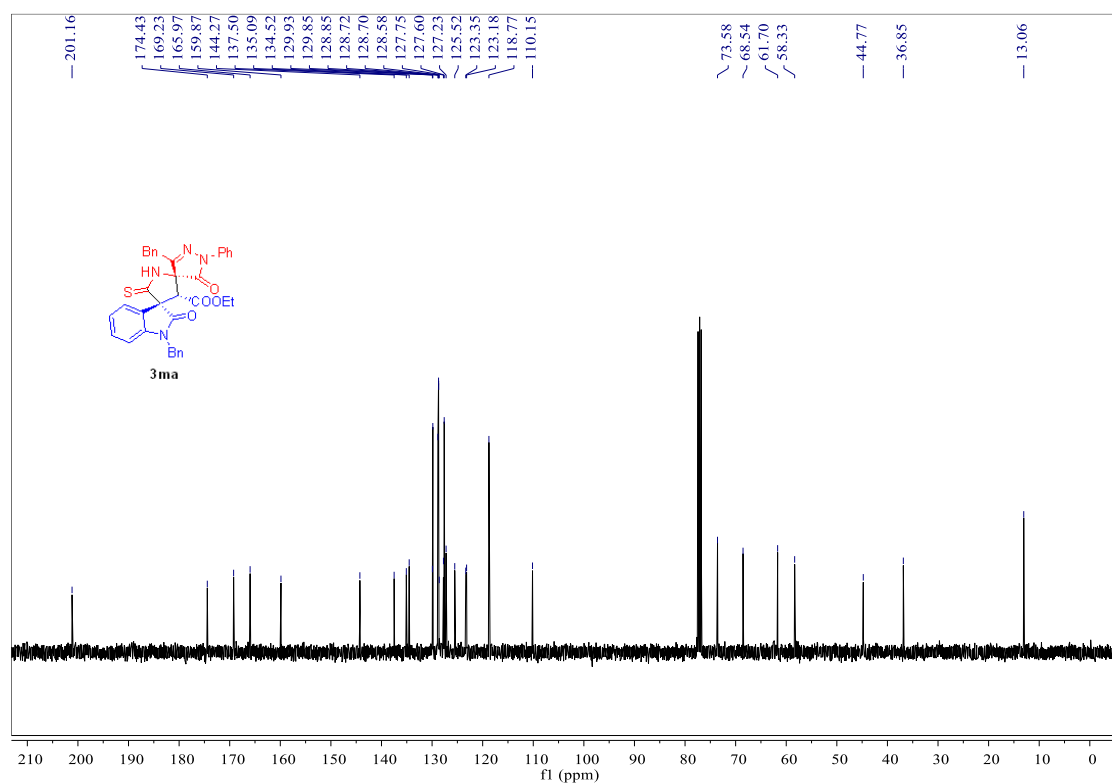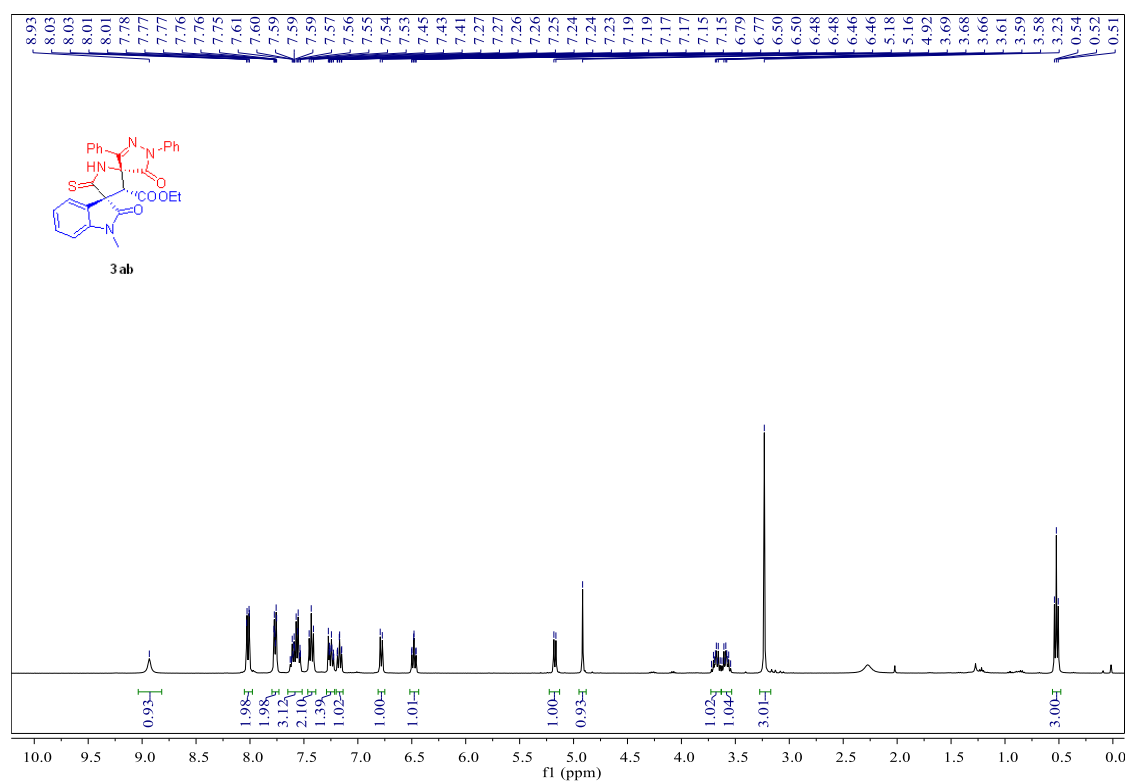

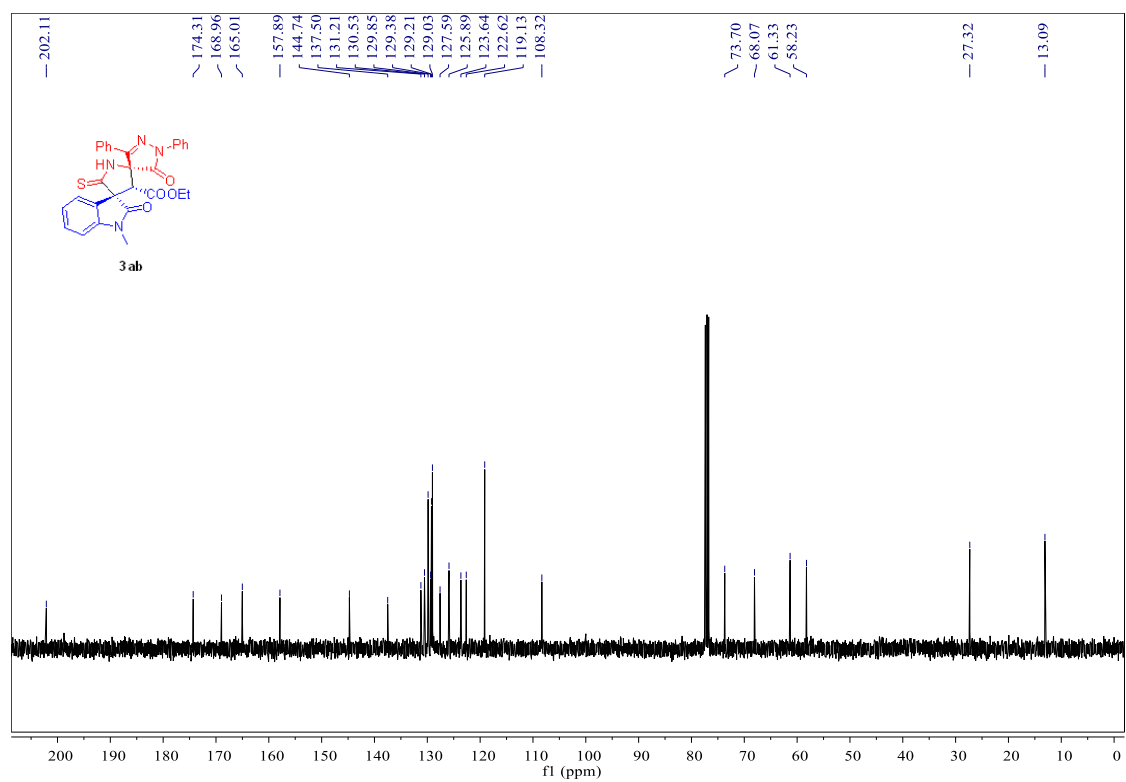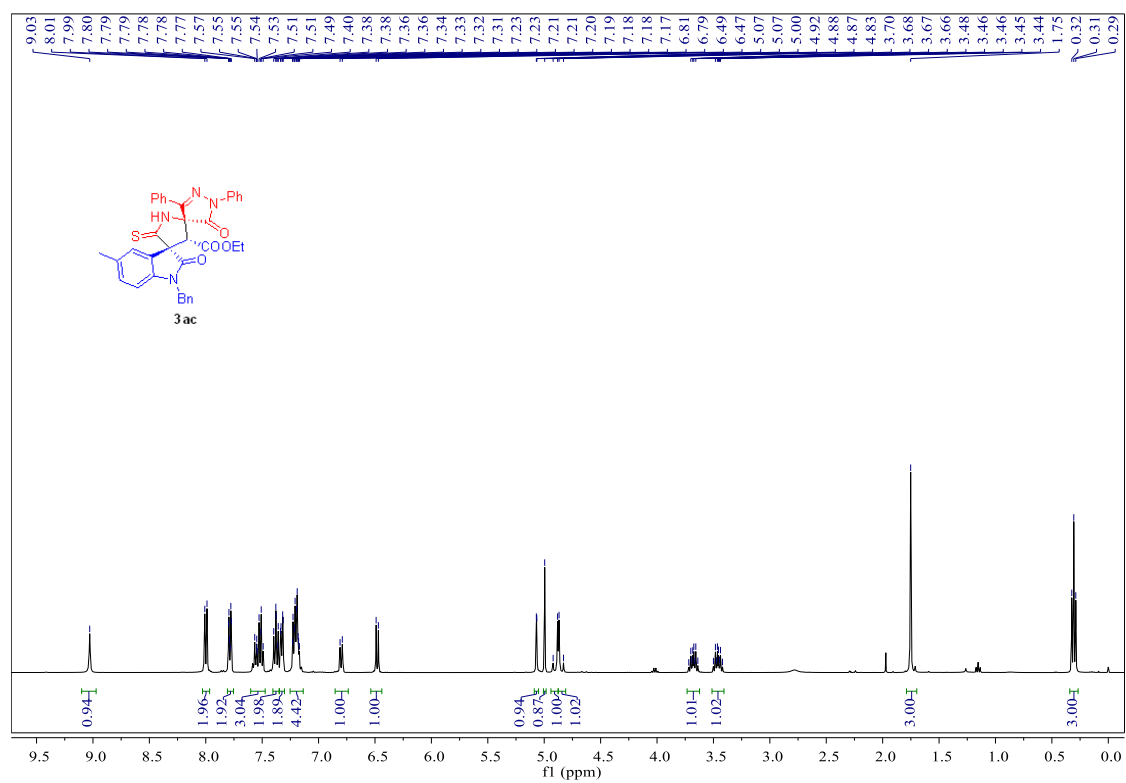

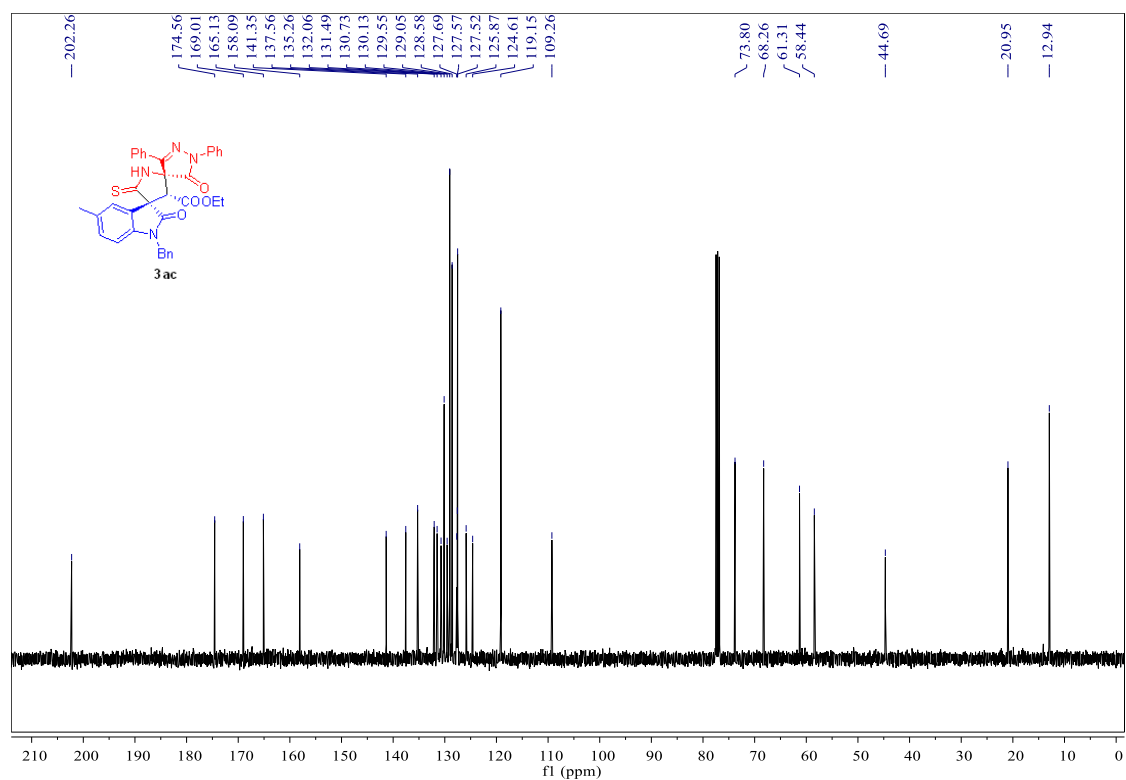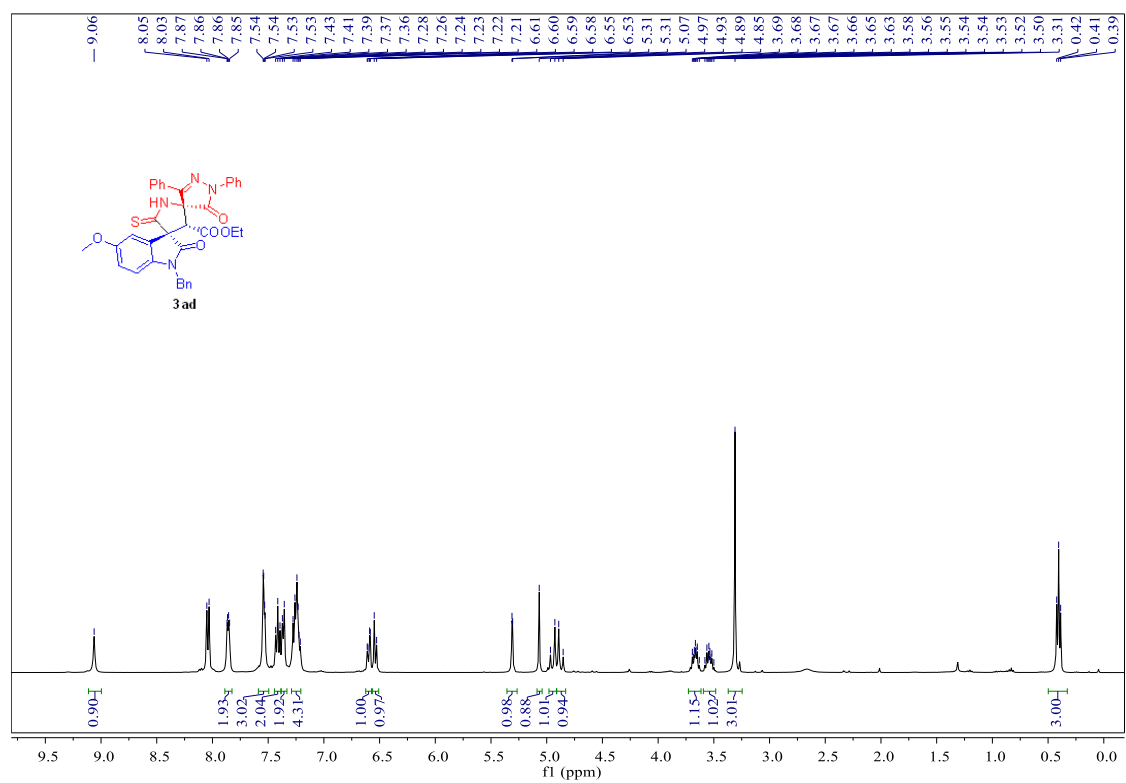

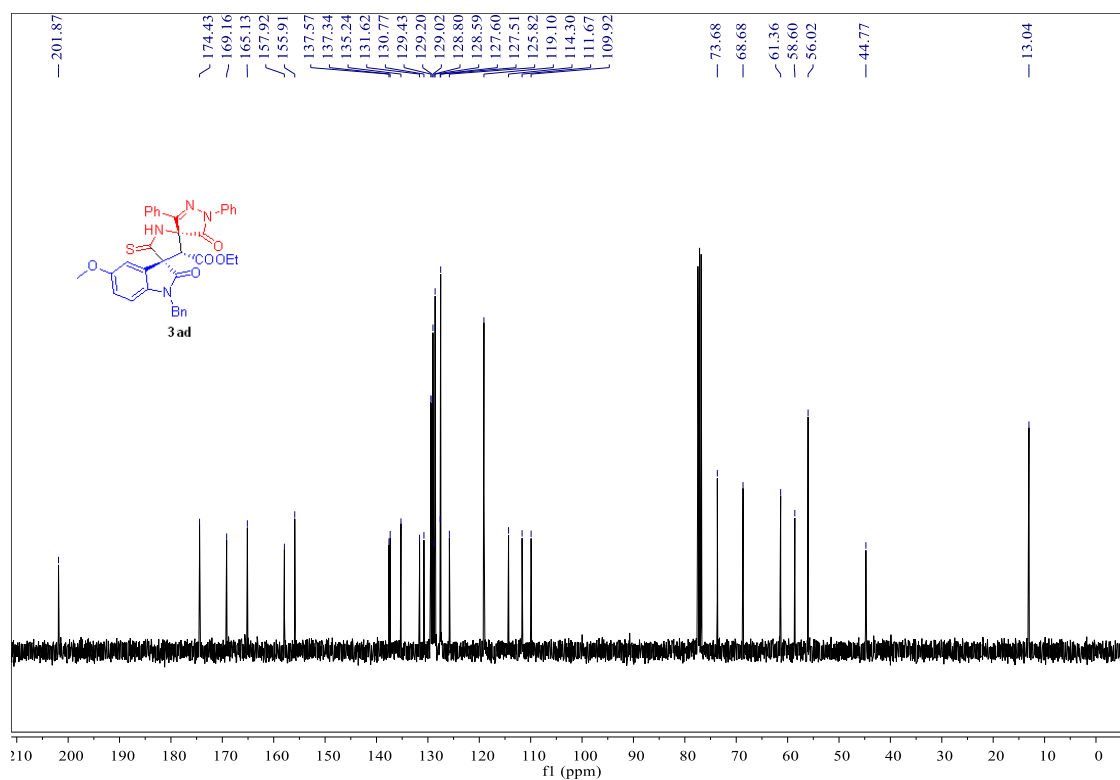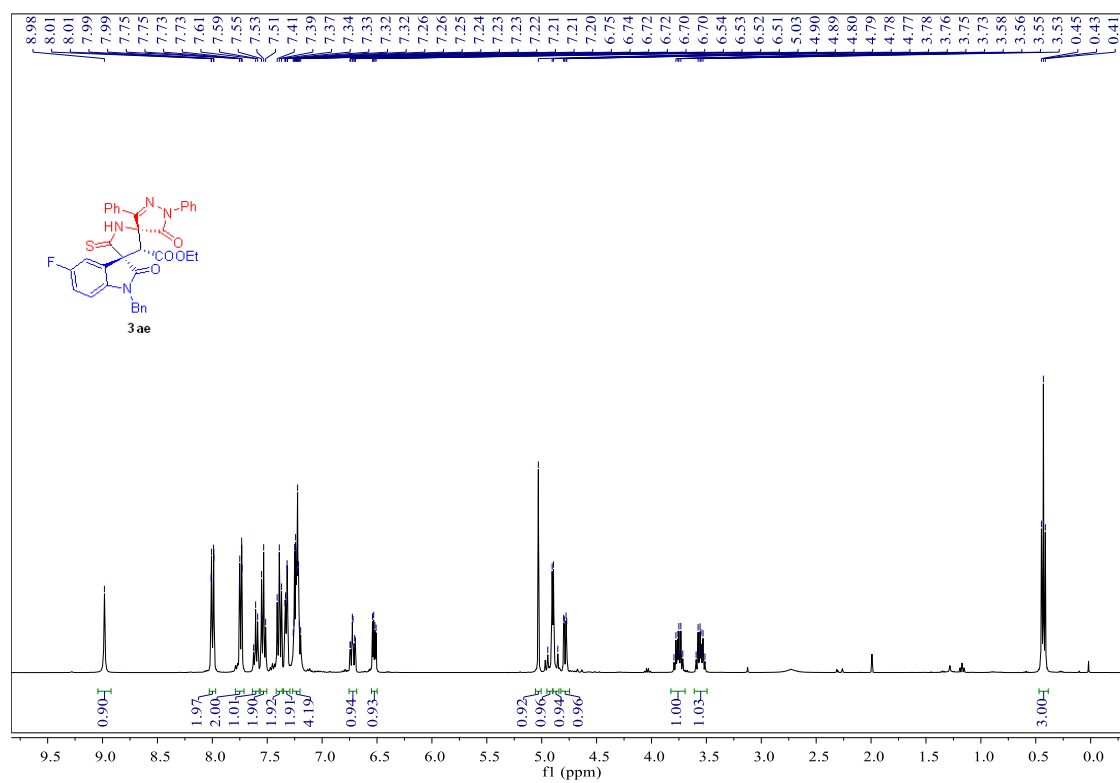

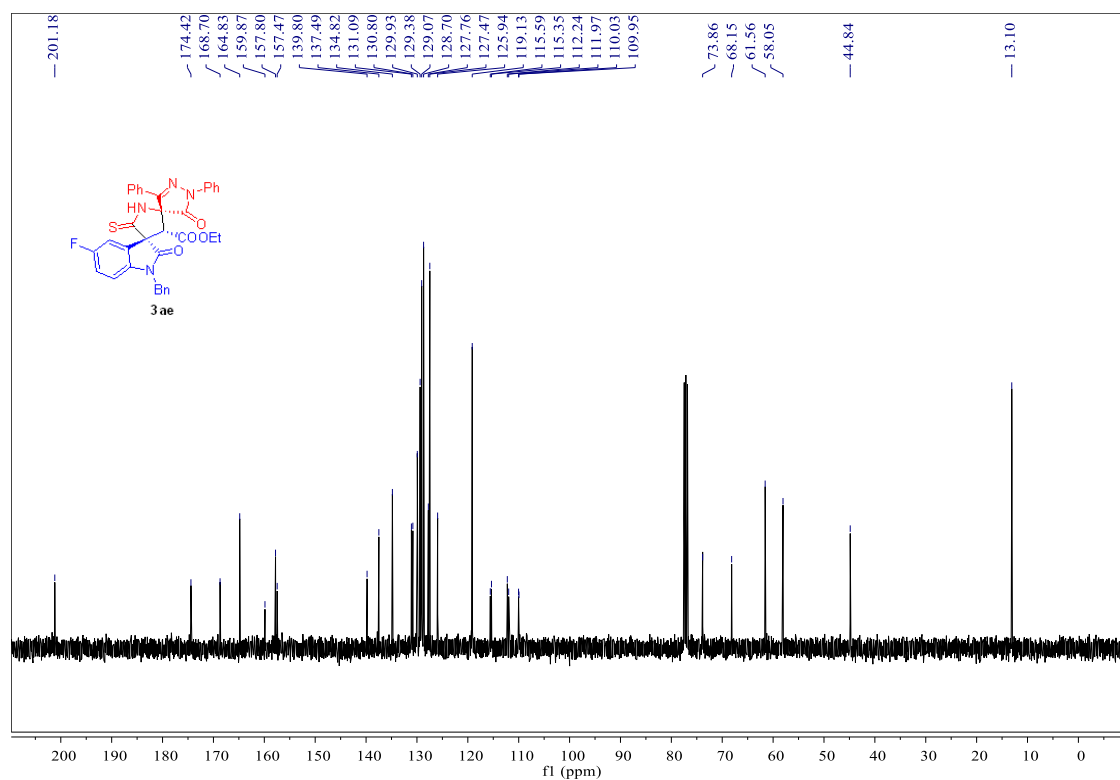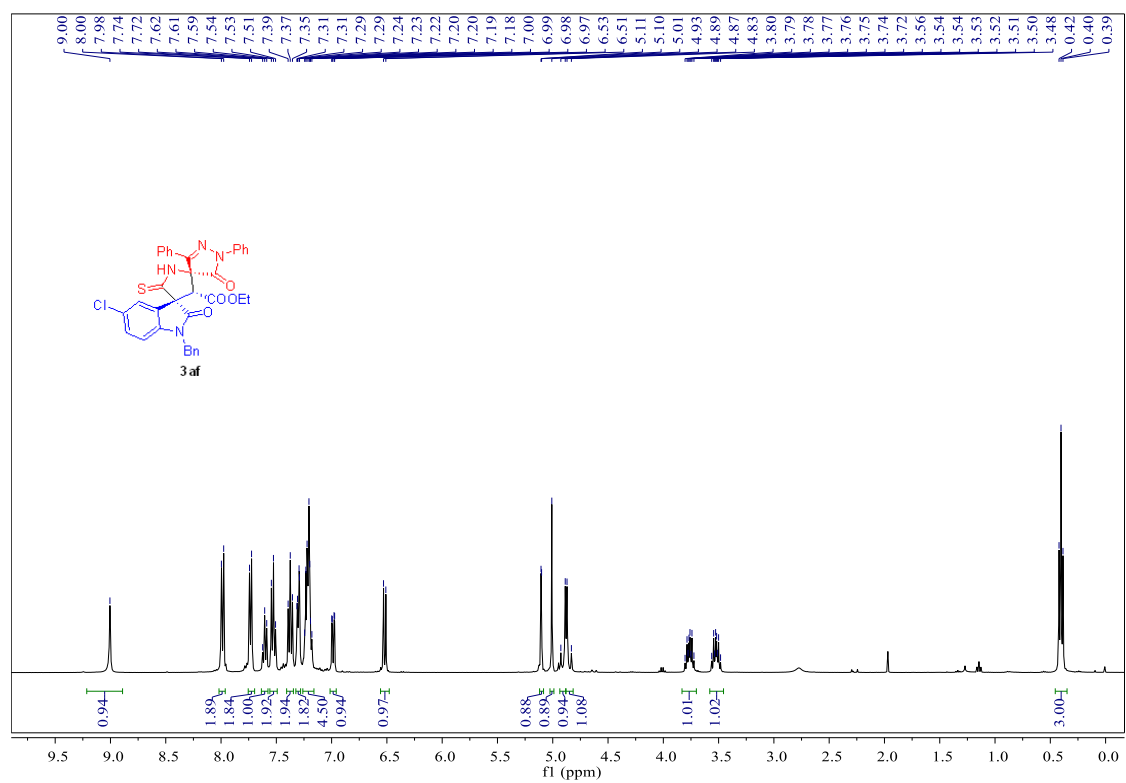

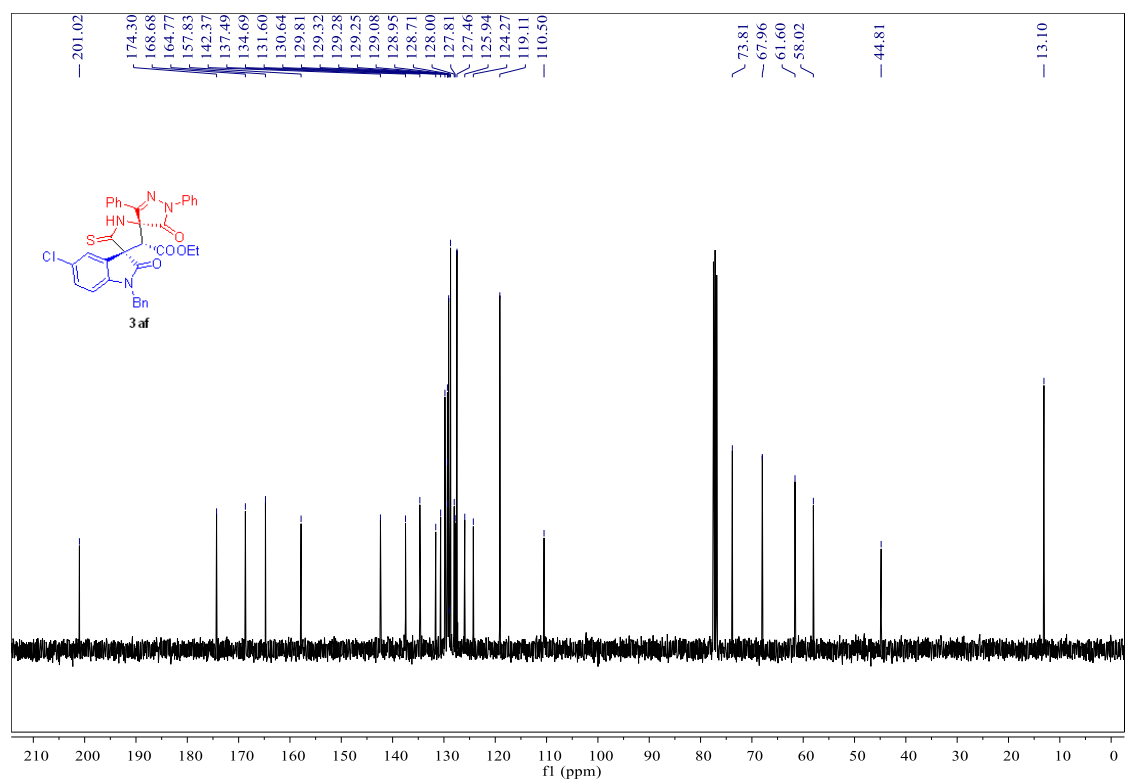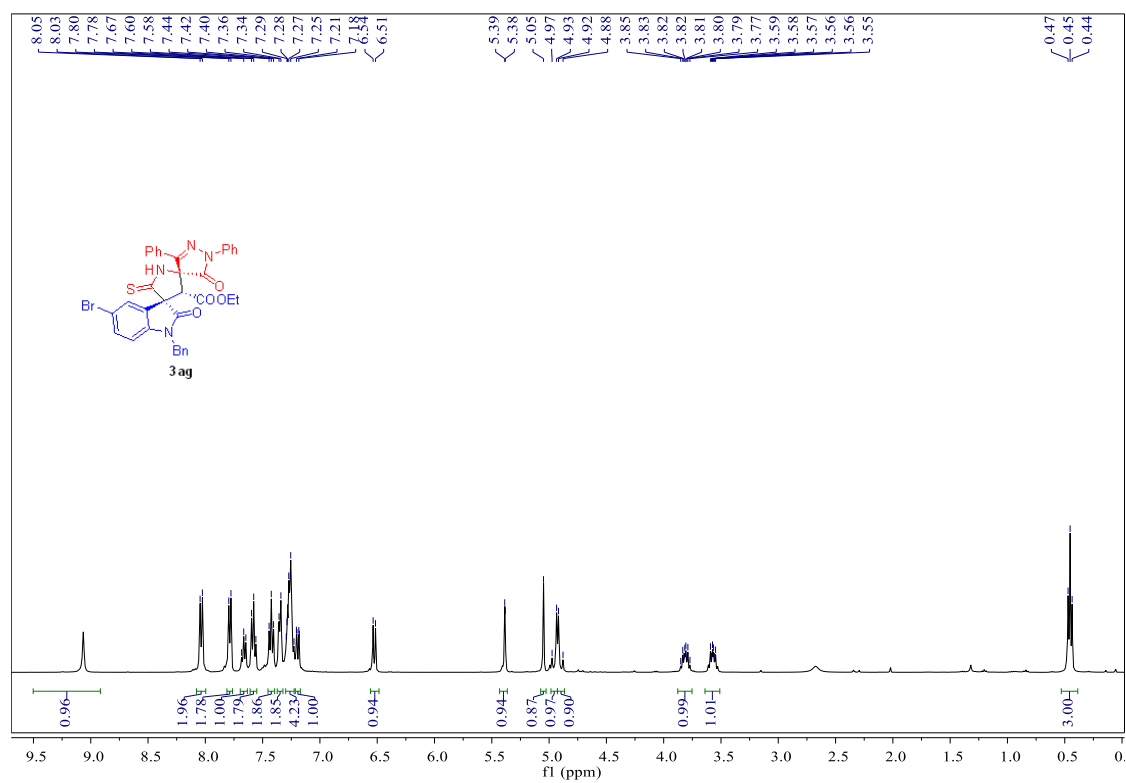

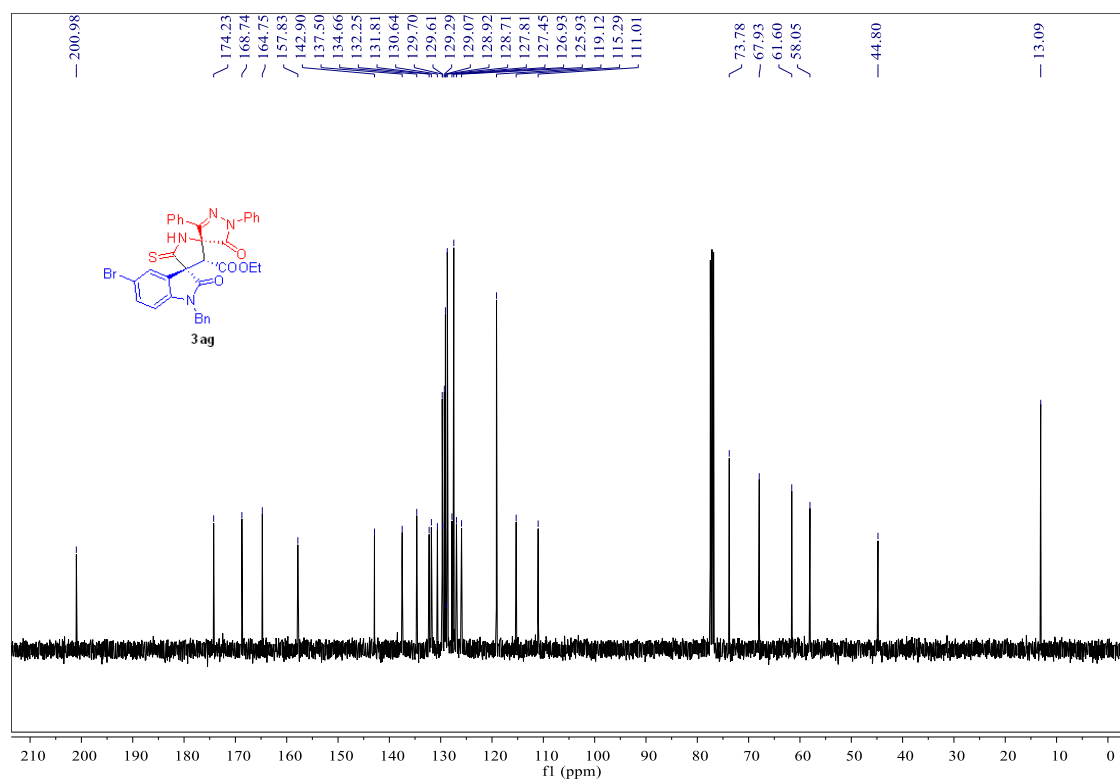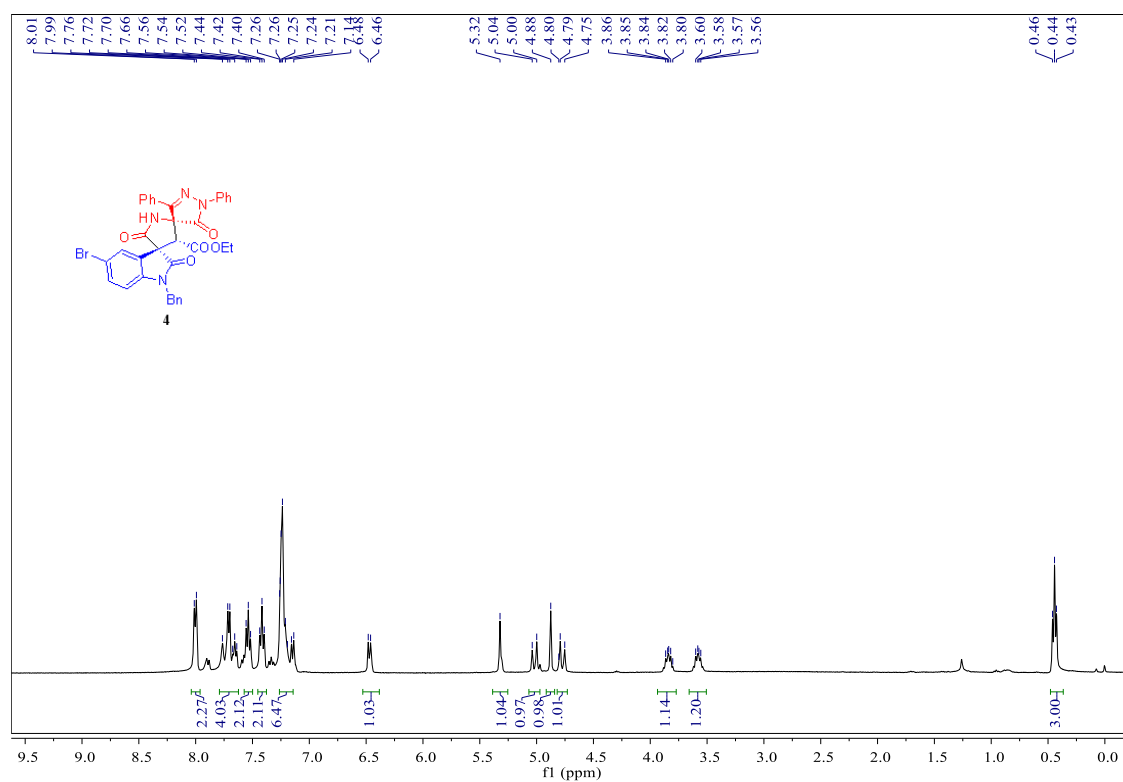

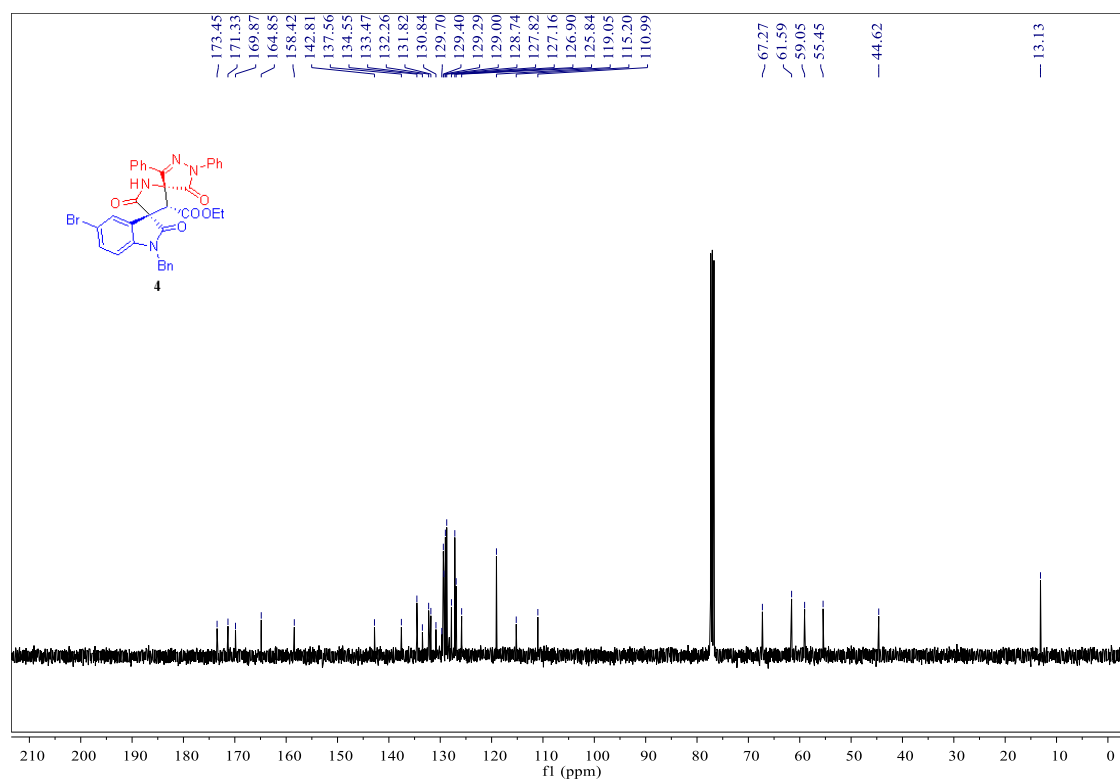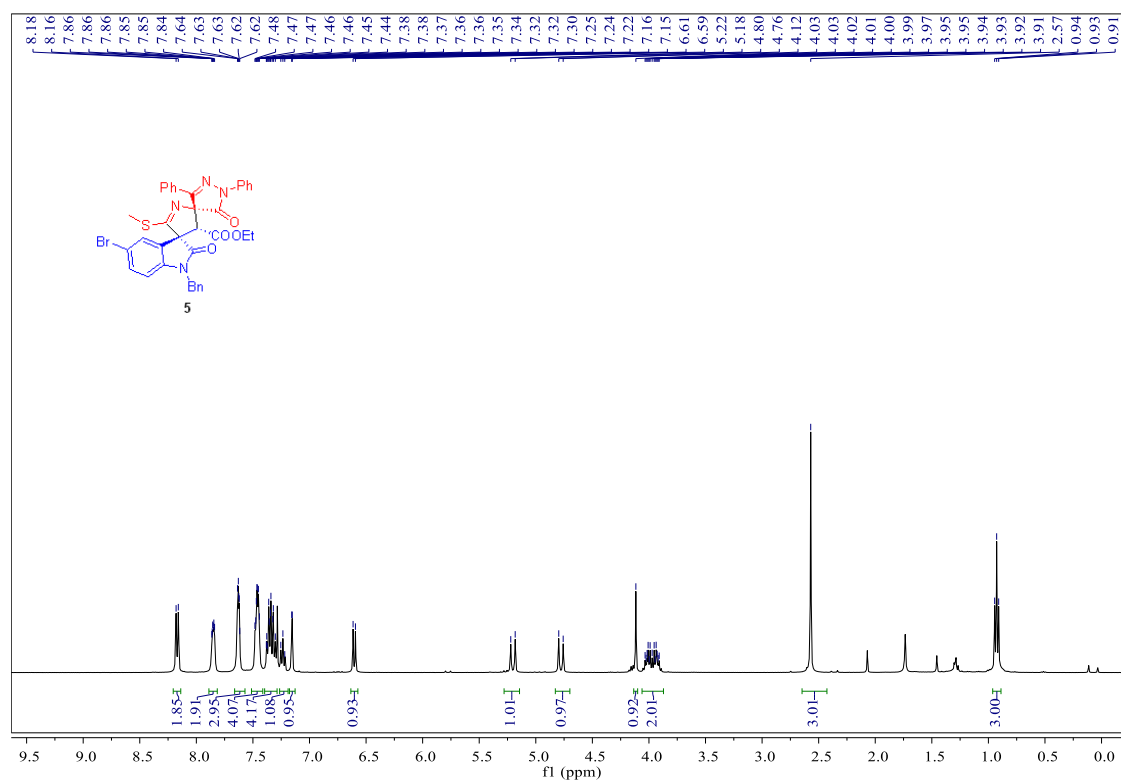

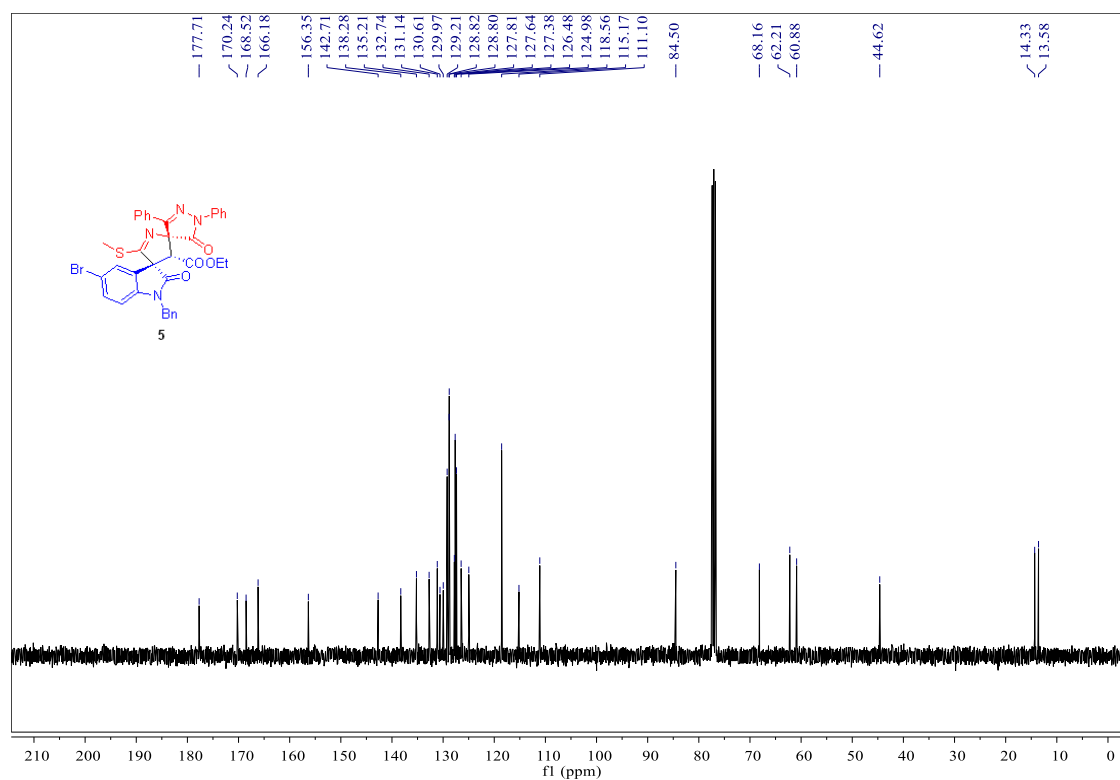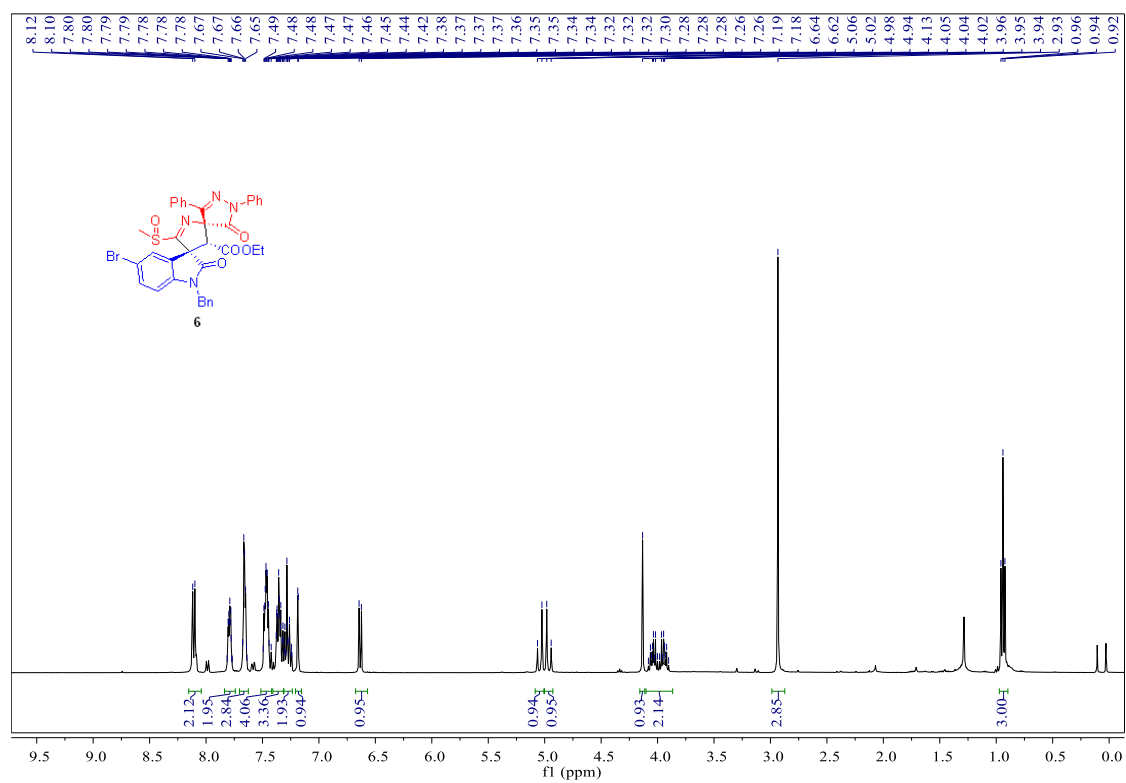

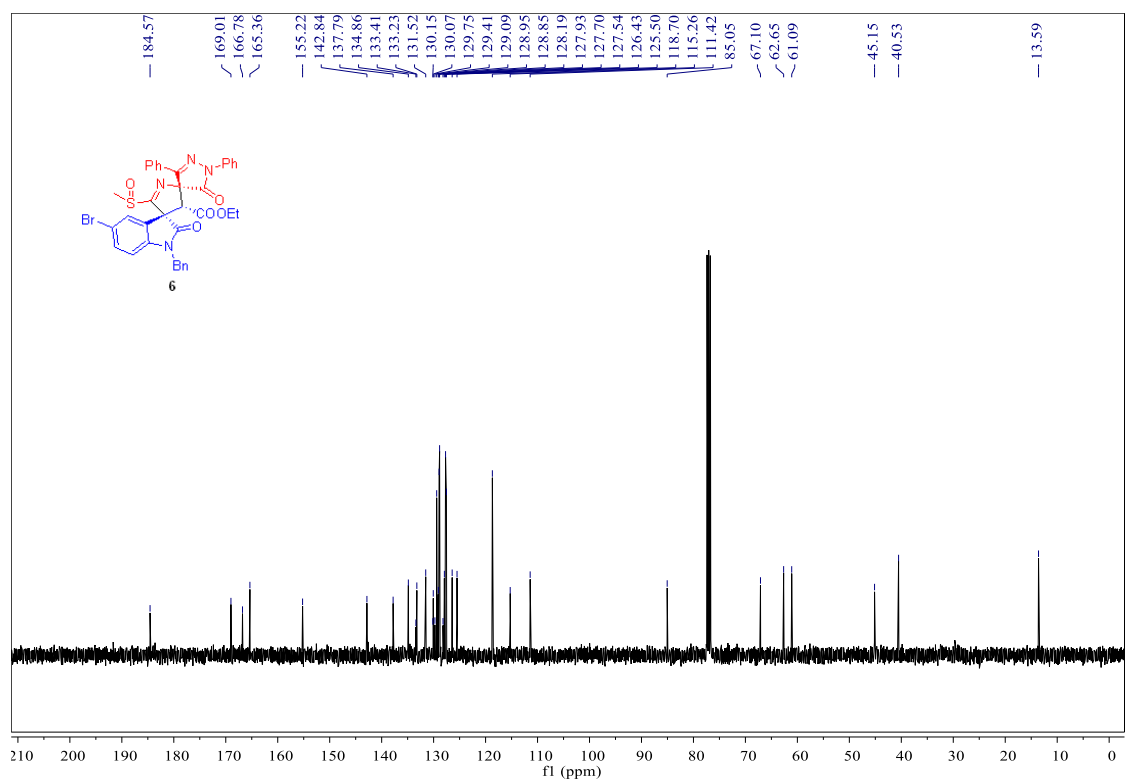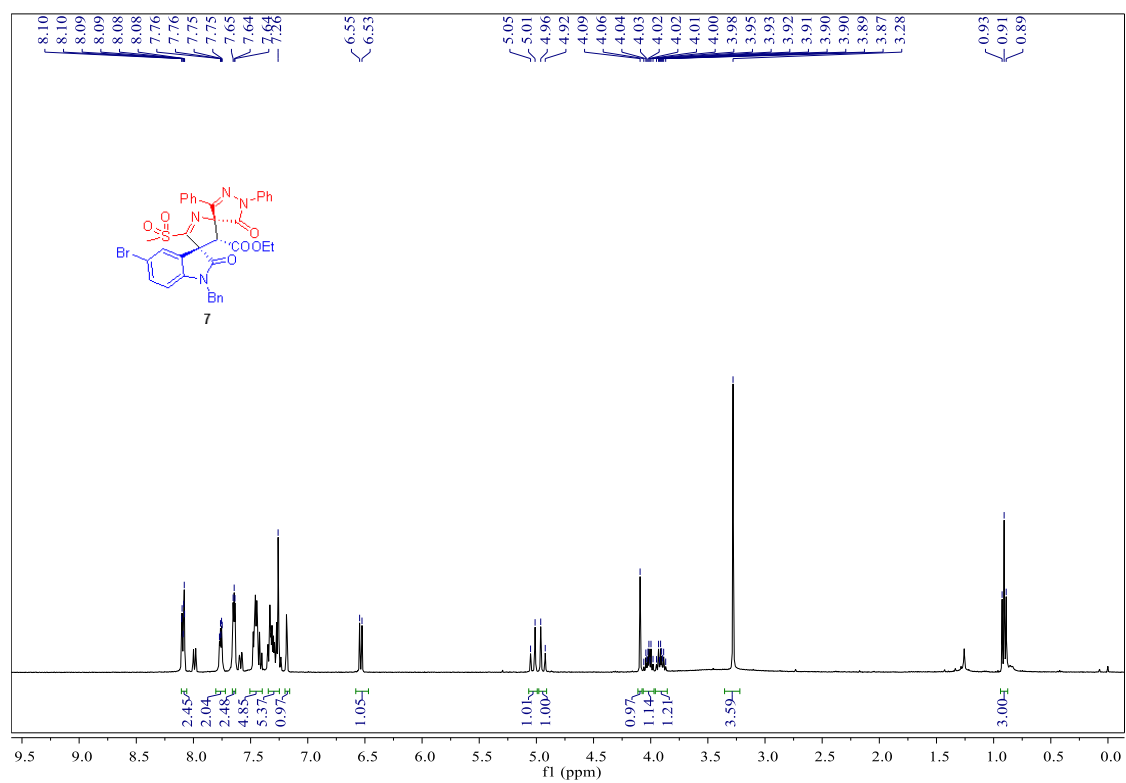

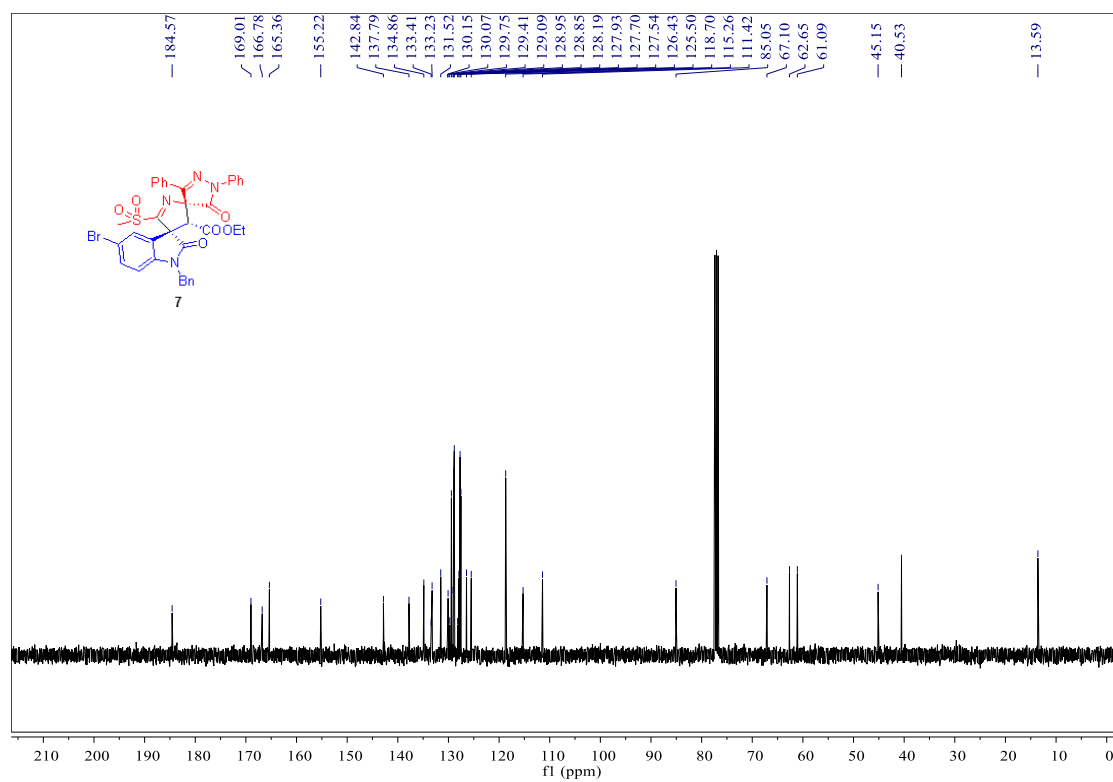

Supplement: d0cc04215c1.pdf [file d0cc04215c1.pdf]
